# Supplementary material
Source: MDPI journal article supplement (https://www.mdpi.com/2673-7051/3/2/22)
Supplement: s1 [file s1]

## Supplementary materials

|                                                                                                                                                                                                                                                            |     |
|------------------------------------------------------------------------------------------------------------------------------------------------------------------------------------------------------------------------------------------------------------|-----|
| SUPPLEMENTARY TABLE S1. PRISMA CHECKLIST .....                                                                                                                                                                                                             | 2   |
| SUPPLEMENTARY TABLE S2. SEARCH STRATEGIES FOR THE FIVE DATABASES .....                                                                                                                                                                                     | 7   |
| SUPPLEMENTARY TABLE S3. STUDIES INCLUDED IN THE SYSTEMATIC REVIEW.....                                                                                                                                                                                     | 11  |
| SUPPLEMENTARY TABLE S4. NUMBER OF STUDIES INCLUDED IN META-ANALYSES AFTER DATA EXTRACTION. ....                                                                                                                                                            | 69  |
| SUPPLEMENTARY TABLE S5. INSTRUMENTS REPORTED IN THE LITERATURE AND MEASURING PERFECTIONISM IN CHILDHOOD AND ADOLESCENCE. ....                                                                                                                              | 70  |
| SUPPLEMENTARY TABLE S6. SUMMARY OF META-ANALYSES USING RANDOM-EFFECTS MODELS ON THE RELATIONSHIP BETWEEN EATING RELATED SYMPTOMS TOTAL SCORES AND PERFECTIONISM TYPES.....                                                                                 | 72  |
| SUPPLEMENTARY FIGURE S1. FOREST PLOT OF THE MAGNITUDE OF THE ASSOCIATION BETWEEN UNIDIMENSIONAL PERFECTIONISM AND EATING RELATED SYMPTOMS. ....                                                                                                            | 79  |
| SUPPLEMENTARY FIGURE S2. FOREST PLOT OF THE MAGNITUDE OF THE ASSOCIATION BETWEEN PERFECTIONISTIC STRIVINGS AND EATING RELATED SYMPTOMS. ....                                                                                                               | 81  |
| SUPPLEMENTARY FIGURE S3. FOREST PLOT OF THE MAGNITUDE OF THE ASSOCIATION BETWEEN PERFECTIONISTIC CONCERNS AND EATING RELATED SYMPTOMS. ....                                                                                                                | 83  |
| SUPPLEMENTARY FIGURE S4. FUNNEL PLOTS FOR THE ASSOCIATION BETWEEN EATING RELATED SYMPTOMS, UNIDIMENSIONAL PERFECTIONISM, PERFECTIONISTIC STRIVINGS AND CONCERNS.....                                                                                       | 85  |
| SUPPLEMENTARY TABLE S7. SUMMARY OF META-ANALYSES USING RANDOM-EFFECTS MODELS ON THE RELATIONSHIP BETWEEN EATING RELATED SYMPTOMS TOTAL SCORES AND PERFECTIONISM (SUBDIVIDED BY THEIR CLINICAL STATUS AND THEIR MEAN AGE).....                              | 88  |
| SUPPLEMENTARY FIGURE S5. FOREST PLOT OF THE MAGNITUDE OF THE ASSOCIATION BETWEEN UNIDIMENSIONAL PERFECTIONISM, PERFECTIONISTIC STRIVINGS, PERFECTIONISTIC CONCERNS AND EATING GLOBAL SCORES (SUBDIVIDED BY THEIR CLINICAL STATUS AND THEIR MEAN AGE). .... | 105 |
| SUPPLEMENTARY FIGURE S6. FOREST PLOT OF THE MAGNITUDE OF THE ASSOCIATION BETWEEN UNIDIMENSIONAL PERFECTIONISM AND EATING RELATED SYMPTOMS (SUBDIVIDED BY THEIR CLINICAL STATUS AND THEIR MEAN AGE). ....                                                   | 108 |
| SUPPLEMENTARY FIGURE S7. FOREST PLOT OF THE MAGNITUDE OF THE ASSOCIATION BETWEEN PERFECTIONISTIC STRIVINGS AND EATING RELATED SYMPTOMS (SUBDIVIDED BY THEIR CLINICAL STATUS AND THEIR MEAN AGE). ....                                                      | 111 |
| SUPPLEMENTARY FIGURE S8. FOREST PLOT OF THE MAGNITUDE OF THE ASSOCIATION BETWEEN PERFECTIONISTIC CONCERNS, EATING RELATED SYMPTOMS (SUBDIVIDED BY THEIR CLINICAL STATUS AND THEIR MEAN AGE). ....                                                          | 114 |

**Supplementary Table S1. PRISMA Checklist**

| Section and topic    | Item | Checklist item                                                                                                                                                                                            | Location where item is reported |
|----------------------|------|-----------------------------------------------------------------------------------------------------------------------------------------------------------------------------------------------------------|---------------------------------|
| <b>Title</b>         |      | Perfectionism in children and adolescents with eating related symptoms: a systematic review and a meta-analysis of effect estimates.                                                                      | Page 1                          |
| Title                | 1    | Identify the report as a systematic review.                                                                                                                                                               | Page 1                          |
| <b>Abstract</b>      |      |                                                                                                                                                                                                           |                                 |
| Abstract             | 2    | See the PRISMA 2020 for Abstracts checklist (Table 2).                                                                                                                                                    | Page 3                          |
| <b>Introduction</b>  |      |                                                                                                                                                                                                           |                                 |
| Rationale            | 3    | Describe the rationale for the review in the context of existing knowledge.                                                                                                                               | Page 1 to 3                     |
| Objectives           | 4    | Provide an explicit statement of the objective(s) or question(s) the review addresses.                                                                                                                    | Page 3                          |
| <b>Methods</b>       |      |                                                                                                                                                                                                           |                                 |
| Eligibility criteria | 5    | Specify the inclusion and exclusion criteria for the review and how studies were grouped for the syntheses.                                                                                               | Page 3 to 4                     |
| Information sources  | 6    | Specify all databases, registers, websites, organizations, reference lists and other sources searched or consulted to identify studies. Specify the date when each source was last searched or consulted. | Page 3 to 4                     |
| Search strategy      | 7    | Present the full search strategies for all databases, registers and websites, including any filters and limits used.                                                                                      | Page 3 to 4                     |

|                               |      |                                                                                                                                                                                                                                                                                                      |             |
|-------------------------------|------|------------------------------------------------------------------------------------------------------------------------------------------------------------------------------------------------------------------------------------------------------------------------------------------------------|-------------|
| Selection process             | 8    | Specify the methods used to decide whether a study met the inclusion criteria of the review, including how many reviewers screened each record and each report retrieved, whether they worked independently, and if applicable, details of automation tools used in the process.                     | Page 3 to 4 |
| Data collection process       | 9    | Specify the methods used to collect data from reports, including how many reviewers collected data from each report, whether they worked independently, any processes for obtaining or confirming data from study investigators, and if applicable, details of automation tools used in the process. | Page 3 to 4 |
| Data items                    | 10 a | List and define all outcomes for which data were sought. Specify whether all results that were compatible with each outcome domain in each study were sought (e.g. for all measures, time points, analyses), and if not, the methods used to decide which results to collect.                        | Page 4      |
|                               | 10 b | List and define all other variables for which data were sought (e.g. participant and intervention characteristics, funding sources). Describe any assumptions made about any missing or unclear information.                                                                                         | Page 4      |
| Study risk of bias assessment | 11   | Specify the methods used to assess risk of bias in the included studies, including details of the tool(s) used, how many reviewers assessed each study and whether they worked independently, and if applicable, details of automation tools used in the process.                                    | Page 4      |
| Effect measures               | 12   | Specify for each outcome the effect measure(s) (e.g., risk ratio, mean difference) used in the synthesis or presentation of results.                                                                                                                                                                 | Page 4      |
| Synthesis methods             | 13 a | Describe the processes used to decide which studies were eligible for each synthesis (e.g., tabulating the study intervention characteristics and comparing against the planned groups for each synthesis (item #5)).                                                                                | Page 4      |

|                           |      |                                                                                                                                                                                                                                                             |               |
|---------------------------|------|-------------------------------------------------------------------------------------------------------------------------------------------------------------------------------------------------------------------------------------------------------------|---------------|
|                           | 13 b | Describe any methods required to prepare the data for presentation or synthesis, such as handling of missing summary statistics, or data conversions.                                                                                                       | Page 5 to 6   |
|                           | 13 c | Describe any methods used to tabulate or visually display results of individual studies and syntheses.                                                                                                                                                      | Page 6        |
|                           | 13 d | Describe any methods used to synthesize results and provide a rationale for the choice(s). If meta-analysis was performed, describe the model(s), method(s) to identify the presence and extent of statistical heterogeneity, and software package(s) used. | Page 6        |
|                           | 13 e | Describe any methods used to explore possible causes of heterogeneity among study results (e.g., subgroup analysis, metaregression).                                                                                                                        | Page 6        |
|                           | 13 f | Describe any sensitivity analyses conducted to assess robustness of the synthesized results.                                                                                                                                                                | Page 6        |
| Reporting bias assessment | 14   | Describe any methods used to assess risk of bias due to missing results in a synthesis (arising from reporting biases).                                                                                                                                     | Page 6        |
| Certainty assessment      | 15   | Describe any methods used to assess certainty (or confidence) in the body of evidence for an outcome.                                                                                                                                                       | Page 6        |
| <b>Results</b>            |      |                                                                                                                                                                                                                                                             |               |
| Study selection           | 16 a | Describe the results of the search and selection process, from the number of records identified in the search to the number of studies included in the review, ideally using a flow diagram (see Fig. 1).                                                   | Page 4 to 6   |
|                           | 16 b | Cite studies that might appear to meet the inclusion criteria, but which were excluded, and explain why they were excluded.                                                                                                                                 | Page 4        |
| Study characteristics     | 17   | Cite each included study and present its characteristics.                                                                                                                                                                                                   | Page 6 and in |

|                               |      |                                                                                                                                                                                                                                                                                       |                                   |
|-------------------------------|------|---------------------------------------------------------------------------------------------------------------------------------------------------------------------------------------------------------------------------------------------------------------------------------------|-----------------------------------|
|                               |      |                                                                                                                                                                                                                                                                                       | supplementary materials           |
| Risk of bias in studies       | 18   | Present assessments of risk of bias for each included study.                                                                                                                                                                                                                          | Page 6                            |
| Results of individual studies | 19   | For all outcomes, present, for each study: (a) summary statistics for each group (where appropriate) and (b) an effect estimates and its precision (e.g., confidence/credible interval), ideally using structured tables or plots.                                                    | Page 6 and Table 3 in supplements |
| Results of syntheses          | 20 a | For each synthesis, briefly summarize the characteristics and risk of bias among contributing studies.                                                                                                                                                                                | Page 6 to 12                      |
|                               | 20 b | Present results of all statistical syntheses conducted. If meta-analysis was done, present for each the summary estimate and its precision (e.g., confidence/credible interval) and measures of statistical heterogeneity. If comparing groups, describe the direction of the effect. | Page 6 to 12                      |
|                               | 20 c | Present results of all investigations of possible causes of heterogeneity among study results.                                                                                                                                                                                        | Page 6 to 12                      |
|                               | 20 d | Present results of all sensitivity analyses conducted to assess the robustness of the synthesized results.                                                                                                                                                                            | Page 6 to 12                      |
| Reporting biases              | 21   | Present assessments of risk of bias due to missing results (arising from reporting biases) for each synthesis assessed.                                                                                                                                                               | Page 12                           |
| Certainty of evidence         | 22   | Present assessments of certainty (or confidence) in the body of evidence for each outcome assessed.                                                                                                                                                                                   | Page 6 to 12                      |
| <b>Discussion</b>             |      |                                                                                                                                                                                                                                                                                       |                                   |
| Discussion                    | 23 a | Provide a general interpretation of the results in the context of other evidence.                                                                                                                                                                                                     | Page 12 to 16                     |

|                                                 |      |                                                                                                                                                                                                                                            |               |
|-------------------------------------------------|------|--------------------------------------------------------------------------------------------------------------------------------------------------------------------------------------------------------------------------------------------|---------------|
|                                                 | 23 b | Discuss any limitations of the evidence included in the review.                                                                                                                                                                            | Page 15 to 16 |
|                                                 | 23 c | Discuss any limitations of the review processes used.                                                                                                                                                                                      | Page 15 to 16 |
|                                                 | 23 d | Discuss implications of the results for practice, policy, and future research.                                                                                                                                                             | Page 15 to 16 |
| <b>Other information</b>                        |      |                                                                                                                                                                                                                                            |               |
| Registration and protocol                       | 24 a | Provide registration information for the review, including register name and registration number, or state that the review was not registered.                                                                                             | Page 3        |
|                                                 | 24 b | Indicate where the review protocol can be accessed, or state that a protocol was not prepared.                                                                                                                                             | NA            |
|                                                 | 24 c | Describe and explain any amendments to information provided at registration or in the protocol.                                                                                                                                            | NA            |
| Support                                         | 25   | Describe sources of financial or nonfinancial support for the review, and the role of the funders or sponsors in the review.                                                                                                               | Yes           |
| Competing interests                             | 26   | Declare any competing interests of review authors.                                                                                                                                                                                         | Yes           |
| Availability of data, code, and other materials | 27   | Report which of the following are publicly available and where they can be found: template data collection forms; data extracted from included studies; data used for all analyses; analytic code; any other materials used in the review. | Yes           |

## **Supplementary Table S2. Search strategies for the five databases**

### **MEDLINE (Ovid)**

| #  | Searches                                                                                                                                                                                                                                                                                                                                                                                                                                                                                                                                                                                                                                                      | Results |
|----|---------------------------------------------------------------------------------------------------------------------------------------------------------------------------------------------------------------------------------------------------------------------------------------------------------------------------------------------------------------------------------------------------------------------------------------------------------------------------------------------------------------------------------------------------------------------------------------------------------------------------------------------------------------|---------|
| 1  | exp "Feeding and Eating Disorders"/                                                                                                                                                                                                                                                                                                                                                                                                                                                                                                                                                                                                                           | 35290   |
| 2  | exp Hyperphagia/                                                                                                                                                                                                                                                                                                                                                                                                                                                                                                                                                                                                                                              | 9098    |
| 3  | ((eat* or feed* or appetite or food*) adj3 (disorder* or syndrome* or addict* or patholog*)),ti,ab,kf,kw,jw.                                                                                                                                                                                                                                                                                                                                                                                                                                                                                                                                                  | 35686   |
| 4  | (anorexi* or bulimi* or (binge eat* adj3 (disorder* or syndrome*)) or (compuls* adj3 eat*) or pica or allotriophag* or geophag* or (ruminat* adj3 (disorder* or syndrome*)) or ((eat* or feed* or appetite or food) adj3 neophob*) or diabulimi* or orthorexi* or (obsess* adj3 health* adj3 (eat* or feed* or appetite or food*)) or (purging adj3 (disorder* or syndrome*)) or (night eat* adj3 (disorder* or syndrome*)) or (((avoid* or restrict* or aversion) adj3 (eat* or feed* or food*)) or ARFID) or merycis* or hyperphag* or overeat* or overfeed* or overindulg* or polyphag* or (emotion* adj2 (eat* or feed*)) or EDNOS or OFSED).ti,ab,kf,kw. | 77330   |
| 5  | Perfectionism/                                                                                                                                                                                                                                                                                                                                                                                                                                                                                                                                                                                                                                                | 501     |
| 6  | (perfectionis* or flawlessness or high performan* or (over* adj2 critic*)),ti,ab,kf,kw.                                                                                                                                                                                                                                                                                                                                                                                                                                                                                                                                                                       | 172372  |
| 7  | Adolescent/                                                                                                                                                                                                                                                                                                                                                                                                                                                                                                                                                                                                                                                   | 2195574 |
| 8  | Young adult/                                                                                                                                                                                                                                                                                                                                                                                                                                                                                                                                                                                                                                                  | 1000961 |
| 9  | (adolescen* or teen* or youth or juvenile*).ti,ab,kf.                                                                                                                                                                                                                                                                                                                                                                                                                                                                                                                                                                                                         | 510962  |
| 10 | (young adj3 (adult* or person* or individual* or people* or population or man or men or wom#n)).ti,ab,kf,kw.                                                                                                                                                                                                                                                                                                                                                                                                                                                                                                                                                  | 237057  |
| 11 | (youngster* or first grader* or second grader* or third grader* or fourth grader* or fifth-grader* or sixth grader* or seventh grader* or highschool* or high school* or college*).ti,ab,kf.                                                                                                                                                                                                                                                                                                                                                                                                                                                                  | 182343  |
| 12 | ((("13" or "14" or "15" or "16" or "17" or "18") adj1 (year* or yr)).ti,ab,kf,kw.                                                                                                                                                                                                                                                                                                                                                                                                                                                                                                                                                                             | 457387  |
| 13 | or/1-4                                                                                                                                                                                                                                                                                                                                                                                                                                                                                                                                                                                                                                                        | 104028  |
| 14 | or/5-6                                                                                                                                                                                                                                                                                                                                                                                                                                                                                                                                                                                                                                                        | 172390  |
| 15 | or/7-12                                                                                                                                                                                                                                                                                                                                                                                                                                                                                                                                                                                                                                                       | 3249760 |
| 16 | 13 and 14 and 15                                                                                                                                                                                                                                                                                                                                                                                                                                                                                                                                                                                                                                              | 487     |

## Embase (Ovid)

| #  | Searches                                                                                                                                                                                                                                                                                                                                                                                                                                                                                                                                                                                                                                                      | Results |
|----|---------------------------------------------------------------------------------------------------------------------------------------------------------------------------------------------------------------------------------------------------------------------------------------------------------------------------------------------------------------------------------------------------------------------------------------------------------------------------------------------------------------------------------------------------------------------------------------------------------------------------------------------------------------|---------|
| 1  | exp eating disorder/                                                                                                                                                                                                                                                                                                                                                                                                                                                                                                                                                                                                                                          | 60880   |
| 2  | exp hyperphagia/                                                                                                                                                                                                                                                                                                                                                                                                                                                                                                                                                                                                                                              | 6826    |
| 3  | ((eat* or feed* or appetite or food*) adj3 (disorder* or syndrome* or addict* or patholog*)).ti,ab,kf,kw,jw.                                                                                                                                                                                                                                                                                                                                                                                                                                                                                                                                                  | 46726   |
| 4  | (anorexi* or bulimi* or (binge eat* adj3 (disorder* or syndrome*)) or (compuls* adj3 eat*) or pica or allotriophag* or geophag* or (ruminat* adj3 (disorder* or syndrome*)) or ((eat* or feed* or appetite or food) adj3 neophob*) or diabulimi* or orthorexi* or (obsess* adj3 health* adj3 (eat* or feed* or appetite or food*)) or (purging adj3 (disorder* or syndrome*)) or (night eat* adj3 (disorder* or syndrome*)) or (((avoid* or restrict* or aversion) adj3 (eat* or feed* or food*)) or ARFID) or merycis* or hyperphag* or overeat* or overfeed* or overindulg* or polyphag* or (emotion* adj2 (eat* or feed*)) or EDNOS or OFSED).ti,ab,kf,kw. | 103318  |
| 5  | exp perfectionism/                                                                                                                                                                                                                                                                                                                                                                                                                                                                                                                                                                                                                                            | 1370    |
| 6  | (perfectionis* or flawlessness or high performan* or (over* adj2 critic*)).ti,ab,kf,kw.                                                                                                                                                                                                                                                                                                                                                                                                                                                                                                                                                                       | 195896  |
| 7  | exp adolescent/                                                                                                                                                                                                                                                                                                                                                                                                                                                                                                                                                                                                                                               | 1713978 |
| 8  | exp young adult/                                                                                                                                                                                                                                                                                                                                                                                                                                                                                                                                                                                                                                              | 483897  |
| 9  | (adolescen* or teen* or youth or juvenile*).ti,ab,kf.                                                                                                                                                                                                                                                                                                                                                                                                                                                                                                                                                                                                         | 635495  |
| 10 | (young adj3 (adult* or person* or individual* or people* or population or man or men or wom#n)).ti,ab,kf,kw.                                                                                                                                                                                                                                                                                                                                                                                                                                                                                                                                                  | 312799  |
| 11 | (youngster* or first grader* or second grader* or third grader* or fourth grader* or fifth-grader* or sixth grader* or seventh grader* or highschool* or high school* or college*).ti,ab,kf.                                                                                                                                                                                                                                                                                                                                                                                                                                                                  | 318500  |
| 12 | ((("13" or "14" or "15" or "16" or "17" or "18") adj1 (year* or yr)).ti,ab,kf,kw.                                                                                                                                                                                                                                                                                                                                                                                                                                                                                                                                                                             | 712695  |
| 13 | or/1-4                                                                                                                                                                                                                                                                                                                                                                                                                                                                                                                                                                                                                                                        | 143958  |
| 14 | or/5-6                                                                                                                                                                                                                                                                                                                                                                                                                                                                                                                                                                                                                                                        | 196131  |
| 15 | or/7-12                                                                                                                                                                                                                                                                                                                                                                                                                                                                                                                                                                                                                                                       | 3047245 |
| 16 | 13 and 14 and 15                                                                                                                                                                                                                                                                                                                                                                                                                                                                                                                                                                                                                                              | 496     |

## EBM Review (Ovid)

| #  | Searches                                                                                                                                                                                                                                                                                                                                                                                                                                                                                                                                                                                                                                                       | Results |
|----|----------------------------------------------------------------------------------------------------------------------------------------------------------------------------------------------------------------------------------------------------------------------------------------------------------------------------------------------------------------------------------------------------------------------------------------------------------------------------------------------------------------------------------------------------------------------------------------------------------------------------------------------------------------|---------|
| 1  | ((eat* or feed* or appetite or food*) adj3 (disorder* or syndrome* or addict* or patholog*)).ti,ab,kf,kw,jw.                                                                                                                                                                                                                                                                                                                                                                                                                                                                                                                                                   | 4292    |
| 2  | (anorexi* or bulimi* or (binge eat* adj3 (disorder* or syndrome*)) or (compuls* adj3 eat*) or pica or allotriophag* or geophag* or (ruminat* adj3 (disorder* or syndrome*)) or ((eat* or feed* or appetite or food*) adj3 neophob*) or diabulimi* or orthorexi* or (obsess* adj3 health* adj3 (eat* or feed* or appetite or food*)) or (purging adj3 (disorder* or syndrome*)) or (night eat* adj3 (disorder* or syndrome*)) or (((avoid* or restrict* or aversion) adj3 (eat* or feed* or food*)) or ARFID) or merycis* or hyperphag* or overeat* or overfeed* or overindulg* or polyphag* or (emotion* adj2 (eat* or feed*)) or EDNOS or OFSED).ti,ab,kf,kw. | 9700    |
| 3  | (perfectionis* or flawlessness or high performan* or (over* adj2 critic*)).ti,ab,kf,kw.                                                                                                                                                                                                                                                                                                                                                                                                                                                                                                                                                                        | 5931    |
| 4  | (adolescen* or teen* or youth or juvenile*).ti,ab,kf.                                                                                                                                                                                                                                                                                                                                                                                                                                                                                                                                                                                                          | 41063   |
| 5  | (young adj3 (adult* or person* or individual* or people* or population or man or men or wom#n)).ti,ab,kf,kw.                                                                                                                                                                                                                                                                                                                                                                                                                                                                                                                                                   | 37714   |
| 6  | (youngster* or first grader* or second grader* or third grader* or fourth grader* or fifth-grader* or sixth grader* or seventh grader* or highschool* or high school* or college*).ti,ab,kf.                                                                                                                                                                                                                                                                                                                                                                                                                                                                   | 22226   |
| 7  | ((("13" or "14" or "15" or "16" or "17" or "18") adj1 (year* or yr)).ti,ab,kf,kw.                                                                                                                                                                                                                                                                                                                                                                                                                                                                                                                                                                              | 81015   |
| 8  | or/1-2                                                                                                                                                                                                                                                                                                                                                                                                                                                                                                                                                                                                                                                         | 11918   |
| 9  | or/4-7                                                                                                                                                                                                                                                                                                                                                                                                                                                                                                                                                                                                                                                         | 160873  |
| 10 | 8 and 3 and 9                                                                                                                                                                                                                                                                                                                                                                                                                                                                                                                                                                                                                                                  | 44      |

## PsycINFO (Ovid)

| #  | Searches                                                                                                                                                                                                                                                                                                                                                                                                                                                                                                                                                                                                                                                    | Results |
|----|-------------------------------------------------------------------------------------------------------------------------------------------------------------------------------------------------------------------------------------------------------------------------------------------------------------------------------------------------------------------------------------------------------------------------------------------------------------------------------------------------------------------------------------------------------------------------------------------------------------------------------------------------------------|---------|
| 1  | exp eating disorders/                                                                                                                                                                                                                                                                                                                                                                                                                                                                                                                                                                                                                                       | 34187   |
| 2  | exp Hyperphagia/                                                                                                                                                                                                                                                                                                                                                                                                                                                                                                                                                                                                                                            | 554     |
| 3  | ((eat* or feed* or appetite or food*) adj3 (disorder* or syndrome* or addict* or patholog*)).ti,ab,id,jw.                                                                                                                                                                                                                                                                                                                                                                                                                                                                                                                                                   | 35215   |
| 4  | (anorexi* or bulimi* or (binge eat* adj3 (disorder* or syndrome*)) or (compuls* adj3 eat*) or pica or allotriophag* or geophag* or (ruminat* adj3 (disorder* or syndrome*)) or ((eat* or feed* or appetite or food*) adj3 neophob*) or diabulimi* or orthorexi* or (obsess* adj3 health* adj3 (eat* or feed* or appetite or food*)) or (purging adj3 (disorder* or syndrome*)) or (night eat* adj3 (disorder* or syndrome*)) or (((avoid* or restrict* or aversion) adj3 (eat* or feed* or food*)) or ARFID) or merycis* or hyperphag* or overeat* or overfeed* or overindulg* or polyphag* or (emotion* adj2 (eat* or feed*)) or EDNOS or OFSED).ti,ab,id. | 37403   |
| 5  | exp perfectionism/                                                                                                                                                                                                                                                                                                                                                                                                                                                                                                                                                                                                                                          | 3015    |
| 6  | (perfectionis* or flawlessness or high performan* or (over* adj2 critic*)).ti,ab,id.                                                                                                                                                                                                                                                                                                                                                                                                                                                                                                                                                                        | 11980   |
| 7  | exp adolescent development/                                                                                                                                                                                                                                                                                                                                                                                                                                                                                                                                                                                                                                 | 64353   |
| 8  | (adolescen* or teen* or youth or juvenile*).ti,ab,id.                                                                                                                                                                                                                                                                                                                                                                                                                                                                                                                                                                                                       | 374981  |
| 9  | (young adj3 (adult* or person* or individual* or people* or population or man or men or wom#n)).ti,ab,id.                                                                                                                                                                                                                                                                                                                                                                                                                                                                                                                                                   | 118725  |
| 10 | (youngster* or first grader* or second grader* or third grader* or fourth grader* or fifth-grader* or sixth grader* or seventh grader* or highschool* or high school* or college*).ti,ab,id.                                                                                                                                                                                                                                                                                                                                                                                                                                                                | 320853  |
| 11 | ((("13" or "14" or "15" or "16" or "17" or "18") adj1 (year* or yr)).ti,ab,id.                                                                                                                                                                                                                                                                                                                                                                                                                                                                                                                                                                              | 115116  |
| 12 | or/1-4                                                                                                                                                                                                                                                                                                                                                                                                                                                                                                                                                                                                                                                      | 56216   |
| 13 | or/5-6                                                                                                                                                                                                                                                                                                                                                                                                                                                                                                                                                                                                                                                      | 12063   |
| 14 | or/7-11                                                                                                                                                                                                                                                                                                                                                                                                                                                                                                                                                                                                                                                     | 788171  |
| 15 | 12 and 13 and 14                                                                                                                                                                                                                                                                                                                                                                                                                                                                                                                                                                                                                                            | 401     |

## CINAHL Complete (EBSCOHost)

| #   | Searches                                                                                                                                                                                                                                                                                                                                                                                                                                                                                                                                                                                                                                                                                                                                                                                                                                                                                                                                                                                                                                                                                                                                                                                                                                                                   | Results |
|-----|----------------------------------------------------------------------------------------------------------------------------------------------------------------------------------------------------------------------------------------------------------------------------------------------------------------------------------------------------------------------------------------------------------------------------------------------------------------------------------------------------------------------------------------------------------------------------------------------------------------------------------------------------------------------------------------------------------------------------------------------------------------------------------------------------------------------------------------------------------------------------------------------------------------------------------------------------------------------------------------------------------------------------------------------------------------------------------------------------------------------------------------------------------------------------------------------------------------------------------------------------------------------------|---------|
| S1  | (MH "Eating Disorders+") OR (MH "Feeding and Eating Disorders of Childhood+")                                                                                                                                                                                                                                                                                                                                                                                                                                                                                                                                                                                                                                                                                                                                                                                                                                                                                                                                                                                                                                                                                                                                                                                              | 21,073  |
| S2  | (MH "Hyperphagia")                                                                                                                                                                                                                                                                                                                                                                                                                                                                                                                                                                                                                                                                                                                                                                                                                                                                                                                                                                                                                                                                                                                                                                                                                                                         | 1,056   |
| S3  | TI ( ((eat* OR feed* OR appetite OR food*) N3 (disorder* OR syndrome* OR addict* OR patholog*)) )<br>OR AB ( ((eat* OR feed* OR appetite OR food*) N3 (disorder* OR syndrome* OR addict* OR patholog*)) )                                                                                                                                                                                                                                                                                                                                                                                                                                                                                                                                                                                                                                                                                                                                                                                                                                                                                                                                                                                                                                                                  | 17,445  |
| S4  | TI ( (anorexi* OR bulimi* OR (binge eat* N3 (disorder* OR syndrome*)) OR (compuls* N3 eat*) OR pica OR allotriophag* OR geophag* OR (ruminat* N3 (disorder* OR syndrome*)) OR ((eat* OR feed* OR appetite OR food) N3 neophob*) OR diabulimi* OR orthorexi* OR (obsess* N3 health* N3 (eat* OR feed* OR appetite OR food*)) OR (purging N3 (disorder* OR syndrome*)) OR (night eat* N3 (disorder* OR syndrome*)) OR (((avoid* OR restrict* OR aversion) N3 (eat* OR feed* OR food*)) OR ARFID) OR merycis* OR hyperphag* OR overeat* OR overfeed* OR overindulg* OR polyphag* OR (emotion* N2 (eat* OR feed*)) OR EDNOS OR OFSED) ) OR AB ( (anorexi* OR bulimi* OR (binge eat* N3 (disorder* OR syndrome*)) OR (compuls* N3 eat*) OR pica OR allotriophag* OR geophag* OR (ruminat* N3 (disorder* OR syndrome*)) OR ((eat* OR feed* OR appetite OR food) N3 neophob*) OR diabulimi* OR orthorexi* OR (obsess* N3 health* N3 (eat* OR feed* OR appetite OR food*)) OR (purging N3 (disorder* OR syndrome*)) OR (night eat* N3 (disorder* OR syndrome*)) OR (((avoid* OR restrict* OR aversion) N3 (eat* OR feed* OR food*)) OR ARFID) OR merycis* OR hyperphag* OR overeat* OR overfeed* OR overindulg* OR polyphag* OR (emotion* N2 (eat* OR feed*)) OR EDNOS OR OFSED) ) | 21,467  |
| S5  | (MH "Perfectionism")                                                                                                                                                                                                                                                                                                                                                                                                                                                                                                                                                                                                                                                                                                                                                                                                                                                                                                                                                                                                                                                                                                                                                                                                                                                       | 402     |
| S6  | TI ( (perfectionis* OR flawlessness OR high performan* OR (over* N2 critic*)) ) OR AB ( (perfectionis* OR flawlessness OR high performan* OR (over* N2 critic*)) )                                                                                                                                                                                                                                                                                                                                                                                                                                                                                                                                                                                                                                                                                                                                                                                                                                                                                                                                                                                                                                                                                                         | 11,506  |
| S7  | (MH "Adolescence+") OR (MH "Adolescent Psychology") OR (MH "Young Adult")                                                                                                                                                                                                                                                                                                                                                                                                                                                                                                                                                                                                                                                                                                                                                                                                                                                                                                                                                                                                                                                                                                                                                                                                  | 722,715 |
| S8  | TI ( (adolescen* OR teen* OR youth OR juvenile*) ) OR AB ( (adolescen* OR teen* OR youth OR juvenile*) )                                                                                                                                                                                                                                                                                                                                                                                                                                                                                                                                                                                                                                                                                                                                                                                                                                                                                                                                                                                                                                                                                                                                                                   | 224,071 |
| S9  | TI ( (young N3 (adult* OR person* OR individual* OR people* OR population OR man OR men OR woman OR women)) ) OR AB ( (young N3 (adult* OR person* OR individual* OR people* OR population OR man OR men OR woman OR women)) )                                                                                                                                                                                                                                                                                                                                                                                                                                                                                                                                                                                                                                                                                                                                                                                                                                                                                                                                                                                                                                             | 95,589  |
| S10 | TI ( (youngster* OR first grader* OR second grader* OR third grader* OR fourth grader* OR fifth-grader* OR sixth grader* OR seventh grader* OR highschool* OR high school* OR college*) ) OR AB ( (youngster* OR first grader* OR second grader* OR third grader* OR fourth grader* OR fifth-grader* OR sixth grader* OR seventh grader* OR highschool* OR high school* OR college*) )                                                                                                                                                                                                                                                                                                                                                                                                                                                                                                                                                                                                                                                                                                                                                                                                                                                                                     | 104,440 |
| S11 | TI ( ( ("13" OR "14" OR "15" OR "16" OR "17" OR "18") N1 (year* OR yr)) ) OR AB ( ( ("13" OR "14" OR "15" OR "16" OR "17" OR "18") N1 (year* OR yr)) )                                                                                                                                                                                                                                                                                                                                                                                                                                                                                                                                                                                                                                                                                                                                                                                                                                                                                                                                                                                                                                                                                                                     | 92,591  |
| S12 | S1 OR S2 OR S3 OR S4                                                                                                                                                                                                                                                                                                                                                                                                                                                                                                                                                                                                                                                                                                                                                                                                                                                                                                                                                                                                                                                                                                                                                                                                                                                       | 37,525  |
| S13 | S5 OR S6                                                                                                                                                                                                                                                                                                                                                                                                                                                                                                                                                                                                                                                                                                                                                                                                                                                                                                                                                                                                                                                                                                                                                                                                                                                                   | 11,573  |
| S14 | S7 OR S8 OR S9 OR S10 OR S11                                                                                                                                                                                                                                                                                                                                                                                                                                                                                                                                                                                                                                                                                                                                                                                                                                                                                                                                                                                                                                                                                                                                                                                                                                               | 936,324 |
| S15 | S12 AND S13 AND S14                                                                                                                                                                                                                                                                                                                                                                                                                                                                                                                                                                                                                                                                                                                                                                                                                                                                                                                                                                                                                                                                                                                                                                                                                                                        | 260     |

**Supplementary Table S3. Studies included in the systematic review.**

| Studies              | Design | Sample |                                          |          |        | Measures                                                      |                                                                            | Results                                                                                                                                                                                                                                                                                                                                                          | Quality assessment total score |
|----------------------|--------|--------|------------------------------------------|----------|--------|---------------------------------------------------------------|----------------------------------------------------------------------------|------------------------------------------------------------------------------------------------------------------------------------------------------------------------------------------------------------------------------------------------------------------------------------------------------------------------------------------------------------------|--------------------------------|
|                      |        | N      | Sample type                              | Mean age | Female | Perfectionism                                                 | EDs                                                                        |                                                                                                                                                                                                                                                                                                                                                                  |                                |
| (Swierczynska, 2022) | A      | 345    | COMT                                     | 12- 16   | 57.4%  | FMPS-PS<br>FMPS-CM<br>FMPS-DA<br>FMPS-PE<br>FMPS-PC<br>FMPS-O | FAQ                                                                        | <u>Cluster analysis</u><br>Group 1 = adapted, Group 2 = egocentric, Group 3= anorectic<br>based on scales of FAQ<br><u>Group comparison</u><br><u>ANOVA and Tukey</u><br>FMPS-PS: $F=4.3^* 2>1$<br>FMPS-CM: $F=24.61^{***} 2>1, 3>1$<br>FMPS-DA: $F=14.26^{***} 2>1, 3>1$<br>FMPS-PE: $F=6.47^{**} 2>1$<br>FMPS-PC: $F=22.96^{***} 2>1, 3>1$<br>FMPS-O: $F=0.33$ | 2 <sup>#</sup>                 |
| (Costa et al., 2022) | A      | 92     | C<br>(AN> 14 yrs old, AN-PP <14 yrs old) | 8-18     | NR     | EDI-II-P                                                      | EDI-II-DT<br>EDI-II-Bu<br>EDI-II-BD<br>EDI-II-IN<br>EDI-II-ID<br>EDI-II-IA | <u>Group comparison</u><br>Prepubertal (AN-PP) vs adolescent (AN)<br>EDI-II-P: AN [6.76 (3.95)] > AN-PP [3.41 (2.58)]                                                                                                                                                                                                                                            | 3 <sup>#</sup>                 |

|                        |   |     |      |    |     |            |                                                                                                                                                 |                                                                                                                                                                                                                                                   |                |
|------------------------|---|-----|------|----|-----|------------|-------------------------------------------------------------------------------------------------------------------------------------------------|---------------------------------------------------------------------------------------------------------------------------------------------------------------------------------------------------------------------------------------------------|----------------|
|                        |   |     |      |    |     |            | EDI-II-MF<br>EDI-II-ASC<br>EDI-II-IR<br>EDI-II-INS<br>EDI-II-total<br>EDE-Q-RT<br>EDE-Q-EaC<br>EDE-Q-SC<br>EDE-Q-WC<br>EDE-Q-total<br>BSQ-Total |                                                                                                                                                                                                                                                   |                |
| (Mohoric et al., 2022) | A | 482 | COMT | 15 | 51% | FMPS-Total | EDE-Q<br>TFEQ-UE<br>TFEQ-CR<br><br>TFEQ-EE                                                                                                      | <u>Correlation</u><br>FMPS/EDEQ = 0.33**<br>FMPS/TFEQ-UE =0.19**<br>FMPS/TFEQ-CR =0.24**<br>FMPS/TFEQ-EE =0.22**<br><br><u>Mediation path analysis</u><br>FMPS/EDEQ $\beta$ = 0.12*<br>FMPS/TFEQ-UE $\beta$ =0.11<br>FMPS/TFEQ-CR $\beta$ =0.30** | 4 <sup>#</sup> |

|                               |   |                           |                      |                             |       |              |                                             |                                                                                                                                                                                |                |
|-------------------------------|---|---------------------------|----------------------|-----------------------------|-------|--------------|---------------------------------------------|--------------------------------------------------------------------------------------------------------------------------------------------------------------------------------|----------------|
|                               |   |                           |                      |                             |       |              |                                             | FMPS/TFEQ-EE $\beta=0.15^*$                                                                                                                                                    |                |
| (Cresswell et al., 2022)*     | A | 149                       | C (AN, AN-B, UNSFED) | 14.9 (0.83) (13-17)         | 100%  | EDI-III-P    | ChEDE<br>Total                              | <u>Correlation</u><br>EDI-P/EDEtotal = 0.30***<br><br><u>Mediation path analysis after controlling for compulsive exercise</u><br><br>EDI-P/EDEtotal $\beta=0.30^*$ , SE= 0.11 | 6 <sup>#</sup> |
| (Pamies-Aubalat et al., 2022) | A | 1630                      | COMT                 | 14 (1.34)                   | 54.6% | CAPS         | EAT-40<br><br>EDI-II-BD                     | <u>Clusters created from all variables</u><br><br>Correlations<br>CAPS/EAT-40 = NR<br><br>CAPS/EDI-BD = NR                                                                     | 4 <sup>#</sup> |
| (Pauls et al., 2022)          | A | AAN = 42<br><br>AN-R = 79 | C (AAN, AN-R)        | AAN = 15.93<br>AN-R = 15.63 |       | EDI-III-P    | EDI-III-DT<br>EDI-III-BD<br><br>EDI-III-LSE | <u>Group comparison between two types of diagnosis</u><br><br>EDI-III-P = NR                                                                                                   | 6 <sup>#</sup> |
| (Schilder et al., 2021)       | A | 386                       | C                    | 14.69                       | 98.1% | EDI-II-P-SOP | EDE                                         | EDI-P/EDE = NR                                                                                                                                                                 | 5 <sup>#</sup> |
| (Schlegl et al., 2021)        | A | 1071                      | C (AN, BN)           | AN = 15.53<br>BN = 16.01    |       | EDI-II-P     | EDI-II                                      | <u>Network Analysis</u><br>removed items and doesn't report scores or associations                                                                                             | 7 <sup>#</sup> |

|                           |   |     |                |                                |       |                                                                             |                                                   |                                                                                                                                                                                                                 |                |
|---------------------------|---|-----|----------------|--------------------------------|-------|-----------------------------------------------------------------------------|---------------------------------------------------|-----------------------------------------------------------------------------------------------------------------------------------------------------------------------------------------------------------------|----------------|
|                           |   |     |                |                                |       |                                                                             |                                                   | perfectionism is identified as a core concept in the network of EDI-II                                                                                                                                          |                |
| (Sepulveda et al., 2021)* | A | 100 | C (EDs)<br>COM | ED = 14.68<br><br>COMT = 14.66 | 100%  | EDI-II-P<br><br>CAPS-SOP<br>CAPS-SPP                                        | EDI II                                            | <u>ED averages</u><br>EDI-P = 4.06 (3.70)<br>CAPS-SOP = 39.11 (10.95)<br>CAPS-SPP = 21.60 (8.97)<br><br><u>COMT averages</u><br>EDI-P = 3.50 (3.36)<br>CAPS-SOP = 32.96 (7.81)<br><br>CAPS-SPP = 24.29 (7.83)   | 6 <sup>#</sup> |
| (Sander et al., 2021)     | A | 320 | C (EDs)        | 16.98                          | 100 % | CR-EAT-P                                                                    | EDE-Q<br><br>BMI<br><br>SEED                      | <u>Sample characteristics</u><br><br>Participants reported elevated perfectionism<br><br>- CR-EAT-P: M = 3.78 (1.12)<br>- EDE-Q: M = 2.87 (1.82)<br>- CR-EAT/EDE-Q: NR<br>- CR-EAT/BMI: NR<br>- CR-EAT/SEED: NR | 5 <sup>#</sup> |
| (Swierczynska, 2020)*     | A | 345 | COMT           | NR high school                 | 57%   | FMPS-CM<br>FMPS-PS<br>FMPS-PE<br>FMPS-PC<br>FMPS-DA<br>FMPS-O<br>FMPS-Total | FAQ-WR<br>FAQ-AF<br>FAQ-PS<br>FAQ-PA<br>FAQ-Total | <u>Correlations</u><br>FMPS-CM/FAQ-WR = 0.204**<br>FMPS-CM/FAQ-AF = 0.214**<br>FMPS-CM/FAQ-PS = 0.311**                                                                                                         | 2 <sup>#</sup> |

|  |  |  |  |  |  |  |  |                                |  |
|--|--|--|--|--|--|--|--|--------------------------------|--|
|  |  |  |  |  |  |  |  | FMPS-CM/FAQ-PA =<br>0.378**    |  |
|  |  |  |  |  |  |  |  | FMPS-CM/FAQ-Total =<br>0.434** |  |
|  |  |  |  |  |  |  |  | FMPS-PS/FAQ-WR =<br>0.099      |  |
|  |  |  |  |  |  |  |  | FMPS-PS/FAQ-AF =<br>0.136*     |  |
|  |  |  |  |  |  |  |  | FMPS-PS/FAQ-PS =<br>0.239**    |  |
|  |  |  |  |  |  |  |  | FMPS-PS/FAQ-PA =<br>0.107*     |  |
|  |  |  |  |  |  |  |  | FMPS-PS/FAQ-Total =<br>0.193** |  |
|  |  |  |  |  |  |  |  | FMPS-PE/FAQ-WR =<br>0.155**    |  |
|  |  |  |  |  |  |  |  | FMPS-PE/FAQ-AF =<br>0.102      |  |
|  |  |  |  |  |  |  |  | FMPS-PE/FAQ-PS =<br>0.239**    |  |
|  |  |  |  |  |  |  |  | FMPS-PE/FAQ-PA =<br>0.055      |  |
|  |  |  |  |  |  |  |  | FMPS-PE/FAQ-Total =<br>0.177** |  |
|  |  |  |  |  |  |  |  | FMPS-PC/FAQ-WR =<br>0.216**    |  |
|  |  |  |  |  |  |  |  | FMPS-PC/FAQ-AF =<br>0.132*     |  |
|  |  |  |  |  |  |  |  | FMPS-PC/FAQ-PS =<br>0.347**    |  |
|  |  |  |  |  |  |  |  | FMPS-PC/FAQ-PA =<br>0.247**    |  |
|  |  |  |  |  |  |  |  | FMPS-PC/FAQ-Total =<br>0.348** |  |

|                      |   |     |        |            |       |      |     |                                                                                                                                                                                                                                                                                                                                                                                                                                                             |                 |
|----------------------|---|-----|--------|------------|-------|------|-----|-------------------------------------------------------------------------------------------------------------------------------------------------------------------------------------------------------------------------------------------------------------------------------------------------------------------------------------------------------------------------------------------------------------------------------------------------------------|-----------------|
|                      |   |     |        |            |       |      |     | FMPS-DA/FAQ-WR = 0.158**<br>FMPS-DA/FAQ-AF = 0.122*<br>FMPS-DA/FAQ-PS = 0.202**<br>FMPS-DA/FAQ-PA = 0.315**<br>FMPS-DA/FAQ-Total = 0.326**<br><br>FMPS-O/FAQ-WR = - 0.016<br>FMPS-O/FAQ-AF = 0.049<br>FMPS-O/FAQ-PS = - 0.030<br>FMPS-O/FAQ-PA = - 0.019<br>FMPS-OFAQ-Total = - 0.011<br><br>FMPS-Total/FAQ-WR = 0.225**<br>FMPS-Total/FAQ-AF = 0.218**<br>FMPS-Total/FAQ-PS = 0.357**<br>FMPS-Total/FAQ-PA = 0.315**<br><br>FMPS-Total/FAQ-Total = 0.417** |                 |
| (Welch et al., 2020) | B | 158 | C (AN) | 15.3 (1.8) | 89.2% | FMPS | EDE | <u>Regression</u><br>Only reports values across timepoints within one                                                                                                                                                                                                                                                                                                                                                                                       | 3 <sup>##</sup> |

|                                   |   |     |         |       |            |                                 |                                                                              |                                                                                                                                                                                                                                 |                |
|-----------------------------------|---|-----|---------|-------|------------|---------------------------------|------------------------------------------------------------------------------|---------------------------------------------------------------------------------------------------------------------------------------------------------------------------------------------------------------------------------|----------------|
|                                   |   |     |         |       |            |                                 |                                                                              | <p>group. Baseline perfectionism is a predictor of EDE in the future.</p> <p>FMPS adaptive/EDE = NR</p> <p>FMPS maladaptive/EDE = NR</p>                                                                                        |                |
| (Jones et al., 2020)*             | A | 270 | C (EDs) | 14.86 | 95.2 %0.38 | EDI-P-III                       | <p>DSM-5</p> <p>ChEDE-EC</p> <p>ChEDE-SC</p> <p>ChEDE-WC</p> <p>ChEDE-RT</p> | <p><u>Pearson correlation matrix</u></p> <ul style="list-style-type: none"> <li>- EDI-P/ChEDE-EC: 0.34***</li> <li>- EDI-P/ChEDE-SC: 0.36***</li> <li>- EDI-P/ChEDE-WC: 0.34***</li> <li>- EDI-P/ChEDE-RT: 0.28***</li> </ul>   | 6 <sup>#</sup> |
| (Petisco-Rodriguez et al., 2020)* | A | 120 | COMT    | 17.2  | 100%       | <p>CAPS-SOP</p> <p>CAPS-SPP</p> | <p>SCOFF</p> <p>EAT-40</p> <p>BMI</p>                                        | <p><u>Multiple linear regression:</u></p> <ul style="list-style-type: none"> <li>- CAPS-SOP/SCOFF : B = -0.11, t = -0.95 (NS)</li> <li>- CAPS-SPP/SCOFF : B = 0.23, t = 2.07 *</li> </ul> <p><u>Spearman's Correlations</u></p> | 2 <sup>#</sup> |

|                      |   |     |             |            |       |           |                                                     |                                                                                                                                                                                                                                                                                                                                                                                                                                                                                            |                 |
|----------------------|---|-----|-------------|------------|-------|-----------|-----------------------------------------------------|--------------------------------------------------------------------------------------------------------------------------------------------------------------------------------------------------------------------------------------------------------------------------------------------------------------------------------------------------------------------------------------------------------------------------------------------------------------------------------------------|-----------------|
|                      |   |     |             |            |       |           |                                                     | <ul style="list-style-type: none"> <li>- CAPS-SOP/EAT-40 = NR</li> <li>- CAPS-SOP/EAT-Sub 1 = 0.05 (NS)</li> <li>- CAPS-SOP/EAT-Sub 2 = -0.16 (NS)</li> <li>- CAPS-SOP/EAT-Sub 3 = -0.03 (NS)</li> <li>- CAPS-SOP/SCOFF = -0.11 (NS)</li> <li>- CAPS-SPP/EAT-40 = NR</li> </ul> <p>CAPS-SPP/EAT-Sub 1 = 0.015 (NS)</p> <ul style="list-style-type: none"> <li>- CAPS-SPP/EAT-Sub 2 = 0.06 (NS)</li> <li>- CAPS-SPP/EAT-Sub 3 = 0.16 (NS)</li> <li>- CAPS-SPP/SCOFF = -0.11 (NS)</li> </ul> |                 |
| (Obeid et al., 2020) | A | 178 | C (EDs)     | 15.73      | 86.6% | EDI-III-P | DSM-IV<br>DSM-V<br>BMI<br>EDI-III-ASC<br>EDI-III-OC | t-test: EDI-III-P: BED > Restrictive ED*                                                                                                                                                                                                                                                                                                                                                                                                                                                   | 3 <sup>#</sup>  |
| (Shu et al., 2019)   | B | 94  | COMT (perf) | 16.2 (1.8) | 100%  | CPQ       | EDE-Q                                               | <u>Perfectionism intervention study</u><br>CPQ/EDE-Q = NR<br><br>Only time variations are reported (pre-post intervention) and between                                                                                                                                                                                                                                                                                                                                                     | 5 <sup>##</sup> |

|                                |   |     |                |                        |        |                      |                           | groups (perf intervention or not)                                                                                                                                                                                                                                                                                                            |                 |
|--------------------------------|---|-----|----------------|------------------------|--------|----------------------|---------------------------|----------------------------------------------------------------------------------------------------------------------------------------------------------------------------------------------------------------------------------------------------------------------------------------------------------------------------------------------|-----------------|
| (Blasczyk-Schiep et al., 2019) | B | 98  | COMT           | 17.65 (0.47)<br>17- 18 | 71.42% | EDI-II-P             | EDI-II                    | <u>Correlation</u><br>EDI-II-P/EDI-II: NR                                                                                                                                                                                                                                                                                                    | 4 <sup>##</sup> |
| (Christian et al., 2019)       | B | 332 | COMT           | 15.21 (0.59)           | 100%   | FMPS                 | EDE-Q<br>EDI-II<br>IBSS-R | <u>Pre-post intervention repeated measure ANOVA</u><br><br><u>Correlations</u><br>NR                                                                                                                                                                                                                                                         | 5 <sup>##</sup> |
| (Ramon-Jarne et al., 2019)     | A | 493 | COMT           | 14.8 (1.7)             | 54.8%  | EDI-II-P             | EDI-II                    | <u>Correlation</u><br>EDI-II-P/EDI = NR                                                                                                                                                                                                                                                                                                      | 6 <sup>#</sup>  |
| (Flamarique et al., 2019)*     | A | 154 | COMT<br>C (AN) | NR                     | 83%    | CAPS-SOP<br>CAPS-SPP | DSM-IV-TR<br>EAT-40       | <u>One-way ANOVA:</u><br>- CAPS-SOP: AN > HC***<br>- CAPS-SPP: AN > HC***<br><br><u>Hierarchical multiple regression analyses:</u><br><u>AN</u><br>- CAPS-SOP/EAT-40: $\beta = 0.94^{***}$<br>- CAPS-SPP/EAT-40: $\beta = 0.06$ (NS)<br><br><u>COMT</u><br>- CAPS-SOP/EAT-40: $\beta = -0.08$ (NS)<br>- CAPS-SPP/EAT-40: $\beta = 0.18^{**}$ | 5 <sup>#</sup>  |
| (Keery et al., 2019)           | A | 193 | C (ARFID, AN)  | 13.75                  | 44%    | CPQ                  | DSM V BMI                 | <u>t-test:</u> CPQ: AN > ARFID***                                                                                                                                                                                                                                                                                                            | 6 <sup>#</sup>  |

|                          |   |      |      |       |     |                                                                                       |                                                                               |                                                                                                                                                                                                                                                                                                                                         |                |
|--------------------------|---|------|------|-------|-----|---------------------------------------------------------------------------------------|-------------------------------------------------------------------------------|-----------------------------------------------------------------------------------------------------------------------------------------------------------------------------------------------------------------------------------------------------------------------------------------------------------------------------------------|----------------|
|                          |   |      |      |       |     |                                                                                       | EDE<br>(global<br>score)<br>EDE-RT<br>EDE-<br>EAC<br>EDE-SC<br>EDE-<br>WC     |                                                                                                                                                                                                                                                                                                                                         |                |
| (Stornaes et al., 2019)* | A | 832  | COMT | NR    | 53% | FMPS-PS<br>FMPS-CM<br>FMPS-DA<br>FMPS-PE<br>FMPS-PC<br>FMPS-O<br>CAPS-SOP<br>CAPS-SPP | EDE-Q-<br>WSC                                                                 | <u>Pearson's correlation:</u><br>- EDE-Q-WSC/FMPS-PS: $r=0.12^*$<br>- EDE-Q-WSC/FMPS-CM: $r=0.35^{**}$<br>- EDE-Q-WSC/FMPS-DA: $r=0.32^{**}$<br>- EDE-Q-WSC/FMPS-PE: $r=0.16$ (NS)<br>- EDE-Q-WSC/FMPS-PC: $r=0.24$ (NS)<br>- EDE-Q-WSC/FMPS-O: $r=-0.01$<br>- EDE-Q-WSC/CAPS-SOP: $r=0.19^{**}$<br>- EDE-Q-WSC/CAPS-SPP: $r=0.27^{**}$ | 4 <sup>#</sup> |
| (Cella et al., 2019)     | A | 1156 | COMT | 15.61 | 55% | FMPS (global<br>score)<br>FMPS-PS<br>FMPS-DA<br>FMPS-CM<br>FMPS-PE<br>FMPS-O          | BMI<br>EDI-III-<br>Risk<br>EDI-III-<br>DT<br>EDI-III-<br>BN<br>EDI-III-<br>BD | <u>Structural equation<br/>modeling:</u><br>Maladaptive and adaptive<br>perfectionism have no<br>influence on the EDI-III-<br>Risk.                                                                                                                                                                                                     | 3 <sup>#</sup> |

|                             |   |      |         |       |       |                      |                                            |                                                                                                                                                                                                                                                   |                 |
|-----------------------------|---|------|---------|-------|-------|----------------------|--------------------------------------------|---------------------------------------------------------------------------------------------------------------------------------------------------------------------------------------------------------------------------------------------------|-----------------|
| (Magson et al., 2019)*      | A | 510  | COMT    | 11.2  | 49.7% | CAPS-SOP<br>CAPS-SPP | ChEAT<br>(global<br>score)                 | <u>Pearson's correlation:</u><br>- CAPS-SOP/ChEAT: $r = 0.22^{**}$<br>- CAPS-SPP/ChEAT: $r = 0.20^{**}$                                                                                                                                           | 2 <sup>#</sup>  |
| (Drieberg et al., 2019)*    | A | 231  | C (EDs) | 14.5  | 100%  | EDI-III-P            | DSM V<br>AdoED<br>E (global<br>score)      | <u>Pearson's correlation:</u><br>- EDI-III-P/AdoEDE<br>global score: $r = 0.35^{**}$                                                                                                                                                              | 4 <sup>#</sup>  |
| (Morgan-Lowes et al., 2019) | B | 167  | C       | 14.57 | 100%  | EDI-III-P            | DSM V<br>ChEDE<br>(global<br>score)<br>BMI | <u>Pearson's correlation:</u><br>- EDI-III-<br>P(intake)/BMI(intake)<br>: $r=0.25^{**}$<br>- EDI-III-<br>P(intake)/BMI(6<br>months): $r=0.23^{**}$<br>- EDI-III-<br>P(intake)/BMI(12<br>months): $r=0.20^*$                                       | 6 <sup>##</sup> |
| (Plumed et al., 2019)*      | B | 7167 | COMT    | 13.66 | 52.3% | EDI-III-P            | chEAT<br><br>BMI                           | <u>Correlation</u><br><br><i>Girls:</i><br>- chEAT(baseline)/EDI<br>-P = $0.280^{**}$<br>- chEAT (2 years)/EDI-<br>P = $0.177^{**}$<br><br><i>Boys:</i><br>- chEAT(baseline)/EDI<br>-P = $0.295^{**}$<br>- chEAT(2years)/EDI-<br>P = $0.183^{**}$ | 5 <sup>##</sup> |

|                                  |   |      |        |            |       |                                   |                            |                                                                                                                                                                                                                                                                                        |                 |
|----------------------------------|---|------|--------|------------|-------|-----------------------------------|----------------------------|----------------------------------------------------------------------------------------------------------------------------------------------------------------------------------------------------------------------------------------------------------------------------------------|-----------------|
| (Hurst & Zimmer-Gembeck, 2019)   | B | 21   | C (AN) | 14.9 (1.2) | 100%  | CAPS-SOP<br>CAPS-SPP<br>EDI-III-P | EDI-III-<br>total<br>EDE-Q | <u>Correlation of change pre-post CBT-P</u><br>CAPS-SOP/EDI-total =0.65**<br>CAPS-SPP/EDI-total =0.66**<br>EDI-III-P/EDI-total =0.48*<br><br><u>Correlation of change pre-post treatment</u><br>CAPS-SOP/EDI-total =0.63**<br>CAPS-SPP/EDI-total =0.68**<br>EDI-III-P/EDI-total =0.54* | 5 <sup>##</sup> |
| (Gan et al., 2018)*              | A | 356  | COMT   | 14.3 (1.0) | 57.3% | PSS                               | BINE                       | <u>Simple linear regression</u><br>PSS/BINE: $\beta = 0.065$ ,<br>$t=1.232$ , $p = 0.219$                                                                                                                                                                                              | 4 <sup>#</sup>  |
| (Gonzalez et al., 2018)*         | A | 455  | COMT   | 13.3 (0.6) | 51.2% | EDI-II-P                          | EAT-26                     | <u>Portugal</u><br><i>Girls</i><br>EDI-II-P/EAT-26 =0.01<br><i>Boys</i><br>EDI-II-P/EAT-26 = -0.03<br><br><u>Spain</u><br><i>Girls</i><br>EDI-II-P/EAT-26 = 0.38***<br><i>Boys</i><br>EDI-II-P/EAT-26 = 0.14                                                                           | 2 <sup>#</sup>  |
| (Warschburger & Zitzmann, 2018)* | B | 1112 | COMT   | 13 (0.8)   | 49%   | EDI-II-P                          | EAT-26<br><br>EDI-II-Bu    | <u>Pearson correlations:</u><br>EDI-II-P/EAT-26 = 0.30**                                                                                                                                                                                                                               | 5 <sup>##</sup> |

|                          |   |     |                   |       |       |                                |                                                                    |                                                                                                                                                                                                                                                                      |                |
|--------------------------|---|-----|-------------------|-------|-------|--------------------------------|--------------------------------------------------------------------|----------------------------------------------------------------------------------------------------------------------------------------------------------------------------------------------------------------------------------------------------------------------|----------------|
|                          |   |     |                   |       |       |                                | EDI-II-DT<br>EDI-II-BD<br><br>SATAQ-ITI<br>SATAQ-MP                | EDI-II-P/EDI-II-Bu = 0.25**<br>EDI-II-P/EDI-II-DT = 0.25**<br>EDI-II-P/EDI-II-BD = 0.15**<br>EDI-II-P/SATAQ-ITI = 0.22**<br>EDI-II-P/SATAQ-MP = 0.27**                                                                                                               |                |
| (Campbell et al., 2018)* | B | 284 | COMT              | 14.1  | 58%   | FMPS-CM<br>FMPS-DAA<br>FMPS-EC | EDI-II (global score)                                              | <i>Study 1</i><br><u>Structural equation modeling:</u><br>FMPS-EC/EDI-II: $\beta = .45^{***}$<br><br><i>Study 2</i><br><u>Latent change modeling:</u><br>Change in perfectionism (FMPS-EC) linked to change in EDI-II (global score)                                 | 4 <sup>#</sup> |
| (Curzio et al., 2018)*   | A | 419 | C (AN, BN, EDNOS) | 14.83 | 86.2% | EDI-III-P<br>CAPS-SOP          | DSM-IV-TR<br>EDI-III-BN<br>EDI-III-BD<br>EDE-RT<br>EDE - SC<br>BUT | <u>Pearson's correlation:</u><br><i>AN</i><br>- EDI-III-BN/EDI-III-P: $r=0.427^{***}$<br>- EDI-III-BN/CAPS-SOP: $r=0.195^{**}$<br>- EDE-RT/EDI-III-P: $r=0.119$ (NS)<br>- EDE-RT/CAPS-SOP: $r=0.095$ (NS)<br><br><i>BN</i><br>- EDI-III-BN/EDI-III-P: $r=0.468^{**}$ | 4 <sup>#</sup> |

|                           |   |     |                 |       |       |           |                                                                        |                                                                                                                                                                                                                                                                                                                                                                                                                                                                                                               |                |
|---------------------------|---|-----|-----------------|-------|-------|-----------|------------------------------------------------------------------------|---------------------------------------------------------------------------------------------------------------------------------------------------------------------------------------------------------------------------------------------------------------------------------------------------------------------------------------------------------------------------------------------------------------------------------------------------------------------------------------------------------------|----------------|
|                           |   |     |                 |       |       |           |                                                                        | <ul style="list-style-type: none"> <li>- EDI-III-BN/CAPS-SOP: <math>r=0.284^*</math></li> <li>- EDE-RT/EDI-III-P: <math>r=0.013</math> (NS)</li> <li>- EDE-RT/CAPS-SOP: <math>r=0.235</math> (NS)</li> </ul> <p><i>EDNOS</i></p> <ul style="list-style-type: none"> <li>- EDI-III-BN/EDI-III-P: <math>r=0.702^{***}</math></li> <li>- EDI-III-BN/CAPS-SOP: <math>r=0.342^{***}</math></li> <li>- EDE-RT/EDI-III-P: <math>r=0.259^{**}</math></li> <li>- EDE-RT/CAPS-SOP: <math>r=0.219^{**}</math></li> </ul> |                |
| (Dakanalis et al., 2018)* | A | 272 | C (BN)          | 15.3  | 94.2% | EDI-III-P | EDE-I<br>YBCED<br>S<br>EDE-BE<br>EDE-RT<br>EDE-EAC<br>EDE-SC<br>EDE-WC | <u>ANOVA</u> :<br>EDI-III-P: BN mild severity > BN moderate severity > BN severe severity > BN extreme severity***                                                                                                                                                                                                                                                                                                                                                                                            | 4 <sup>#</sup> |
| (Elizathe et al., 2018)*  | A | 100 | COMT<br>C (OWC) | 10.85 | 37%   | CPI       | DSM IV<br>EDE-I<br>BMI<br>ChEAT (global score)<br>CH/ASR<br>S-BD       | <u>t-test</u> : CPI: C > COMT**                                                                                                                                                                                                                                                                                                                                                                                                                                                                               | 4 <sup>#</sup> |

|                                        |   |     |      |                                                  |      |                      |                                                         |                                                                                                                                                                                                                                                                                                    |                 |
|----------------------------------------|---|-----|------|--------------------------------------------------|------|----------------------|---------------------------------------------------------|----------------------------------------------------------------------------------------------------------------------------------------------------------------------------------------------------------------------------------------------------------------------------------------------------|-----------------|
| (Izydorczyk & Sitnik-Warchulska, 2018) | A | 234 | COMT | 14.0 (95)<br>18.2 (33)<br>25.5 (56)<br>35.5 (50) | 100% | EDI-P                | BMI<br>SATPA<br>BI<br>EDI (polish)<br>-BD<br>-DT<br>-BN | <u>ANOVA</u><br><i>Difference in 4 age groups</i><br>- EDI-P: $F(3,230)=21.79^{***}$ , $1>2,3,4$<br>- EDI-DT: $F(3,230)=13.33^{***}$ , $1>2,3,4$<br>- EDI-BN: $F(3,230)=9.78^{***}$ , $1>2,3,4$<br>- EDI-BD: $F(3,230)=42.60^{***}$ , $1>2,3,4$                                                    | 4 <sup>#</sup>  |
| (Johnston et al., 2018)                | B | 175 | C    | 14.47                                            | 91%  | EDI-III-P            | DSM V<br>ChEDE (global score)<br>BMI                    | <u>Mixed Models</u><br>Perfectionism as a predictor of remission at 12-months review: higher EDI-P at intake predicted a lower likelihood of remission at 12 months; $\beta = -0.55^*$                                                                                                             | 6 <sup>##</sup> |
| (Rosewall et al., 2018)*               | A | 231 | COMT | 15.5                                             | 100% | CAPS<br>-SOP<br>-SPP | BMI<br>EAT-26<br>SBFD<br><br>EDI<br>-BD                 | <u>Correlation</u><br>- CAPS-SOP/BMI: $r=0.07$ (NS)<br>- CAPS-SPP/BMI: $r=0.13$ (NS)<br>- CAPS-SOP/EAT-26: $r=0.32^{**}$<br>- CAPS-SPP/EAT-26: $r=0.36^{**}$<br>- CAPS-SOP/SBFD: $r=0.16^*$<br>- CAPS-SPP/SBFD: $r=0.24^{**}$<br>- CAPS-SOP/EDI-BD: $r=0.15^*$<br>- CAPS-SPP/EDI-BD: $r=0.24^{**}$ | 3 <sup>#</sup>  |

|                              |   |      |      |       |       |         |                                                                                              |                                                                                                                                                                                                                                                                                                                                                                                                                                                                                                                                                                                                                               |                 |
|------------------------------|---|------|------|-------|-------|---------|----------------------------------------------------------------------------------------------|-------------------------------------------------------------------------------------------------------------------------------------------------------------------------------------------------------------------------------------------------------------------------------------------------------------------------------------------------------------------------------------------------------------------------------------------------------------------------------------------------------------------------------------------------------------------------------------------------------------------------------|-----------------|
| (Shahyad et al., 2018)       | A | 477  | COMT | 15-17 | 100%  | APS     | EDI<br>MBSRQ<br>-AE<br>SATAQ<br>-4                                                           | <u>Structural equation modeling</u><br>- APS/EDI: $\beta = 0.67^*$<br>- APS/MBSRQ-AE: $\beta = -0.64^*$<br>- APS/SATAQ-4: NR                                                                                                                                                                                                                                                                                                                                                                                                                                                                                                  | 4 <sup>#</sup>  |
| (Sehm & Warschburger, 2018)* | B | 1039 | COMT | 14.37 | 51.3% | EDI-C-P | BMI-<br>SDS<br>ChEDE-<br>BE<br>ChEDE-<br>WSC<br>ChEDE-<br>RT<br>EDI-C-<br>IA<br>SATAQ<br>-GI | <u>Cross-lagged panel design, bivariate analyses:</u><br>EDI-C-P is not longitudinally associated with ChEDE-BE<br><br><u>Pearson's correlation:</u><br><i>Boys</i><br>- ChEDE-BE/EDI-C-P (baseline): $r = -0.02$ (NS)<br>- ChEDE-WSC/EDI-C-P (baseline): $r = 0.16^*$<br>- ChEDE-RT/EDI-C-P (baseline): $r = 0.16^*$<br>- EDI-C-P/EDI-C-IA (baseline): $r = 0.35^*$<br>- EDI-C-P/SATAQ-GI (baseline): $r = 0.4^*$<br>- ChEDE-BE/EDI-C-P (20 months): $r = 0.00$ (NS)<br>- ChEDE-WSC/EDI-C-P (20 months): $r = 0.08$ (NS)<br>- ChEDE-RT /EDI-C-P (20 months): $r = 0.02$ (NS)<br>- EDI-C-P/EDI-C-IA (20 months): $r = 0.29^*$ | 4 <sup>##</sup> |

|                          |   |     |             |       |      |                     |                                                            |                                                                                                                                                                                                                                                                                                                                                                                                                                                                                                                                                                                                                                                                                                                                                                                                                                                |                |
|--------------------------|---|-----|-------------|-------|------|---------------------|------------------------------------------------------------|------------------------------------------------------------------------------------------------------------------------------------------------------------------------------------------------------------------------------------------------------------------------------------------------------------------------------------------------------------------------------------------------------------------------------------------------------------------------------------------------------------------------------------------------------------------------------------------------------------------------------------------------------------------------------------------------------------------------------------------------------------------------------------------------------------------------------------------------|----------------|
|                          |   |     |             |       |      |                     |                                                            | <ul style="list-style-type: none"> <li>- EDI-C-P/SATAQ-GI (20 months): <math>r=0.3^*</math></li> </ul> <p><i>Girls</i></p> <ul style="list-style-type: none"> <li>- ChEDE-BE/EDI-C-P (baseline): <math>r=0.09^*</math></li> <li>- ChEDE-WSC/EDI-C-P (baseline): <math>r=0.30^*</math></li> <li>- ChEDE-RT</li> <li>- /EDI-C-P (baseline): <math>r=0.21^*</math></li> <li>- EDI-C-P/EDI-C-IA (baseline): <math>r=0.40^*</math></li> <li>- EDI-C-P/SATAQ-GI (baseline): <math>r=0.32^*</math></li> <li>- ChEDE-BE/EDI-C-P (20 months): <math>r=0.16^*</math></li> <li>- ChEDE-WSC/EDI-C-P (20 months): <math>r=0.43^*</math></li> <li>- ChEDE-RT</li> <li>- /EDI-C-P (20 months): <math>r=0.38^*</math></li> <li>- EDI-C-P/EDI-C-IA (20 months): <math>r=0.42^*</math></li> <li>- EDI-C-P/SATAQ-GI (20 months): <math>r=0.42^*</math></li> </ul> |                |
| (van Noort et al., 2018) | A | 120 | COMT C (AN) | 14.01 | 100% | FMPS (global score) | BMI<br>ChEDE-Q (global score)<br>ChEDE-Q-RT<br>ChEDE-Q-EAC | <u>One-way ANOVA:</u><br>FMPS (global score):<br>1) EO-AN>AO-AN***<br>2) No difference between EO-AN and EO-HC<br>3) AO-AN>AO-HC***                                                                                                                                                                                                                                                                                                                                                                                                                                                                                                                                                                                                                                                                                                            | 6 <sup>#</sup> |

|                          |   |       |                   |       |     |         |                                                                                                                                                                                   |                                                                                                                                 |                 |
|--------------------------|---|-------|-------------------|-------|-----|---------|-----------------------------------------------------------------------------------------------------------------------------------------------------------------------------------|---------------------------------------------------------------------------------------------------------------------------------|-----------------|
|                          |   |       |                   |       |     |         | ChEDE-<br>Q-WC<br>ChEDE-<br>Q-SC<br>AdoED<br>E-Q<br>(global<br>score)<br>AdoED<br>E-Q-RT<br>AdoED<br>E-Q-<br>EAC<br>AdoED<br>E-Q-WC<br>AdoED<br>E-Q-SC<br>ABOS<br>SIAB-<br>EX-BID |                                                                                                                                 |                 |
| (Wilksch et al., 2017)   | B | 1,316 | COMT              | 13.21 | 64% | MPS-P   | EDE-<br>WC<br>EDE-SC<br>EDE-EC<br>DUBC-<br>Diet<br>EDI-BD<br>EAT-<br>RA                                                                                                           | <u>Linear mixed models:</u><br>MPS-P and eating : NR                                                                            | 5 <sup>##</sup> |
| (Levallius et al., 2017) | B | 3116  | C (AN, BN, EDNOS) | 15.40 | 48% | SASB-NP | BMI<br>AdoED<br>E-Q<br>(global<br>score)<br>AdoED<br>E-Q-RT                                                                                                                       | <u>t tests:</u><br><i>All Girls</i><br>- SASB-NP:<br>Compulsive Exercise<br>(CE) > non-CE***<br><br><i>Girls Clinical Group</i> | 7 <sup>##</sup> |

|                                |   |     |                   |       |     |                                                         |                                                                                                                    |                                                                                                                                                                                                                                                                                                                               |                 |
|--------------------------------|---|-----|-------------------|-------|-----|---------------------------------------------------------|--------------------------------------------------------------------------------------------------------------------|-------------------------------------------------------------------------------------------------------------------------------------------------------------------------------------------------------------------------------------------------------------------------------------------------------------------------------|-----------------|
|                                |   |     |                   |       |     |                                                         | AdoED<br>E-Q-PG<br>AdoED<br>E-Q-BE                                                                                 | <ul style="list-style-type: none"> <li>- SASB-NP: CE&gt;non-CE***</li> </ul> <i>All Boys</i> <ul style="list-style-type: none"> <li>- SASB-NP: CE&gt;non-CE*</li> </ul> <i>Boys Clinical Group</i> <ul style="list-style-type: none"> <li>- SASB-NP: no difference between CE and non-CE (NS)</li> </ul>                      |                 |
| (Vall & Wade, 2017)            | B | 40  | C (AN)            | 15.40 | 95% | FMPS-CM<br>FMPS-PS                                      | BMI<br>EDE-Q<br>(Global score)<br>EDE-Q-PG<br>EDE-Q-EX                                                             | <u>linear mixed models:</u><br>FMPS-CM(baseline)/ED (3months)**; F=13.89.<br><br>FMPS-PS(baseline)/ED (3months) (NS)                                                                                                                                                                                                          | 5 <sup>##</sup> |
| (Varela-Besteiro et al., 2017) | A | 109 | C (AN, BN, EDNOS) | 14.74 |     | EDI-II-P<br>CAPS (global score)<br>CAPS-SOP<br>CAPS-SPP | DSM-IV-TR<br>EDI-II-DT<br>EDI-II-BN<br>EDI-II-BD<br>EDI-II-IN<br>EDI-II-ID<br>EDI-II-IA<br>EDI-II-MF<br>EDI-II-ASC | <u>Mann-Whitney U-test:</u> <ul style="list-style-type: none"> <li>- EDI-II-P: Non Suicidal Self Injury (NSSI)&gt;non-NSSI***</li> <li>- CAPS (global score): NSSI&gt;non-NSSI*; F=2.32.</li> <li>- CAPS-SOP: No difference between NSSI and non-NSSI</li> <li>- CAPS-SPP: no difference between NSSI and non-NSSI</li> </ul> | 5 <sup>#</sup>  |

|                        |   |                                                                      |                                                       |                                                                                   |                                                                              |          |                                                                                                      |                                                                                                                                                                                                                                                                                                                                                                                                                               |                |
|------------------------|---|----------------------------------------------------------------------|-------------------------------------------------------|-----------------------------------------------------------------------------------|------------------------------------------------------------------------------|----------|------------------------------------------------------------------------------------------------------|-------------------------------------------------------------------------------------------------------------------------------------------------------------------------------------------------------------------------------------------------------------------------------------------------------------------------------------------------------------------------------------------------------------------------------|----------------|
|                        |   |                                                                      |                                                       |                                                                                   |                                                                              |          | EDI-II-<br>IR<br>EDI-II-<br>INS                                                                      |                                                                                                                                                                                                                                                                                                                                                                                                                               |                |
| (Maiano et al., 2016)* | A | Study 1:291<br>Study 2:900<br>Study 3:51<br>Study 4:92<br>Study 5:38 | COMT for studies 1-4<br>study 5: C (AN with controls) | Study 1:14.32<br>Study 2:13.70<br>Study 3:13.94<br>Study 4:14.59<br>Study 5:15.68 | Study 1:46.4 %<br>Study 2:50%<br>Study 3:49%<br>Study 4:62%<br>Study 5: 100% | EDI-VS-P | EDI-VS-BD<br>EDI-VS-Bu<br>EDI-VS-DT<br>EDI-VS-IN<br>EDI-VS-MF<br>EDI-VS-ID<br>EDI-VS-IA<br>EDI-VS-HO | Study 1:<br>EDI-VS-P/EDI-VS-BD = -0.112<br>EDI-VS-P/EDI-VS-BU = 0.325*<br>EDI-VS-P/EDI-VS-DT = 0.251*<br>EDI-VS-P/EDI-VS-IN = 0.136<br>EDI-VS-P/EDI-VS-MF = 0.115<br>EDI-VS-P/EDI-VS-ID = -0.231*<br>EDI-VS-P/EDI-VS-IA = 0.184<br><br>Study 2:<br>EDI-VS-P/EDI-VS-HO = -0.137*<br>EDI-VS-P/EDI-VS-ID = -0.092<br>EDI-VS-P/EDI-VS-IA = 0.028<br><br>Study 3:<br>NR<br><br>Study 4:<br>EDI-VS-P/EAT-26 = 0.23*<br><br>Study 5: | 3 <sup>#</sup> |

|                                      |   |     |      |             |        |          |                              |                                                                                                                                                                                                                                                                                                               |                 |
|--------------------------------------|---|-----|------|-------------|--------|----------|------------------------------|---------------------------------------------------------------------------------------------------------------------------------------------------------------------------------------------------------------------------------------------------------------------------------------------------------------|-----------------|
|                                      |   |     |      |             |        |          |                              | Contr EDI-VS-P= 3.03<br>(2.20)<br>AN EDI-VS-P= 11.08<br>(5.25)<br>t=6.17***, d=1.99                                                                                                                                                                                                                           |                 |
| (Mockdece<br>Neves et al.,<br>2016)* | A | 413 | COMT | 12.86 (1.8) | 76%    | MPS      | EAT-26<br>SATAQ<br>-3<br>BSQ | <u>Pearson correlations</u><br><u>Controls:</u><br>MPS/EAT-26 = 0.232*<br>MPS/SATAQ-3 = 0.07<br>MPS/BSQ = 0.158<br><br><u>Non-elite athletes:</u><br>MPS/EAT-26 = 0.340*<br>MPS/SATAQ-3 = 0.203*<br>MPS/BSQ = 0.081<br><u>Elite athletes:</u><br>MPS/EAT-26 = 0.182<br>MPS/SATAQ-3 = 0.239<br>MPS/BSQ = 0.294 | 6 <sup>#</sup>  |
| (De Caro & Di<br>Blas, 2016)         | B | 142 | COMT | 15.6        | 46.48% | EDI-II-P | BMI<br>EDI-II                | Partial Correlation<br>BMI(T1) EDI-II-P(T1,<br>T2)<br><br><u>Boys, Girls, All</u><br>- BMI(T1)/EDI-II-<br>P(T2)<br>pr = -0.01 (NS)<br>- EDI-II-BN(T1,T2)<br>EDI-II-P(T1)<br><u>All</u><br>- EDI-II-P(T1)/EDI-II-<br>BN(T2)<br>Sr = 0.18*, R2 = 0.03*<br><br>EDI-2 Perfectionism<br>predicted increases in     | 4 <sup>##</sup> |

|                                                        |   |     |                     |       |        |                                   |               |                                                                                                                                                                                                                                                                                                                                                                                                                                                                                                                                                               |                |
|--------------------------------------------------------|---|-----|---------------------|-------|--------|-----------------------------------|---------------|---------------------------------------------------------------------------------------------------------------------------------------------------------------------------------------------------------------------------------------------------------------------------------------------------------------------------------------------------------------------------------------------------------------------------------------------------------------------------------------------------------------------------------------------------------------|----------------|
|                                                        |   |     |                     |       |        |                                   |               | Bulimia, and changes in the two variables were correlated across time ( $p = .23, p \leq .05$ ).                                                                                                                                                                                                                                                                                                                                                                                                                                                              |                |
| (Flett et al., 2016)*<br><br>(Study 3)<br><br>Sample 4 | A | 131 | COMT                | 15.96 | 54.96% | EDI-P<br>CAPS<br>-SPP<br>-SOP     | EAT-26        | <u>Correlation</u><br><i>Girls</i> <ul style="list-style-type: none"> <li>- CAPS-SOP/EAT-26: <math>r = -0.08</math> (NS)</li> <li>- CAPS-SPP/EAT-26: <math>r = -0.30^*</math></li> <li>- EDI-P/EAT-26: <math>r = 0.19</math> (NS)</li> </ul> <i>Boys</i> <ul style="list-style-type: none"> <li>- CAPS-SOP/EAT-26: <math>r = -0.25</math> (NS)</li> <li>- CAPS-SPP/EAT-26: <math>r = -0.22</math> (NS)</li> <li>- EDI-P/EAT-26 : <math>r = 0.28^*</math></li> </ul>                                                                                           | 4 <sup>#</sup> |
| (Iannaccone et al., 2016)*                             | A | 222 | COMT (obese and HC) | 15.5  | 38.74% | FMPS<br>-COM<br>-PS<br>-PE<br>-DA | EDI-3<br>-EDR | <u>Hierarchical Regression Model</u><br><i>Obese Group</i> <ul style="list-style-type: none"> <li>- EDI-3-EDR/FMPS-COM: <math>\beta = 0.04</math> (NS)</li> <li>- EDI-3-EDR/FMPS-PS: <math>\beta = -0.02</math> (NS)</li> <li>- EDI-3-EDR/FMPS-PE: <math>\beta = 0.05</math> (NS)</li> <li>- EDI-3-EDR/FMPS-DA: <math>\beta = 0.02</math> (NS)</li> </ul> <i>Non-Obese Control Group</i> <ul style="list-style-type: none"> <li>- EDI-3-EDR/FMPS-COM: <math>\beta = -0.19</math> (NS)</li> <li>- EDI-3-EDR/FMPS-PS: <math>\beta = 0.16</math> (NS)</li> </ul> | 3 <sup>#</sup> |

|                          |   |     |        |       |      |                                |                                          |                                                                                                                                                                                                                                                                                                                                                                                                                                                                                                                                                                                                                                                                                                                                                                        |                |
|--------------------------|---|-----|--------|-------|------|--------------------------------|------------------------------------------|------------------------------------------------------------------------------------------------------------------------------------------------------------------------------------------------------------------------------------------------------------------------------------------------------------------------------------------------------------------------------------------------------------------------------------------------------------------------------------------------------------------------------------------------------------------------------------------------------------------------------------------------------------------------------------------------------------------------------------------------------------------------|----------------|
|                          |   |     |        |       |      |                                |                                          | <ul style="list-style-type: none"> <li>- EDI-3-EDR/FMPS-PE: <math>\beta = 0.12</math> (NS)</li> <li>- EDI-3-EDR/FMPS-DA: <math>\beta = 0.07</math> (NS)</li> </ul>                                                                                                                                                                                                                                                                                                                                                                                                                                                                                                                                                                                                     |                |
| (Kerr et al., 2016)      | A | 37  | C (AN) | 14.87 | 100% | CAPS-SOP<br>CAPS-SPP           | DSM IV<br>BMI<br>EDE-Q<br>(global score) | <u>One sample t-test:</u> <ul style="list-style-type: none"> <li>- SOP: AN&gt;HC, <math>t = 10.43^{**}</math></li> <li>- SPP: AN&gt;HC, <math>t = 2.21^*</math></li> </ul>                                                                                                                                                                                                                                                                                                                                                                                                                                                                                                                                                                                             | 2 <sup>#</sup> |
| (Teixeira et al., 2016)* | A | 575 | COMT   | 15.77 | 100% | CAPS<br>-Total<br>-SOP<br>-SPP | CDRS<br>ChEAT<br>BMI                     | <u>Correlation</u> <ul style="list-style-type: none"> <li>- CAPS-Total/BMI = <i>NS</i></li> <li>- CAPS-SOP/BMI = <i>NS</i></li> <li>- CAPS-SPP/BMI = <i>NS</i></li> <li>- CAPS-Total/ChEAT: <math>r = 0.235^{***}</math></li> <li>- CAPS-SOP/ChEAT: <math>r = 0.211^{***}</math></li> <li>- CAPS-SPP/ChEAT: <math>r = 0.175^{***}</math></li> <li>- CAPS-Total/CDRS: <math>r = 0.140^{***}</math></li> <li>- CAPS-SOP/CDRS: <math>r = 0.111^*</math></li> <li>- CAPS-SPP/CDRS: <math>r = 0.123^*</math></li> </ul><br><u>ANOVA</u><br><i>High vs Moderate vs Low Perfectionism</i> <ul style="list-style-type: none"> <li>- CAPS-Total/BMI: <math>F = 0.170</math> (NS)</li> <li>- CAPS-Total/ChEAT: <math>F = 13.232^{***}</math>, High&gt;Moderate&gt;Low</li> </ul> | 2 <sup>#</sup> |

|                         |   |     |      |                          |      |                        |                                                       |                                                                                                                                                                                                                                                                                                                                                                                                                                                                                                      |                |
|-------------------------|---|-----|------|--------------------------|------|------------------------|-------------------------------------------------------|------------------------------------------------------------------------------------------------------------------------------------------------------------------------------------------------------------------------------------------------------------------------------------------------------------------------------------------------------------------------------------------------------------------------------------------------------------------------------------------------------|----------------|
|                         |   |     |      |                          |      |                        |                                                       | <ul style="list-style-type: none"> <li>- CAPS-Total/CDRS: <math>F = 5.086^{**}</math>, High&gt;Low,Moderate</li> <li>- CAPS-SPP/BMI: <i>NR</i></li> <li>- CAPS-SPP/ChEAT: <math>F = 4.812^{*}</math>, Low&lt; Moderate, High</li> <li>- CAPS-SPP/CDRS: <math>F = 3.438^{*}</math>, High&gt; Low, Moderate</li> <li>- CAPS-SOP/BMI: <math>F = 0.174</math> (NS)</li> <li>- CAPS-SOP/ChEAT: <math>F = 8.611^{***}</math>, High&gt;Low</li> <li>- CAPS-SOP/CDRS: <math>F = 1.828</math> (NS)</li> </ul> |                |
| (Turgeon et al., 2015)* | A | 430 | COMT | M:7.6(0.9)<br>G:7.4(0.9) | 71%  | EPPN-PPOS<br>EPPN-PNOS | ChEAT-F                                               | <u>EPPN-PPOS/ChEAT-F:</u><br><i>NR</i><br><u>EPPN-PNOS/ChEAT-F:</u><br>$= 0,33^{***}$                                                                                                                                                                                                                                                                                                                                                                                                                | 4 <sup>#</sup> |
| (Arcelus et al., 2015)* | A | 281 | COMT | 15.28                    | 100% | FMPS-CM<br>FMPS-PS     | BMI<br>BSQ-BD<br>EAT-26-DTG<br>EAT-26-BN<br>EAT-26-OC | <u>Pearson's correlation:</u> <ul style="list-style-type: none"> <li>- FMPS-CM/BSQ-BD: <math>r=0.64^{**}</math></li> <li>- FMPS-CM/EAT-26-DTG: <math>r=0.58^{**}</math></li> <li>- FMPS-CM/EAT-26-BN: <math>r=0.44^{**}</math></li> <li>- FMPS-CM/EAT-26-OC: <math>r=0.22^{**}</math></li> <li>- FMPS-PS/BSQ-BD: <math>r=0.43^{**}</math></li> <li>- FMPS-PS/EAT-26-DTG: <math>r=0.46^{**}</math></li> </ul>                                                                                         | 3 <sup>#</sup> |

|                             |   |      |      |       |        |          |                                              |                                                                                                                                                                                                                                                                                                                                                                                                                                                                                                                                                                               |                |
|-----------------------------|---|------|------|-------|--------|----------|----------------------------------------------|-------------------------------------------------------------------------------------------------------------------------------------------------------------------------------------------------------------------------------------------------------------------------------------------------------------------------------------------------------------------------------------------------------------------------------------------------------------------------------------------------------------------------------------------------------------------------------|----------------|
|                             |   |      |      |       |        |          |                                              | <ul style="list-style-type: none"> <li>- FMPS-PS/EAT-26-BN: <math>r=0.33^{**}</math></li> <li>- FMPS-PS/ EAT-26-OC: <math>r=0.56^{**}</math></li> </ul>                                                                                                                                                                                                                                                                                                                                                                                                                       |                |
| (Francisco et al., 2015)*   | A | 455  | COMT | 13.28 | 51.21% | EDI-II-P | CDRS<br>EAT-26<br>BMI<br>SATAQ<br>-R<br>-ITI | <u>Corrélation</u><br><i>Spain</i> <ul style="list-style-type: none"> <li>- EDI-2-P/BMI: <math>r= 0.05</math> (NS)</li> <li>- EDI-2-P/EAT-26: <math>r= 0.14</math> (NS)</li> <li>- EDI-2-P/CDRS: <math>r= 0.08</math> (NS)</li> <li>- EDI-2-P/SATAQ-ITI: <math>r= 0.09</math> (NS)</li> </ul> <i>Portugal</i> <ul style="list-style-type: none"> <li>- EDI-2-P/BMI: <math>r= 0.03</math> (NS)</li> <li>- EDI-2-P/EAT-26: <math>r= - 0.03</math> (NS)</li> <li>- EDI-2-P/CDRS: <math>r= - 0.07</math> (NS)</li> <li>- EDI-2-P/SATAQ-ITI: <math>r= -0.02</math> (NS)</li> </ul> | 5 <sup>#</sup> |
| (Gutierrez et al., 2015)*   | A | 448  | COMT | 13.4  | 51.79% | EDI-3-P  | EAT-26<br>SATAQ<br>-R<br>CDRS<br>SCOFF       | <u>Multiple Linear Regression Model</u> <ul style="list-style-type: none"> <li>- EDI-3-P/EAT-26: <math>\beta= 0.15^{***}</math></li> <li>- EDI-3-P/SCOFF: <math>\beta= 0.12^{**}</math></li> <li>- EDI-3-P/SATAQ-R: NR</li> <li>- EDI-3-P/CDRS: NR</li> </ul>                                                                                                                                                                                                                                                                                                                 | 4 <sup>#</sup> |
| (Sehm & Warschburger, 2015) | A | 1039 | COMT | 14.37 | 50.3%  | EDI-C-P  | ChEDE-Q<br>-BE                               | <u>multinomial logistic regression analysis</u><br><i>BE vs HC groups</i>                                                                                                                                                                                                                                                                                                                                                                                                                                                                                                     | 6 <sup>#</sup> |

|                       |   |     |              |       |      |                    |                                                                     |                                                                                                                                                                                                                                                                                                          |                 |
|-----------------------|---|-----|--------------|-------|------|--------------------|---------------------------------------------------------------------|----------------------------------------------------------------------------------------------------------------------------------------------------------------------------------------------------------------------------------------------------------------------------------------------------------|-----------------|
|                       |   |     |              |       |      |                    | -RT<br>-WSC<br>SATAQ                                                | - OR = 1.24, [0.92-1.66] 95% CI (NS)                                                                                                                                                                                                                                                                     |                 |
| (Wade & O'Shea, 2015) | B | 699 | COMT (twins) | 12.70 | 100% | FMPS-PS            | EDE                                                                 | <u>ANOVA</u><br><i>No-ED vs AN vs A-AN vs RED</i><br>FMPS-PS(T2): F(607.63) = 11.85***                                                                                                                                                                                                                   | 6 <sup>##</sup> |
| (Wade et al., 2015)*  | B | 926 | COMT         | 13.00 | 100% | FMPS-CM<br>FMPS-PS | EDE-Q-<br>WSC<br>EDE-Q-<br>WSI<br>EDI-<br>-IN<br>-EDR               | <u>Pearson's correlation:</u><br>- FMPS-CM/EDE-Q-WSI (Baseline): r = 0.46***<br>- FMPS-CM/EDI-IN(Baseline): r = 0.49***<br>- FMPS-CM/EDI-EDR(Baseline): r = 0.47***<br>- FMPS-PS/EDE-Q-WSI (Baseline): r = 0.09***<br>- FMPS-PS/EDI-IN(Baseline): r = -0.02<br>- FMPS-PS/EDI-EDR (Baseline): r = 0.08*** | 4 <sup>##</sup> |
| (Formby et al., 2014) | A | 104 | C            | 14.9  | 93%  | EDI-III-P          | EDE<br>global<br>EDI-III-<br>DT<br>EDI-III-<br>BD<br>EDI-III-<br>Bu | <u>EDI-III-P/EDE</u><br>NR<br><u>EDI-III-P/EDI-III-DT</u><br>NR<br><u>EDI-III-P/EDI-III-BD</u><br>NR<br><u>EDI-III-P/EDI-III-Bu</u><br>NR                                                                                                                                                                | 5 <sup>#</sup>  |

|                        |   |     |      |                                  |     |                      |                                                         |                                                                                                                                                                                                                                                                                                                                                                                                                                                                                        |                 |
|------------------------|---|-----|------|----------------------------------|-----|----------------------|---------------------------------------------------------|----------------------------------------------------------------------------------------------------------------------------------------------------------------------------------------------------------------------------------------------------------------------------------------------------------------------------------------------------------------------------------------------------------------------------------------------------------------------------------------|-----------------|
| (Fortes et al., 2014)* | A | 368 | COMT | 13.8(0.83)                       | 0%  | MPS                  | EAT-26-total<br>EAT-26-Diet<br>EAT-26-Bu<br>EAT-26-Oral | <u>Logistic Regression</u><br>Association between high trait perf and high ED symptoms ( $X^2 = 15.87$ , Wald = 15.04, $p = 0.001$ )<br><br><u>Odd Ratio</u><br>Odds of high ED if high perf = 1.92 (95% CI [1.49-5.71])<br><br><u>MANCOVA</u><br><i>High Perf</i><br>Diet = 5.14 (1.11)<br>Low Perf<br>Diet = 4.92 (0.82)<br><br><i>High Perf</i><br>Bu = 5.14 (1.11)<br>Low Perf<br>Bu = 4.92 (0.82)<br><br><i>High Perf</i><br>Oral = 5.14 (1.11)<br>Low Perf<br>Oral = 4.92 (0.82) | 5 <sup>#</sup>  |
| (Goodwin et al., 2014) | B | 369 | COMT | T1:12.89(0.69)<br>T2:14.84(0.67) | 60% | CAPS-SOP<br>CAPS-SPP | EDI-II-DT<br>EDI-II-BD<br>EDI-II-Bu                     | <u>CAPS-SOP/EDI-II-DT</u> = NR<br><u>CAPS-SOP/EDI-II-BD</u> = NR<br><u>CAPS-SOP/EDI-II-Bu</u> = NR<br><br><u>CAPS-SPP/EDI-II-DT</u> = NR<br><u>CAPS-SPP/EDI-II-BD</u> = NR                                                                                                                                                                                                                                                                                                             | 4 <sup>##</sup> |

|                                 |   |     |      |       |     |                    |                                                         |                                                                                                                                                                                                                                                                                                                                                             |                 |
|---------------------------------|---|-----|------|-------|-----|--------------------|---------------------------------------------------------|-------------------------------------------------------------------------------------------------------------------------------------------------------------------------------------------------------------------------------------------------------------------------------------------------------------------------------------------------------------|-----------------|
|                                 |   |     |      |       |     |                    |                                                         | <u>CAPS-SPP/EDI-II-Bu =<br/>NR</u>                                                                                                                                                                                                                                                                                                                          |                 |
| (Boone, Claes, et al., 2014)*   | A | 460 | COMT | 14.20 | 70% | FMPS-PS<br>FMPS-EC | EDE-Q-WC<br>EDE-Q-SC<br>EDE-Q-RT<br>EDE-Q-EAC           | <u>Pearson's correlation:</u><br>- FMPS -PS/ EDE-Q-RT: $r=0.17^{***}$<br>- FMPS -PS/ EDE-Q-EAC: $r=0.19^{***}$<br>- FMPS -PS/ EDE-Q-WC: $r=0.15^{**}$<br>- FMPS-PS /EDE-Q-SC: $r=0.14^{**}$<br>- FMPS -EC/ EDE-Q-RT: $r=0.28^{***}$<br>- FMPS -EC/ EDE-Q-EAC: $r=0.34^{***}$<br>- FMPS EC/ EDE-Q-WC: $r=0.28^{***}$<br>- FMPS -EC/ EDE-Q-SC: $r=0.29^{***}$ | 3 <sup>#</sup>  |
| (Boone, Soenens, et al., 2014)* | B | 455 | COMT | 13.25 | 70% | FMPS-PS<br>FMPS-EC | BMI<br>EDE-Q-WSC<br>EDI-II-DT<br>EDI-II-BD<br>EDI-II-BN | <u>Pearson's correlation:</u><br>- FMPS-PS/EDE-Q-WSC (Baseline): $r = .29^{***}$<br>- FMPS-PS/EDI-II-DT (Baseline): $r = .18^{***}$<br>- FMPS-PS/EDI-II-BD (Baseline): $r = .09^*$<br>- FMPS-PS/EDI-II-BN (Baseline): $r = .11^*$<br>- FMPS-EC/EDE-Q-WSC (Baseline): $r = .45^{***}$<br>- FMPS-EC/EDI-II-DT (Baseline): $r = .39^{***}$                     | 5 <sup>##</sup> |

|                                        |   |     |                                                |                    |        |                                        |                  |                                                                                                                                                                                                                                                                                                                                                     |                 |
|----------------------------------------|---|-----|------------------------------------------------|--------------------|--------|----------------------------------------|------------------|-----------------------------------------------------------------------------------------------------------------------------------------------------------------------------------------------------------------------------------------------------------------------------------------------------------------------------------------------------|-----------------|
|                                        |   |     |                                                |                    |        |                                        |                  | <ul style="list-style-type: none"> <li>- FMPS-EC/EDI-II-BD (Baseline): <math>r = .40^{***}</math></li> <li>- FMPS-EC/EDI-II-BN (Baseline): <math>r = .45^{***}</math></li> </ul>                                                                                                                                                                    |                 |
| (Boone, Vansteenkiste, et al., 2014) * | B | 566 | COMT                                           | 13.30              | 72%    | FMPS-EC                                | BMI<br>EDI-II-BN | <u>Pearson correlation:</u> <ul style="list-style-type: none"> <li>- FMPS-EC/EDI-II-BN (Baseline): <math>r = 0.39^{***}</math></li> <li>- FMPS-EC/BMI (Baseline): <math>r = -0.03</math> (NS)</li> <li>- FMPS-EC/EDI-II-BN (6 months): <math>r = 0.37^{***}</math></li> <li>- FMPS-EC/EDI-II-BN (12 months): <math>r = 0.31^{***}</math></li> </ul> | 4 <sup>##</sup> |
| (Fairweather-Schmidt & Wade, 2014)     | B | 699 | COMT (twins)                                   | 12.70              | 100%   | FMPS-COM                               | EDE              | <u>ANOVA</u><br><i>No-ED (T2-T3) vs ED (T2-T3) vs OSFED (T2-T3)</i><br>FMPS-COM(T1):<br>$F(650,44) = 1.12$ (NS)                                                                                                                                                                                                                                     | 4 <sup>##</sup> |
| (Lyman & Luthar, 2014)*                | A | 299 | COMT (Academically gifted) High SES vs Low SES | 11th--12th graders | 56.87% | PSS<br>-Non-Display<br>-Non-Disclosure | EDI-BD           | <u>Correlation</u><br><i>High SES</i> <ul style="list-style-type: none"> <li>- PSS-Non-Display/EDI-BD: <math>r = 0.16</math> (NS)</li> <li>- PSS-Non-Disclosure/EDI-BD: <math>r = 0.17</math> (NS)</li> </ul> <i>Low SES</i> <ul style="list-style-type: none"> <li>- PSS-Non-Display/EDI-BD: <math>r = 0.24^*</math></li> </ul>                    | 4 <sup>#</sup>  |

|                            |   |     |                   |                                                            |       |                                                                                                    |                                            |                                                                                                                                                                                                                                                                                                                                                                                                                 |                |
|----------------------------|---|-----|-------------------|------------------------------------------------------------|-------|----------------------------------------------------------------------------------------------------|--------------------------------------------|-----------------------------------------------------------------------------------------------------------------------------------------------------------------------------------------------------------------------------------------------------------------------------------------------------------------------------------------------------------------------------------------------------------------|----------------|
|                            |   |     |                   |                                                            |       |                                                                                                    |                                            | - PSS-Non-Disclosure/EDI-BD<br>- $r = 0.30^{**}$                                                                                                                                                                                                                                                                                                                                                                |                |
| (Upadhyah et al., 2014)    | A | 120 | COMT              | Group I: $15.05 \pm 0.86$<br><br>Group 2: $14.70 \pm 0.56$ | 100%  | Not validated Semi-structured questionnaire of factors associated with ED - perfectionism subscale | EAT-26                                     | <u>Group I (EAT Score <math>\geq 20</math>) (n = 32)</u><br>mean (sd): $3.97 \pm 0.86$ ; score 79.4<br><br><u>Group II (EAT Score <math>&lt; 20</math>) (n=88)</u><br>mean (sd): $1.95 \pm 0.95$ 39.1                                                                                                                                                                                                           | 3 <sup>#</sup> |
| (Pellicciari et al., 2012) | A | 78  | C (AN, BN, EDNOS) | 15.40                                                      | 100%  | SAFA P<br>EDI-2 P                                                                                  | SAFA P<br>EDI-2                            | <u>EDI-II-P/SAFA=</u><br>NR                                                                                                                                                                                                                                                                                                                                                                                     | 4 <sup>#</sup> |
| (Boone et al., 2012)*      | A | 275 | COMT              | 16.51                                                      | 50.2% | FMPS-PS<br>FMPS-CM                                                                                 | BMI<br>EDI-II-BN<br>EDI-II-BD<br>EDI-II-DT | <u>Pearson correlation:</u><br><i>Perfectionism trait</i><br>- FMPS-PS/EDI-II-BN: $r=0.09$ (NS)<br>- FMPS-PS/EDI-II-BD: $r=0.12$ (NS)<br>- FMPS-PS/EDI-II-DT: $r=0.19^*$<br>- FMPS-PS/BMI: $r=0.01$ (NS)<br>- FMPS-CM/EDI-II-BN: $r=0.20^{***}$<br>- FMPS-CM/EDI-II-BD: $r=0.23^{***}$<br>- FMPS-CM/EDI-II-DT: $r=0.23^{***}$<br>- FMPS-CM/BMI: $r = -0.09$ (NS)<br><br><i>Perfectionism daily fluctuations</i> | 4 <sup>#</sup> |

|                         |   |          |               |              |              |          |                           |                                                                                                                                                                                                                                                                                                                                                                                                                                                                              |                 |
|-------------------------|---|----------|---------------|--------------|--------------|----------|---------------------------|------------------------------------------------------------------------------------------------------------------------------------------------------------------------------------------------------------------------------------------------------------------------------------------------------------------------------------------------------------------------------------------------------------------------------------------------------------------------------|-----------------|
|                         |   |          |               |              |              |          |                           | <ul style="list-style-type: none"> <li>- FMPS-PS/EDI-II-BN: <math>r=0.12^*</math></li> <li>- FMPS-PS/EDI-II-BD: <math>r=0.01</math> (NS)</li> <li>- FMPS-PS/EDI-II-DT: <math>r=0.06</math></li> <li>- FMPS-PS/BMI: <math>r=-0.07</math> (NS)</li> <li>- FMPS-CM/EDI-II-BN: <math>r=0.27^{***}</math></li> <li>- FMPS-CM/EDI-II-BD: <math>r=0.25^{***}</math></li> <li>- FMPS-CM/EDI-II-DT: <math>r=0.23^{***}</math></li> <li>- FMPS-CM/BMI: <math>r=-0.05</math></li> </ul> |                 |
| (Buhren et al., 2012)*  | B | 28<br>27 | C(AN)<br>COMT | 15.6<br>15.0 | 100%<br>100% | EDI-II-P | SIAB-EX                   | <u>T-Test</u><br><i>AN vs HC</i> <ul style="list-style-type: none"> <li>- EDI-II-P (T0) : <math>18.0(5.9) = 14.3(3.8)</math> (NS) <math>p = 0.059</math></li> </ul>                                                                                                                                                                                                                                                                                                          | 6 <sup>##</sup> |
| (Ferreiro et al., 2012) | B | 942      | COMT          | 10.8         | 49%          | EDI-II-P | BMI<br>ChEAT<br>EDI-II-BD | <u>Correlation</u><br><i>Girls</i> <ul style="list-style-type: none"> <li>- EDI-II-P(T1)/ChEAT(T3): <math>r = 0.24^*</math></li> <li>- EDI-II-P(T2)/ChEAT(T3): <math>r = 0.10^*</math></li> </ul> <i>Boys</i> <ul style="list-style-type: none"> <li>- EDI-II-P(T1)/ChEAT(T3): <math>r = 0.17^*</math></li> <li>- EDI-II-P(T2)/ChEAT(T3): <math>r = 0.24^*</math></li> </ul>                                                                                                 | 6 <sup>##</sup> |

|                                |   |     |      |      |      |      |                      |                                                                                                                                                                                                                                                                                                                                                                                                                         |                 |
|--------------------------------|---|-----|------|------|------|------|----------------------|-------------------------------------------------------------------------------------------------------------------------------------------------------------------------------------------------------------------------------------------------------------------------------------------------------------------------------------------------------------------------------------------------------------------------|-----------------|
|                                |   |     |      |      |      |      |                      | <u>hierarchical multiple regression analyses</u><br>- EDI-II-P(T1) predictors of ChEAT(T3)<br>- <i>Girls</i> $\beta = 0.14^{**}$<br>- <i>Boys</i> (NS)<br><br>EDI-II-P(T2) predictors of ChEAT(T3)<br>- <i>Girls</i> (NS)<br>- <i>Boys</i> (NS)                                                                                                                                                                         |                 |
| (Wojtowicz & von Ranson, 2012) | B | 393 | COMT | 15.8 | 100% | CAPS | BMI<br>TREI<br>SDBPS | <u>Correlation</u><br>- CAPS(T1)/BMI(T1): $r = 0.07$ (NS)<br>- CAPS(T1)/TREI(T1): $r = 0.23^{**}$<br>- CAPS(T1)/SDBPS(T1): $r = 0.19^{**}$<br>- CAPS(T1)/SDBPS(T2): $r = 0.15^{**}$<br><br><u>T-test</u><br><i>Baseline BD vs Baseline No-BD</i><br><br>CAPS<br>BD>No-BD: $t = 2.24^*$ , $d = 0.34$<br><br><u>hierarchical regression models</u><br>CAPS/Increase in BD from T1 to T2: $\beta = 0.033$ (NS), $r = 0.03$ | 5 <sup>##</sup> |

|                              |   |      |                    |       |        |                      |                                                               |                                                                                                                                                                                                                                                                                                                                         |                 |
|------------------------------|---|------|--------------------|-------|--------|----------------------|---------------------------------------------------------------|-----------------------------------------------------------------------------------------------------------------------------------------------------------------------------------------------------------------------------------------------------------------------------------------------------------------------------------------|-----------------|
| (Turgeon et al., 2011)*      | A | 43   | COMT<br>(chEAT>20) | 9.37  | 65%    | EPPN                 | ChEAT                                                         | <u>Correlation</u><br>EPPN/ChEAT = 0.004                                                                                                                                                                                                                                                                                                | 3 <sup>#</sup>  |
| (Boone et al., 2011)*        | B | 559  | COMT               | 13.9  | 59%    | FMPS-PS<br>FMPS-EC   | BMI<br>PSPS-<br>PPBT<br>ITI<br>EDI-II-<br>BN<br>EDI-II-<br>BD | <u>Pearson correlation:</u><br>- FMPS-PS/BMI<br>(Baseline): $r=0.02$<br>(NS)<br>- FMPS-PS/EDI-II-BN<br>(Baseline): $r=0.11^*$<br>- FMPS-PS/EDI-II-BD<br>(Baseline): $r=0.00$<br>(NS)<br>- FMPS-EC/BMI<br>(Baseline): $r=0.12^*$<br>- FMPS-EC/EDI-II-BN<br>(Baseline): $r=0.29^{**}$<br>- FMPS-EC/EDI-II-BD<br>(Baseline): $r=0.19^{**}$ | 6 <sup>##</sup> |
| (Dour & Theran, 2011)*       | A | 161  | COMT               | 12.8  | 54%    | APS-R<br>-D          | EAT-26                                                        | <u>Correlation</u><br>APS-R-D/EAT-26<br>$r=0.30^{**}$                                                                                                                                                                                                                                                                                   | 3 <sup>#</sup>  |
| (Goodwin et al., 2011)       | A | 1488 | COMT               | 12.98 | 54.1%  | CAPS-SOP<br>CAPS-SPP | BMI<br>EDI-II-<br>DT<br>EDI-II-<br>BN<br>EDI-II-<br>BD        | <u>Multiple stepwise<br/>regression:</u><br><i>Boys</i><br>- CAPS-SOP predicts<br>Compulsive exercise<br>test (CET): $\beta = 0.27$ ,<br>$T=6.64^{***}$<br><br><i>Girls</i><br>- CAPS-SOP predicts<br>CET: $\beta = 0.31$ , $T =$<br>$8.77^{***}$                                                                                       | 3 <sup>#</sup>  |
| (Nordin-Bates et al., 2011)* | A | 347  | COMT<br>(Dancers)  | 14.43 | 75.43% | PI<br>-CP            | EAT-26                                                        | <u>Correlation</u><br><i>Girls</i>                                                                                                                                                                                                                                                                                                      | 3 <sup>#</sup>  |

|                       |   |      |      |                |       |                                |                               |                                                                                                                                                                                                                                                                                                                                                                             |                 |
|-----------------------|---|------|------|----------------|-------|--------------------------------|-------------------------------|-----------------------------------------------------------------------------------------------------------------------------------------------------------------------------------------------------------------------------------------------------------------------------------------------------------------------------------------------------------------------------|-----------------|
|                       |   |      |      |                |       | -SEP                           |                               | <ul style="list-style-type: none"> <li>- PI-CP/EAT-26: <math>r=0.27^{**}</math></li> <li>- PI-SEP/EAT-26: <math>r=0.42^{**}</math></li> </ul> <p><i>Boys</i></p> <ul style="list-style-type: none"> <li>- PI-CP/EAT-26: <math>r=0.24^*</math></li> <li>- PI-SEP/EAT-26: <math>r=0.31^*</math></li> </ul>                                                                    |                 |
| (Fan et al., 2010)    | A | 3544 | COMT | 15.6 $\pm$ 0.7 | 60%   | EDI-3: Perf                    | EDI-3:<br>DT BD<br>Bu         | <u>NR (focus on BMI)</u>                                                                                                                                                                                                                                                                                                                                                    | 7 <sup>#</sup>  |
| (Bachar et al., 2010) | B | 1057 | COMT | 14.02          | 100%  | HMPS                           | EAT-26<br>EDFHI               | <u>T-test</u><br>ED vs Non-ED<br><br><i>Seventh Grade group</i><br>HMPS: $t = -0.59$ (NS)<br><br><i>Ninth Grade group</i><br>HMPS: $t = 0.56$ (NS)                                                                                                                                                                                                                          | 5 <sup>##</sup> |
| (Bento et al., 2010)  | A | 997  | COMT | 16.88          | 55.8% | CAPS<br>-Total<br>-SOP<br>-SPP | EAT-25<br>-DT<br>-BRB<br>-SPE | <u>One-Way ANOVA</u><br>Low vs Medium vs High<br>Perf<br><br><u>Girls</u> <ul style="list-style-type: none"> <li>- CAPS-Total/EAT-25-Total: <math>F(551) = 30.107^{***}</math>,<br/>High&gt;Medium&gt;Low</li> <li>- CAPS-Total/EAT-25-DT: <math>F(551) = 28.385^{***}</math>,<br/>High&gt;Medium&gt;Low</li> <li>- CAPS-Total/EAT-25-BRB: <math>F(551) =</math></li> </ul> | 4 <sup>#</sup>  |

|  |  |  |  |  |  |  |  |                                                                                                                                                                                                                                                                                                                                                                                                                                                                                                                                                                                                                                                                                                                                                     |  |
|--|--|--|--|--|--|--|--|-----------------------------------------------------------------------------------------------------------------------------------------------------------------------------------------------------------------------------------------------------------------------------------------------------------------------------------------------------------------------------------------------------------------------------------------------------------------------------------------------------------------------------------------------------------------------------------------------------------------------------------------------------------------------------------------------------------------------------------------------------|--|
|  |  |  |  |  |  |  |  | <p>26.593***,<br/>High&gt;Medium, Low</p> <ul style="list-style-type: none"> <li>- CAPS-Total/EAT-25-SPE: F(551) = 2.477 (NS)</li> <li>- CAPS-SPP/EAT-25-Total: F(552) = 21.728***,<br/>High&gt;Medium&gt;Low</li> <li>- CAPS-SPP/EAT-25-DT: F(552) = 17.992***,<br/>High&gt;Medium&gt;Low</li> <li>- CAPS-SPP/EAT-25-BRB: F(552) = 17.992***,<br/>High&gt;Medium, Low</li> <li>- CAPS-SPP/EAT-25-SPE: F(552) = 1.176(NS)</li> <li>- CAPS-SOP/EAT-25-Total: F(551) = 16.806***,<br/>High&gt;Medium&gt;Low</li> <li>- CAPS-SOP/EAT-25-DT: F(551) = 14.612***,<br/>High&gt;Medium,Low</li> <li>- CAPS-SOP/EAT-25-BRB: F(551) = 17.671***,<br/>High&gt;Medium&gt; Low</li> <li>- CAPS-SOP/EAT-25-SPE: F(551) = 3.158(NS)</li> </ul> <p><u>Boys</u></p> |  |
|--|--|--|--|--|--|--|--|-----------------------------------------------------------------------------------------------------------------------------------------------------------------------------------------------------------------------------------------------------------------------------------------------------------------------------------------------------------------------------------------------------------------------------------------------------------------------------------------------------------------------------------------------------------------------------------------------------------------------------------------------------------------------------------------------------------------------------------------------------|--|

|  |  |  |  |  |  |  |  |                                                                                                                                                                                                                                                                                                                                                                                                                                                                                                                                                                                                                                                                                                                                                                                                                    |  |
|--|--|--|--|--|--|--|--|--------------------------------------------------------------------------------------------------------------------------------------------------------------------------------------------------------------------------------------------------------------------------------------------------------------------------------------------------------------------------------------------------------------------------------------------------------------------------------------------------------------------------------------------------------------------------------------------------------------------------------------------------------------------------------------------------------------------------------------------------------------------------------------------------------------------|--|
|  |  |  |  |  |  |  |  | <ul style="list-style-type: none"> <li>- CAPS-Total/EAT-25-<br/>Total: F(430) =<br/>6.73**,<br/>High&gt;Medium, Low</li> <li>- CAPS-Total/EAT-25-<br/>DT: F(430) =<br/>7.074**,<br/>High&gt;Medium, Low</li> <li>- CAPS-Total/EAT-25-<br/>BRB: F(430) = 0.108<br/>(NS)</li> <li>- CAPS-Total/EAT-25-<br/>SPE: F(430) = 2.089<br/>(NS)</li> <li>- CAPS-SPP/EAT-25-<br/>Total: F(431) =<br/>11.856**,<br/>High&gt;Medium, Low</li> <li>- CAPS-SPP/EAT-25-<br/>DT: F(431) =<br/>12.298***,<br/>High&gt;Medium, Low</li> <li>- CAPS-SPP/EAT-25-<br/>BRB: F(431) = 2.541<br/>(NS)</li> <li>- CAPS-SPP/EAT-25-<br/>SPE: F(431) = 1.997<br/>(NS)</li> <li>- CAPS-SOP/EAT-25-<br/>Total: F(430) =<br/>8.768***,<br/>High&gt;Medium</li> <li>- CAPS-SOP/EAT-25-<br/>DT: F(430) =<br/>7.232**,<br/>High&gt;Medium</li> </ul> |  |
|--|--|--|--|--|--|--|--|--------------------------------------------------------------------------------------------------------------------------------------------------------------------------------------------------------------------------------------------------------------------------------------------------------------------------------------------------------------------------------------------------------------------------------------------------------------------------------------------------------------------------------------------------------------------------------------------------------------------------------------------------------------------------------------------------------------------------------------------------------------------------------------------------------------------|--|

|                      |   |     |      |      |       |                    |                                                      |                                                                                                                                                                                                                                                                                                                                                                                                                                                                                                                                                                                                                                                                                                                                                                                                                                                                                                                                                                |                |
|----------------------|---|-----|------|------|-------|--------------------|------------------------------------------------------|----------------------------------------------------------------------------------------------------------------------------------------------------------------------------------------------------------------------------------------------------------------------------------------------------------------------------------------------------------------------------------------------------------------------------------------------------------------------------------------------------------------------------------------------------------------------------------------------------------------------------------------------------------------------------------------------------------------------------------------------------------------------------------------------------------------------------------------------------------------------------------------------------------------------------------------------------------------|----------------|
|                      |   |     |      |      |       |                    |                                                      | <ul style="list-style-type: none"> <li>- CAPS-SOP/EAT-25-BRB: <math>F(430) = 3.94</math> (NS)</li> <li>- CAPS-SOP/EAT-25-SPE: <math>F(430) = 3.426</math> (NS)</li> </ul>                                                                                                                                                                                                                                                                                                                                                                                                                                                                                                                                                                                                                                                                                                                                                                                      |                |
| (Boone et al., 2010) | A | 656 | COMT | 13.9 | 58.5% | FMPS-PS<br>FMPS-EC | BMI<br>EDE-Q-RT<br>EDE-Q-WC<br>EDE-Q-SC<br>EDE-Q-EAC | <u>Pearson correlation:</u> <ul style="list-style-type: none"> <li>- FMPS-PS/EDE-Q-RT: <math>r=0.22^{***}</math></li> <li>- FMPS-PS/EDE-Q-WC: <math>r=0.15^{***}</math></li> <li>- FMPS-PS/EDE-Q-SC: <math>r=0.16^{***}</math></li> <li>- FMPS-PS/EDE-Q-EAC: <math>r=0.25^{***}</math></li> <li>- FMPS-EC/EDE-Q-RT: <math>r=0.37^{***}</math></li> <li>- FMPS-EC/EDE-Q-WC: <math>r=0.33^{***}</math></li> <li>- FMPS-EC/EDE-Q-SC: <math>r=0.34^{***}</math></li> <li>- FMPS-EC/EDE-Q-EAC: <math>r=0.44^{***}</math></li> </ul> <u>Multiple regressions</u> <ul style="list-style-type: none"> <li>- FMPS-PS/EDE-Q-RT: <math>\beta = 0.01</math></li> <li>- FMPS-PS/EDE-Q-EAC: <math>\beta = -0.02</math></li> <li>- FMPS-PS/EDE-Q-WC: <math>\beta = -0.04</math></li> <li>- FMPS-PS/EDE-Q-SC: <math>\beta = -0.04</math></li> <li>- FMPS-EC/EDE-Q-RT: <math>\beta = 0.35^{***}</math></li> <li>- FMPS-EC/EDE-Q-EAC: <math>\beta = 0.45^{***}</math></li> </ul> | 4 <sup>#</sup> |

|                         |   |     |               |       |        |                                             |                                                              |                                                                                                                                                                                                                                                                                                                                                                                                                                                                                                                                                                                                                                                                                       |                |
|-------------------------|---|-----|---------------|-------|--------|---------------------------------------------|--------------------------------------------------------------|---------------------------------------------------------------------------------------------------------------------------------------------------------------------------------------------------------------------------------------------------------------------------------------------------------------------------------------------------------------------------------------------------------------------------------------------------------------------------------------------------------------------------------------------------------------------------------------------------------------------------------------------------------------------------------------|----------------|
|                         |   |     |               |       |        |                                             |                                                              | <ul style="list-style-type: none"> <li>- FMPS-EC/EDE-Q-WC: <math>\beta = 0.35^{***}</math></li> <li>- FMPS-EC/EDE-Q-SC: <math>\beta = 0.37^{***}</math></li> </ul>                                                                                                                                                                                                                                                                                                                                                                                                                                                                                                                    |                |
| (Chen et al., 2010)*    | A | 883 | COMT          | NR    | 48.81% | EDI-P                                       | BMI<br>CDRS<br>MBSRQ<br>-AE<br>SATAQ<br>-AWA<br>SATAQ<br>-GI | <u>Pearson correlation:</u><br><i>Boys</i> <ul style="list-style-type: none"> <li>- EDI-P/BMI: <math>r = 0.09</math> (NS)</li> <li>- EDI-P/CDRS: <math>r = 0.03</math> (NS)</li> <li>- EDI-P/MBSRQ-AE: <math>r = 0.07</math> (NS)</li> <li>- EDI-P/SATAQ-AWA: <math>r = 0.14^{**}</math></li> <li>- EDI-P/SATAQ-ITI: <math>r = 0.12^*</math></li> </ul> <i>Girls</i> <ul style="list-style-type: none"> <li>- EDI-P/BMI: <math>r = -0.03</math> (NS)</li> <li>- EDI-P/CDRS: <math>r = 0.02</math> (NS)</li> <li>- EDI-P/MBSRQ-AE: <math>r = 0.08</math> (NS)</li> <li>- EDI-P/SATAQ-AWA: <math>r = 0.25^{**}</math></li> <li>- EDI-P/SATAQ-ITI: <math>r = 0.21^{**}</math></li> </ul> | 5 <sup>#</sup> |
| (Phillips et al., 2010) | A | 32  | C (AN, EDNOS) | 15.72 | 100%   | CAPS (global score)<br>CAPS-SPP<br>CAPS-SOP | DSM IV<br>85% of<br>IBW                                      | <u>Cox Regression</u> <ul style="list-style-type: none"> <li>- CAPS (global score) /85% of IBW: Odd Ratio = 0.63*</li> <li>- CAPS-SPP/85% of IBW: Odd Ratio = 0.84 (NS)</li> </ul>                                                                                                                                                                                                                                                                                                                                                                                                                                                                                                    | 5 <sup>#</sup> |

|                           |   |                                |                            |                                                  |                  |          |                                                                  |                                                                                                                                                                                                                                       |                 |
|---------------------------|---|--------------------------------|----------------------------|--------------------------------------------------|------------------|----------|------------------------------------------------------------------|---------------------------------------------------------------------------------------------------------------------------------------------------------------------------------------------------------------------------------------|-----------------|
|                           |   |                                |                            |                                                  |                  |          |                                                                  | - CAPS-SOP/85% of IBW: Odd Ratio =0.72 (NS)                                                                                                                                                                                           |                 |
| (Westerberg et al., 2010) | B | 516                            | COMT                       | NR                                               | 100%             | EDI-C-P  | BMI<br>ChEAT (global score)<br>ChEAT-DTG<br>ChEAT-BN<br>ChEAT-OC | <u>Pearson correlation:</u><br>- EDI-C-P(baseline)/ChEAT (global score, Year 8): $r = 0.19^*$<br><br><u>Multiple regression</u><br>- EDI-C-P(baseline)/ChEAT (global score, Year 8): $\beta = 0.15$ (NS)                              | 4 <sup>##</sup> |
| (Wilksch & Wade, 2010)    | B | 699                            | COMT (twins)               | 13.96                                            | 100%             | FMPS-COM | EDE-WSC                                                          | <u>Correlation</u><br>- FMPS-COM(T1)/EDE-WSC(T1): $r = 0.279^{**}$<br><br><u>Multivariate analysis</u><br><u>Univariate Predictors</u><br><i>Controlled for EDE-WSC(T1)</i><br>EDE-WSC(T2)/FMPS-COM(T1)<br>REML = .06 [.05, .16] (NS) | 6 <sup>##</sup> |
| (Canals et al., 2009)     | B | T1:258<br>T2:200 (113 at risk) | COMT (at risk or controls) | T1: NR<br>T2: boys M = 13.78 and girls M = 13.79 | T1:52%<br>T2:54% | EDI-2    | chEAT                                                            | <u>NR: only cross-generational findings (mother BD vis-a-vis daughter BD for example)</u>                                                                                                                                             | 8 <sup>##</sup> |

|                                  |   |     |      |      |       |                     |                          |                                                                                                                                                                                                                                                                                                                                                                                                                                          |                 |
|----------------------------------|---|-----|------|------|-------|---------------------|--------------------------|------------------------------------------------------------------------------------------------------------------------------------------------------------------------------------------------------------------------------------------------------------------------------------------------------------------------------------------------------------------------------------------------------------------------------------------|-----------------|
| (Custers & Van den Bulck, 2009)* | A | 711 | COMT | 13.7 | 54.9% | EDI-P               | BMI<br>EDI-DT<br>SDQ-PAA | <u>Pearson correlation:</u> <ul style="list-style-type: none"> <li>- EDI-P/visiting pro-ana sites: <math>r=0.194^{***}</math></li> <li>- EDI-P/EDI-DT: <math>r=0.260^{***}</math></li> <li>- EDI-P/BMI: <math>r=0.098</math> (NS)</li> <li>- EDI-P/SDQ-PAA: <math>r=-0.084</math> (NS)</li> </ul>                                                                                                                                        | 4 <sup>#</sup>  |
| (Gustafsson et al., 2009)        | B | 429 | COMT | 13.6 | 100%  | EDI-C-PS            | ChEAT (Swedish)          | <u>ANOVA</u><br>Disturbed Eating vs Intermediate Eating<br>Concern vs Healthy Eating Attitudes<br><br>EDI-C-PS<br>$F = 2.7$ (NS)                                                                                                                                                                                                                                                                                                         | 4 <sup>##</sup> |
| (Gustafsson et al., 2008)*       | B | 205 | COMT | 16.8 | 100%  | EDI-C-SOP (3 items) | ChEAT (Swedish)          | <u>3 groups:</u> <ul style="list-style-type: none"> <li>- DE :</li> <li>- PS : psychosocial problems reported by parents</li> <li>- SF : healthy eating attitudes/behaviour and no reported psychosocial problems</li> </ul><br>Item 1 “I hate being less than best at things”: SF ( $M = 0.3$ (0.66)) = PS ( $M = 0.3$ (0.80)) < DE ( $M = 0.9$ (1.14)) avec $F$ (df2) = 10.9 et $p < .001$ .<br><br>Item 2 “I feel I must be the best, | 4 <sup>##</sup> |

|                        |   |     |      |       |      |                  |                     |                                                                                                                                                                                                                                                                                                                                                                                                                                           |                 |
|------------------------|---|-----|------|-------|------|------------------|---------------------|-------------------------------------------------------------------------------------------------------------------------------------------------------------------------------------------------------------------------------------------------------------------------------------------------------------------------------------------------------------------------------------------------------------------------------------------|-----------------|
|                        |   |     |      |       |      |                  |                     | <p>or not do anything at all”: SF (M = 0.1 (0.37)) = PS (M = 0.2 (0.62)) &lt; DE (M= 0.6 (0.95)), avec F(df=2) = 11.3 et p=0.001.</p> <p>Item 3 “I want to do very well at things: PS (M = 1.1 (1.05)) &lt; DE (M = 1.8 (1.14)), avec F = 6.5 et p = 0.002.</p> <p>EDI-C-SOP/ ChEAT: NR</p>                                                                                                                                               |                 |
| (Wilksch et al., 2008) | B | 138 | COMT | 15.00 | 100% | MPS-CM<br>MPS-PS | DEBQ-RT<br>EDEQ-WSC | <p><u>Mixed-Model Analyses of Dependent Variables (Time 1 Covariate) by Time (2), Risk Status (2), and Group (3):</u></p> <ul style="list-style-type: none"> <li>- EDEQ- WSC (postprogramm): High risk in perfectionism (n= 15, M=2.22(0.32)) et Low risk in perfectionism (n=26, M=2.78 (0.21)).</li> <li>- MPS-CM/ DEBQ-RT: NR</li> <li>- MPS-PS/DEBQ-RT: NR</li> <li>- MPS-CM/ EDEQ-WSC: NR</li> <li>- MPS-PS/ EDEQ-WSC: NR</li> </ul> | 5 <sup>##</sup> |

|                           |   |     |        |       |      |                    |                                                                  |                                                                                                                                                                                                                                                                                                                                                                                                                                                                                                     |                 |
|---------------------------|---|-----|--------|-------|------|--------------------|------------------------------------------------------------------|-----------------------------------------------------------------------------------------------------------------------------------------------------------------------------------------------------------------------------------------------------------------------------------------------------------------------------------------------------------------------------------------------------------------------------------------------------------------------------------------------------|-----------------|
| (Westerberg et al., 2008) | B | 567 | COMT   | NR    | 100% | EDI-C-P            | BMI<br>ChEAT (global score)<br>ChEAT-DTG<br>ChEAT-BN<br>ChEAT-OC | <u>Pearson correlation:</u><br>- EDI-C-P(baseline)/ChEAT (global score, Year 3): $r=0.26^{***}$<br><br><u>Multiple regression</u><br>- EDI-C-P(baseline)/ChEAT (global score, Year 3): $\beta = 0.11$ (NS)                                                                                                                                                                                                                                                                                          | 5 <sup>##</sup> |
| (Nilsson et al., 2008)    | B | 68  | C (AN) | 15.00 | 100% | EDI-SOP<br>EDI-SPP | DSM III<br>DSM IV<br>EDI (global score)                          | <u>Kruskal–Wallis test (post hoc Mann–Whitney U Test)</u><br>- EDI-P (8 years later): Long term recovered < almost long term recovered, newly recovered, not recovered***<br>- EDI-P (16 years later): Long term recovered < almost long term recovered, newly recovered, not recovered***<br>- EDI-SOP (8 years later): Long term recovered < not recovered***<br>- EDI-SOP (16 years later): No group difference, $p=0.045$<br>- EDI-SPP (8 years later): Long term recovered < newly recovered** | 4 <sup>##</sup> |

|                                  |   |     |                    |       |      |                      |                                                    |                                                                                                                                                                                                                                                                                                                  |                |
|----------------------------------|---|-----|--------------------|-------|------|----------------------|----------------------------------------------------|------------------------------------------------------------------------------------------------------------------------------------------------------------------------------------------------------------------------------------------------------------------------------------------------------------------|----------------|
|                                  |   |     |                    |       |      |                      |                                                    | - EDI-SPP (16 years later): Long term recovered < newly recovered***                                                                                                                                                                                                                                             |                |
| (Castro-Fornieles et al., 2007)* | A | 321 | C (AN, BN)<br>COMT | 16.6  | 100% | CAPS-SPP<br>CAPS-SOP | EDI-2<br>EAT                                       | <u>ED group, AN+BN, n = 108:</u><br>- CAPS total score/EDI-2 = $r=0.49^{**}$<br>- CAPS-SOP/EDI-2: $r=0.43^{**}$<br>- CAPS-SPP/EDI-2: $r=0.40^{**}$<br><u>Healthy controls group, n=213:</u><br>- CAPS total score/EDI-2 () = $r=0.43^{**}$<br>- CAPS-SOP/EDI-2: $r=0.32^{**}$<br>- CAPS-SPP/EDI-2: $r=0.42^{**}$ | 5 <sup>#</sup> |
| (Kirsh et al., 2007)*            | A | 75  | COMT<br>C (EDs)    | 12.78 | 100% | CAPS-SPP<br>CAPS-SOP | DSM-IV<br>DICA-R<br>BMI<br>ChEAT<br>(Global score) | <u>MANOVA</u><br>- CAPS-SOP: C > High ChEAT > Low ChEAT*<br>- CAPS-SPP: No significant group difference                                                                                                                                                                                                          | 4 <sup>#</sup> |
| (Eddy et al., 2007)*             | A | 122 | C (BED)            | 11.49 | 56%  | EDI-II-P             | ChEDE (global score)<br>ChEDE-WC<br>ChEDE-SC       | <u>Pearson correlation:</u><br>- EDI-II-P/ChEDE-WC: $r= -0.17$ (NS)<br>- EDI-II-P/ChEDE-SC: $r= -0.16$ (NS)<br>- EDI-II-P/BMS-BE: $r= -0.12$ (NS)                                                                                                                                                                | 6 <sup>#</sup> |

|                            |   |    |        |      |     |                                  |                                                                                             |                                                                                                                                                                                                                                                                                                                                                                                                                                                                                                                                                                                                                          |                |
|----------------------------|---|----|--------|------|-----|----------------------------------|---------------------------------------------------------------------------------------------|--------------------------------------------------------------------------------------------------------------------------------------------------------------------------------------------------------------------------------------------------------------------------------------------------------------------------------------------------------------------------------------------------------------------------------------------------------------------------------------------------------------------------------------------------------------------------------------------------------------------------|----------------|
|                            |   |    |        |      |     |                                  | ChEDE-<br>DR<br>ChEDE-<br>EAC<br>BMS-<br>BE<br>SATAQ<br>-ITI                                | - EDI-II-P/SATAQ-<br>ITI: $r = -0.30^{***}$                                                                                                                                                                                                                                                                                                                                                                                                                                                                                                                                                                              |                |
| (Serpell et al.,<br>2006)* | A | 49 | C (AN) | 15.2 | 94% | HMPS-SOP<br>HMPS-SPP<br>HMPS-OOP | ChEDE<br>(global<br>score)<br>ChEDE-<br>RT<br>ChEDE-<br>EAC<br>ChEDE-<br>WC<br>ChEDE-<br>SC | <u>Pearson correlation:</u><br>- HMPS-<br>SOP/ChEDE(global<br>score): $r=0.243$ (NS)<br>- HMPS-<br>OOP/ChEDE(global<br>score): $r= -0.081$ (NS)<br>- HMPS-<br>SPP/ChEDE(global<br>score): $r=0.214$ (NS)<br>- HMPS-SOP/ChEDE-<br>RT: $r= 0.264$ (NS)<br>- HMPS-OOP/ChEDE-<br>RT: $r= 0.008$ (NS)<br>- HMPS-SPP/ChEDE-<br>RT: $r=0.229$ (NS)<br>- HMPS-SOP/ChEDE-<br>EAC: $r= -0.005$ (NS)<br>- HMPS-OOP/ChEDE-<br>EAC: $r= -0.122$ (NS)<br>- HMPS-SPP/ChEDE-<br>EAC: $r= -0.101$ (NS)<br>- HMPS-SOP/ChEDE-<br>WC: $r=0.222$ (NS)<br>- HMPS-OOP/ChEDE-<br>WC: $r= -0.106$ (NS)<br>- HMPS-SPP/ChEDE-<br>WC: $r=0.294$ (NS) | 4 <sup>#</sup> |

|                           |   |      |        |      |      |         |                                                                                                                                    |                                                                                                                                                                                                                                                                                                                                                                                 |                 |
|---------------------------|---|------|--------|------|------|---------|------------------------------------------------------------------------------------------------------------------------------------|---------------------------------------------------------------------------------------------------------------------------------------------------------------------------------------------------------------------------------------------------------------------------------------------------------------------------------------------------------------------------------|-----------------|
|                           |   |      |        |      |      |         |                                                                                                                                    | <ul style="list-style-type: none"> <li>- HMPS-SOP/ChEDE-SC: <math>r=0.203</math> (NS)</li> <li>- HMPS-OOP/ChEDE-SC: <math>r=-0.051</math> (NS)</li> <li>- HMPS-SPP/ChEDE-SC: <math>r=0.246</math> (NS)</li> </ul>                                                                                                                                                               |                 |
| (Nilsson & Hägglöf, 2005) | B | 68   | C (AN) | 15.0 | 100% | EDI-P   | BMI<br>EDI<br>(Global score)<br>EDI-DT<br>EDI-BN<br>EDI-BD<br>EDI-IN<br>EDI-ID<br>EDI-IA<br>EDI-MF<br>EDI-ASC<br>EDI-IR<br>EDI-INS | <u>Wilcoxon signed-ranks test:</u><br>AN: EDI-P: 96 months > 192 months (NS)                                                                                                                                                                                                                                                                                                    | 7 <sup>##</sup> |
| (Franko et al., 2004)     | B | 2379 | COMT   | 9.5  | 100% | EDI-C-P | EDI-C-DT<br>EDI-C-B<br>EDI-C-BD<br>EDI-C-I<br>EDI-C-P<br>EDI-C-ID<br>EDI-C-IA<br>EDI-C-MF                                          | A principal components analysis (PCA) using oblique rotation (promax). The analysis was restricted to eight factors, based on the original eight EDI subscales. Loadings greater than 0.35 were considered meaningful or significant. <ul style="list-style-type: none"> <li>- EDI-C-P/EDI-C-DT: NR</li> <li>- EDI-C-P/ EDI-C-B: NR</li> <li>- EDI-C-P/ EDI-C-BD: NR</li> </ul> | 4 <sup>##</sup> |

|                        |   |     |                |       |      |                             |                    |                                                                                                                                                                                                                                                                                                                                        |                 |
|------------------------|---|-----|----------------|-------|------|-----------------------------|--------------------|----------------------------------------------------------------------------------------------------------------------------------------------------------------------------------------------------------------------------------------------------------------------------------------------------------------------------------------|-----------------|
|                        |   |     |                |       |      |                             |                    | <ul style="list-style-type: none"> <li>- EDI-C-P/ EDI-C-I: NR</li> <li>- EDI-C-P/ EDI-C-P: NR</li> <li>- EDI-C-P/ EDI-C-ID: NR</li> <li>- EDI-C-P/ EDI-C-IA: NR</li> <li>- EDI-C-P/ EDI-C-MF: NR</li> </ul>                                                                                                                            |                 |
| (McVey et al., 2004)*  | B | 258 | COMT           | 11.18 | 100% | CAPS-SPP<br>CAPS-SOP        | SIQYA-BDS<br>ChEAT | ANOVA (Group (intervention and control) by time (baseline, postintervention, 6-month, and 12-month follow-up): The intervention was successful in improving body image satisfaction and global self-esteem and in reducing dieting attitude scores at postintervention only.                                                           | 3 <sup>##</sup> |
| (Castro et al., 2004)* | A | 184 | COMT<br>C (AN) | 14.95 | 100% | CAPS-SPP<br>CAPS-SOP<br>PSS | DSM IV<br>EAT-40   | <u>t test:</u> <ul style="list-style-type: none"> <li>- CAPS-SOP: AN&gt;HC***</li> <li>- CAPS-SPP: No difference between AN and HC (NS)</li> <li>- PSS: AN&gt;HC***</li> </ul> <u>Pearson correlation:</u><br>AN <ul style="list-style-type: none"> <li>- CAPS-SPP/EAT-40: r = 0.24*</li> <li>- CAPS-SOP/EAT-40: r = 0.32**</li> </ul> | 3 <sup>#</sup>  |

|                           |   |                       |      |                |        |       |                                       |                                                                                                                                                                                                                                                                                                                                                                                           |                 |
|---------------------------|---|-----------------------|------|----------------|--------|-------|---------------------------------------|-------------------------------------------------------------------------------------------------------------------------------------------------------------------------------------------------------------------------------------------------------------------------------------------------------------------------------------------------------------------------------------------|-----------------|
|                           |   |                       |      |                |        |       |                                       | - PSS/EAT-40: $r = 0.38^{**}$                                                                                                                                                                                                                                                                                                                                                             |                 |
| (McCabe & Vincent, 2003)* | A | 306 girls<br>297 boys | COMT | 13.66<br>13.89 | 50.75% | EDI-P | BMI<br>BULIT-R<br>-BE<br>-EWL<br>-BUS | <u>Standard Multiple Regression</u><br><i>Girls</i> <ul style="list-style-type: none"> <li>- EDI-P/BULIT-R-EWL: NS</li> <li>- EDI-P/BULIT-R-BUS: NS</li> <li>- EDI-P/BULIT-R-BE: NS</li> </ul> <i>Boys</i> <ul style="list-style-type: none"> <li>- EDI-P/BULIT-R-EWL: NS</li> <li>- EDI-P/BULIT-R-BUS: NS</li> <li>- EDI-P/BULIT-R-BE: <math>\beta = 0.13, sr^2 = 0.02</math></li> </ul> | 3 <sup>#</sup>  |
| (Shaw et al., 2004)*      | B | 496                   | COMT | 13.0           | 100%   | EDI-P | SDBPS<br>EDE                          | <u>Correlation</u> <ul style="list-style-type: none"> <li>- EDI-P(T3)/SDBPS (T3) : <math>r = 0.08</math> (NS)</li> <li>- EDI-P(T3)/EDE (T3) : <math>r = 0.12^*</math></li> <li>- EDI-P(T3)/EDE (T4) : <math>r = 0.03</math> (NS)</li> </ul> <u>Hierarchical regression models</u><br>Predicting increase in EDE over a year (T3, T4)<br>EDI-P, $B = -0.008, r = -0.02$ (NS)               | 4 <sup>##</sup> |
| (Wiseman et al., 2004)    | B | 188                   | COMT | 15.5           |        | EDI-P | EDI-DT<br>EDI-BD<br>EDI-ID            | ANOVA, all analyses were conducted separately by country (Italy and USA).                                                                                                                                                                                                                                                                                                                 | 5 <sup>##</sup> |

|                          |   |      |      |    |      |                                          |                                                                  |                                                                                                                                                                                                                                                                                                                                                                                                                                                                          |                |
|--------------------------|---|------|------|----|------|------------------------------------------|------------------------------------------------------------------|--------------------------------------------------------------------------------------------------------------------------------------------------------------------------------------------------------------------------------------------------------------------------------------------------------------------------------------------------------------------------------------------------------------------------------------------------------------------------|----------------|
|                          |   |      |      |    |      |                                          | EDI-IA<br>EDI-MF<br>TFEQ                                         | For the Italian group, there were significant effects for DT for time ( $F(1,116)=28.17$ , $p<.0001$ ), as well as a time $\times$ intervention interaction ( $F(1,116)=5.88$ , $p=.017$ ). Italian subjects in the intervention condition showed a significant decrease in DT from the baseline to post-intervention.<br><br>- EDI-DT/ EDI-P : NR<br>- EDI-BD/ EDI-P : NR<br>- EDI-ID/ EDI-P : NR<br>- EDI-IA/ EDI-P : NR<br>- EDI-MF/ EDI-P : NR<br>- TFEQ/ EDI-P : NR |                |
| (Leung et al., 2004)     | A | 2256 | COMT | NR | 100% | EDI-P                                    | EDI-DT<br>EDI-B<br>EDI-BD<br>EDI-I<br>EDI-ID<br>EDI-IA<br>EDI-MF | Psychometric properties of the EDI among Chinese adolescent girls in Hong Kong.<br>- EDI-DT/EDI-P: NR<br>- EDI-B/EDI-P: NR<br>- EDI-BD/EDI-P: NR<br>- EDI-I/EDI-P: NR<br>- EDI-ID/EDI-P: NR<br>- EDI-IA/EDI-P: NR<br>- EDI-MF/EDI-P: NR                                                                                                                                                                                                                                  | 3 <sup>#</sup> |
| (Ruggiero et al., 2003)* | A | 42   | COMT | NR | 100% | FMPS-CM<br>FMPS-PS<br>FMPS-PE<br>FMPS-PC | BMI<br>EDI-I-<br>DT<br>EDI-I-<br>BD                              | <u>Linear regression analysis:</u><br><i>Average Day</i><br>- FMPS-CM/EDI-I-DT: $\beta=0.362$ (NS)                                                                                                                                                                                                                                                                                                                                                                       | 4 <sup>#</sup> |

|  |  |  |  |  |  |  |  |                                                                                                                                                                                                                                                                                                                                                                                                                                                                                                                                                                                                                                                                                                                                                                                                                                                                                                                                                                                                                                                                                                                                                                                                                                                                 |  |
|--|--|--|--|--|--|--|--|-----------------------------------------------------------------------------------------------------------------------------------------------------------------------------------------------------------------------------------------------------------------------------------------------------------------------------------------------------------------------------------------------------------------------------------------------------------------------------------------------------------------------------------------------------------------------------------------------------------------------------------------------------------------------------------------------------------------------------------------------------------------------------------------------------------------------------------------------------------------------------------------------------------------------------------------------------------------------------------------------------------------------------------------------------------------------------------------------------------------------------------------------------------------------------------------------------------------------------------------------------------------|--|
|  |  |  |  |  |  |  |  | <ul style="list-style-type: none"> <li>- FMPS-PS/EDI-I-DT:<br/><math>\beta = -0.035</math> (NS)</li> <li>- FMPS-PE/EDI-I-DT:<br/><math>\beta = -0.133</math> (NS)</li> <li>- FMPS-PC/EDI-I-DT:<br/><math>\beta = 0.380^*</math></li> <li>- FMPS-CM/EDI-I-BD:<br/><math>\beta = 0.458^{**}</math></li> <li>- FMPS-PS/EDI-I-BD:<br/><math>\beta = -0.116</math> (NS)</li> <li>- FMPS-PE/EDI-I-BD:<br/><math>\beta = -0.071</math> (NS)</li> <li>- FMPS-PC/EDI-I-BD:<br/><math>\beta = 0.421^{**}</math></li> </ul> <p><i>Exam Day</i></p> <ul style="list-style-type: none"> <li>- FMPS-CM/EDI-I-DT:<br/><math>\beta = 0.323</math> (NS)</li> <li>- FMPS-PS/EDI-I-DT:<br/><math>\beta = -0.026</math> (NS)</li> <li>- FMPS-PE/EDI-I-DT:<br/><math>\beta = -0.038</math> (NS)</li> <li>- FMPS-PC/EDI-I-DT:<br/><math>\beta = 0.230</math> (NS)</li> <li>- FMPS-CM/EDI-I-BD:<br/><math>\beta = 0.448^{**}</math></li> <li>- FMPS-PS/EDI-I-BD:<br/><math>\beta = -0.169</math> (NS)</li> <li>- FMPS-PE/EDI-I-BD:<br/><math>\beta = -0.044</math> (NS)</li> <li>- FMPS-PC/EDI-I-BD:<br/><math>\beta = 0.325</math> (NS)</li> </ul> <p><i>Result Day</i></p> <ul style="list-style-type: none"> <li>- FMPS-CM/EDI-I-DT:<br/><math>\beta = 0.560^{**}</math></li> </ul> |  |
|--|--|--|--|--|--|--|--|-----------------------------------------------------------------------------------------------------------------------------------------------------------------------------------------------------------------------------------------------------------------------------------------------------------------------------------------------------------------------------------------------------------------------------------------------------------------------------------------------------------------------------------------------------------------------------------------------------------------------------------------------------------------------------------------------------------------------------------------------------------------------------------------------------------------------------------------------------------------------------------------------------------------------------------------------------------------------------------------------------------------------------------------------------------------------------------------------------------------------------------------------------------------------------------------------------------------------------------------------------------------|--|

|                         |   |     |      |      |      |                      |                                                   |                                                                                                                                                                                                                                                                                                                                                                                                                                                                    |                 |
|-------------------------|---|-----|------|------|------|----------------------|---------------------------------------------------|--------------------------------------------------------------------------------------------------------------------------------------------------------------------------------------------------------------------------------------------------------------------------------------------------------------------------------------------------------------------------------------------------------------------------------------------------------------------|-----------------|
|                         |   |     |      |      |      |                      |                                                   | <ul style="list-style-type: none"> <li>- FMPS-PS/EDI-I-DT: <math>\beta=0.228</math> (NS)</li> <li>- FMPS-PE/EDI-I-DT: <math>\beta=0.326^*</math></li> <li>- FMPS-PC/EDI-I-DT: <math>\beta=0.499^{**}</math></li> <li>- FMPS-CM/EDI-I-BD: <math>\beta=0.585^{***}</math></li> <li>- FMPS-PS/EDI-I-BD: <math>\beta= -0.076</math> (NS)</li> <li>- FMPS-PE/EDI-I-BD: <math>\beta= -0.031</math></li> <li>- FMPS-PC/EDI-I-BD: <math>\beta=0.440^{**}</math></li> </ul> |                 |
| (Simmons et al., 2002)* | A | 692 | COMT | 14.3 | 100% | EDI-P                | BULIT-R<br>TREI                                   | <u>TREI/EDI-P :</u> <ul style="list-style-type: none"> <li>- Seventh Grade (n=392): <math>r = 0.18</math>, NS</li> <li>- Tenth Grade (n=300): <math>r = 0.11</math>, NS</li> </ul> BULIT-R/EDI-P: NR                                                                                                                                                                                                                                                               | 5 <sup>#</sup>  |
| (McVey et al., 2002)*   | A | 363 | COMT | 12.9 | 100% | CAPS<br>-SOP<br>-SPP | ChEAT                                             | <u>Hierarchical Multiple Regression</u> <ul style="list-style-type: none"> <li>- ChEAT/CAPS-SOP : <math>\beta= 0.18</math>, <math>T=2.90</math>, <math>SSPr = 0.02</math> <math>p&lt;0.01</math></li> <li>- ChEAT/CAPS-SPP : <math>\beta= -0.01</math>, <math>T= -0.13</math>, NS</li> </ul>                                                                                                                                                                       | 4 <sup>#</sup>  |
| (Tyrka et al., 2002)    | B | 157 | COMT | NR   | 100% | EDI-P                | DSM IV<br>SCID<br>BMI<br>EAT-26<br>(global score) | <u>Multivariate analyses</u><br>EDI-P(baseline)/AN syndrome (8 years):<br>Unstandardized $\beta = 0.746^{**}$                                                                                                                                                                                                                                                                                                                                                      | 5 <sup>##</sup> |

|                          |   |     |              |      |      |                               |                                                                               |                                                                                                                                                                                                                           |                |
|--------------------------|---|-----|--------------|------|------|-------------------------------|-------------------------------------------------------------------------------|---------------------------------------------------------------------------------------------------------------------------------------------------------------------------------------------------------------------------|----------------|
|                          |   |     |              |      |      |                               | EAT-26-RT<br>EAT-26-OC<br>EAT-26-BN                                           |                                                                                                                                                                                                                           |                |
| (Wade & Lowes, 2002)     | A | 323 | COMT         | 14.0 | 100% | FMPS-CM<br>FMPS-PE<br>FMPS-PC | EDE-Q-WSC<br>EDE-Q-DR<br>EDE-Q-BN                                             | PE, CM, and PC effect on overvalued ideas were partially mediated by self-esteem.                                                                                                                                         | 3 <sup>#</sup> |
| (Cassidy et al., 1999)   | A | 49  | C (EDs, PCG) | 15.6 | 96%  | EDI-P                         | ICD 10                                                                        | <u>MANOVA</u><br><i>ED Group</i><br>EDI-P<br>M= 7.00, SE = 0.94<br><br><i>Psychiatric Control Group</i><br>EDI-P<br>M=4.09, SE= 0.92<br><br>F=4.48, p < 0.05                                                              | 7 <sup>#</sup> |
| (Fulkerson et al., 1999) | A | 678 | COMT         | NR   | 54%  | EDI-I-P                       | BMI<br>RRS<br>EDI-I-BN<br>EDI-I-BD<br>EDI-I-IN<br>EDI-I-DT<br>EDI-I-IA<br>EDC | <u>MANOVA:</u><br><i>Girl Athletes</i><br>EDI-I-DT: High EDI-I-P > Low EDI-I-P<br>EDI-I-IA: High EDI-I-P > Low EDI-I-P<br>EDI-I-BN: No group difference<br>EDI-I-IN: No group difference<br>EDI-I-BD: No group difference | 4 <sup>#</sup> |

|                            |   |     |      |      |       |         |                                                               |                                                                                                                                                                                                                                                                                                                                                                                         |                |
|----------------------------|---|-----|------|------|-------|---------|---------------------------------------------------------------|-----------------------------------------------------------------------------------------------------------------------------------------------------------------------------------------------------------------------------------------------------------------------------------------------------------------------------------------------------------------------------------------|----------------|
|                            |   |     |      |      |       |         |                                                               | RRS: No group difference<br>BMI: No group difference<br>EDC: No group difference<br><br><i>Male Athletes</i><br>EDC: High EDI-I-P<br>>Low EDI-I-P<br>RRS: High EDI-I-P<br>>Low EDI-I-P<br>EDI-I-DT: No group difference<br>EDI-I-IA: No group difference<br>EDI-I-BN: No group difference<br>EDI-I-IN: No group difference<br>EDI-I-BD: No group difference<br>BMI: No group difference |                |
| (Rosenvinge et al., 1999)* | A | 678 | COMT | 15.4 | 68.5% | SCANS-P | DSM-IV<br>BMI<br>EDI-I-DT<br>EDI-I-BN<br>EDI-I-BD<br>SCANS-GD | <u>ANOVA</u><br>SCANS-P: No difference between ED, HC and at risk for ED<br>('at-risk' group consisting of subjects who were dieting, or explicitly considering dieting, as a way to handle personal problems and a slim body as the solution, without, however, satisfying any                                                                                                         | 6 <sup>#</sup> |

|                               |   |      |                           |       |      |       |                                                                                                                                                                  |                                                                                                                                      |                 |
|-------------------------------|---|------|---------------------------|-------|------|-------|------------------------------------------------------------------------------------------------------------------------------------------------------------------|--------------------------------------------------------------------------------------------------------------------------------------|-----------------|
|                               |   |      |                           |       |      |       |                                                                                                                                                                  | DSM-IV eating disorder criteria).                                                                                                    |                 |
| (Pla & Toro, 1999)            | B | 93   | COMT<br>C (AN)            | 14.6  | 100% | EDI-P | STCPD<br>EAT-26<br>EDI<br>(global score)<br>EDI-DT<br>EDI-BN<br>EDI-BD<br>EDI-IN<br>EDI-ID<br>EDI-IA<br>EDI-MF<br>BAT<br>(global score)<br>IBI<br>(global score) | <u>Pearson correlation:</u><br>AN: EDI-P (Baseline) /PSRS (8years):<br>r=0.45***                                                     | 6 <sup>##</sup> |
| (Santonastaso et al., 1999)*  | B | 359  | C (BN)                    | 16.1  | 100% | EDI-P | DSM-IV<br>SCID<br>BMI<br>EAT-40<br>EDI<br>(Global score)<br>EDI-DT<br>BAT                                                                                        | <u>t-test:</u> EDI-P: Non-recovery > recovery, t = 2.42*                                                                             | 6 <sup>##</sup> |
| (Striegel-Moore et al., 2000) | B | 2379 | COMT<br>(Black and White) | 11-16 | 100% | EDI-P | EDI<br>-BD<br>-DT<br>-BN<br>-IA<br>-ID<br>-IN                                                                                                                    | <u>ANOVA</u><br>With increasing age, Perfectionism scores decreased (F = 8.82, p < .0001)<br>The same for Interpersonal Distrust and | 6 <sup>##</sup> |

|                            |   |     |            |       |      |         |                                                                            |                                                                                                                                                                                                                                                                                                                                                                                                                          |                 |
|----------------------------|---|-----|------------|-------|------|---------|----------------------------------------------------------------------------|--------------------------------------------------------------------------------------------------------------------------------------------------------------------------------------------------------------------------------------------------------------------------------------------------------------------------------------------------------------------------------------------------------------------------|-----------------|
|                            |   |     |            |       |      |         | -MF                                                                        | <p>age (<math>F = 19.85, p &lt; .0001</math>),</p> <p>Interceptive Awareness scores decreased significantly with increasing age (<math>F = 14.34, p &lt; .0001</math>).</p> <p>Bulimia scores decreased with increasing age in both black and white girls</p> <p>These data suggest that with increasing age, EDI scores decrease in all scales except Body Dissatisfaction, Drive for Thinness, and Ineffectiveness</p> |                 |
| (Wiederman & Pryor, 1998)* | A | 110 | C (AN, BN) | 15.43 | 100% | EDI-I-P | DSED<br>EDI-DT<br>EDI-BN<br>EDI-BD<br>EDI-IN<br>EDI-ID<br>EDI-IA<br>EDI-MF | <u>Pearson correlation:</u><br>- EDI-I-P/Diagnosis (AN and BN): $r=0.07$ (NS)                                                                                                                                                                                                                                                                                                                                            | 4 <sup>#</sup>  |
| (Calam & Waller, 1998)     | B | 92  | COMT       | 12.8  | 100% | SCANS-P | EAT-26<br>BITE<br>-Purging<br>- Severity                                   | <u>Spearman correlation</u><br>- SCANS-P(T1)/BITE-Severity(T2)<br>$\rho = -0.216^*$<br>- SCANS-P(T1)/BITE-Purging(T2)                                                                                                                                                                                                                                                                                                    | 5 <sup>##</sup> |

|                           |   |     |      |       |      |         |                                                                                         |                                                                                                                                                        |                  |
|---------------------------|---|-----|------|-------|------|---------|-----------------------------------------------------------------------------------------|--------------------------------------------------------------------------------------------------------------------------------------------------------|------------------|
|                           |   |     |      |       |      |         | SCANS-GD                                                                                | rho = -.172 (NS)                                                                                                                                       |                  |
| (Fryer et al., 1997)*     | A | 286 | COMT | 14.70 | 100% | SCANS-P | SCANS-GD<br>EAT-26                                                                      | <u>Correlations</u><br>- SCANS-P/SCANS-GD : r= -0.27**<br>- SCANS-P/EAT-26: NS<br><br><u>Linear regression:</u> EAT-26/SCANS-P: B=0.25, NS             | 3 <sup>#</sup>   |
| (al-Subaie et al., 1996)  | A | 118 | COMT | 15.8  | 100% | EDI-P   | EDI-DT<br>EDI-BN<br>EDI-BD<br>EDI-IN<br>EDI-ID<br>EDI-IA<br>EDI-MF                      | - EDI-DT/EDI-P: NR<br>- EDI-BN/EDI-P: NR<br>- EDI-BD/EDI-P: NR<br>- EDI-IN/EDI-P: NR<br>- EDI-ID/EDI-P: NR<br>- EDI-IA/EDI-P: NR<br>- EDI-MF/EDI-P: NR | - 5 <sup>#</sup> |
| (Tiggemann & Dyer, 1995)* | A | 152 | COMT | 15.0  | 100% | EDI-C-P | EDI-I-DT<br>EDI-I-BN<br>EDI-I-BD<br>EDI-I-IN<br>EDI-I-ID<br>EDI-I-IA<br>EDI-I-MF<br>RST | <u>Pearson correlation:</u><br>- EDI-I-P/RST: r = 0.17*                                                                                                | 1 <sup>#</sup>   |
| (Steiger et al., 1992)    | A | 715 | COMT | 14.60 | 100% | EDI-P   | EAT-26                                                                                  | <u>ANOVA</u><br><i>Asymptomatic (n=342)</i><br>- EDI-P = 2.73 (0.79)                                                                                   | 5 <sup>#</sup>   |

|                        |   |     |      |       |      |       |                                                                      |                                                                                                                                                                                                                                                                                                                |                  |
|------------------------|---|-----|------|-------|------|-------|----------------------------------------------------------------------|----------------------------------------------------------------------------------------------------------------------------------------------------------------------------------------------------------------------------------------------------------------------------------------------------------------|------------------|
|                        |   |     |      |       |      |       |                                                                      | <i>Mood Disorder (n=68)</i><br>- EDI-P = 3.03(0.84)<br><br><i>Eating Disorder (n=34)</i><br>- EDI-P = 3.15(0.79)<br><br><i>Eating and Mood Disorder (n=62)</i><br>- EDI-P = 3.19(0.88):<br>F(3,502) = 9.09***                                                                                                  |                  |
| (Steiger et al., 1991) | A | 715 | COMT | 14.60 | 100% | EDI-P | EAT-26                                                               | <u>ANOVA</u><br><i>Restrictor (n=14):</i> EDI-P = 3.45(0.77)<br><i>Underweight Binger (n=10):</i> EDI-P = 2.82(0.47)<br><i>NormalWeight Binger (n=20):</i> EDI-P = 3.31(0.78)<br><i>Atypical (n=50):</i> EDI-P = 3.13(0.88)<br><i>Asymptomatic (n=410):</i> EDI-P = 2.78(0.81)<br>F(4,500) = 5.80,<br>p<0.0001 | 2 <sup>#</sup>   |
| (Shore & Porter, 1990) | A | 610 | COMT | 13.7  | 68%  | EDI-P | EDI-I-DT<br>EDI-I-BN<br>EDI-I-BD<br>EDI-I-IN<br>EDI-I-ID<br>EDI-I-IA | - EDI-I-DT/EDI-P: NR<br>- EDI-I-BN/EDI-P: NR<br>- EDI-I-BD/EDI-P: NR<br>- EDI-I-IN/EDI-P: NR<br>- EDI-I-ID/EDI-P: NR<br>- EDI-I-IA/EDI-P: NR<br>- EDI-I-MF/EDI-P: NR                                                                                                                                           | - 5 <sup>#</sup> |

|                                |   |     |      |       |      |         |                                      |                                                                                                                                                                           |                  |
|--------------------------------|---|-----|------|-------|------|---------|--------------------------------------|---------------------------------------------------------------------------------------------------------------------------------------------------------------------------|------------------|
|                                |   |     |      |       |      |         | EDI-I-MF                             |                                                                                                                                                                           |                  |
| (Cole & Edelman, 1987)         | A | 184 | COMT | 15.5  | 100% | EDI-P   | BEQ<br>RS-RT                         | - EDI-P/BEQ = NR<br>- EDI-P/RS-RT = NR                                                                                                                                    | - 3 <sup>#</sup> |
| (Faust, 1987)*                 | A | 68  | COMT | 13.2  | 100% | EDI-I-P | EDI-DT<br>EDI-BD<br>EDI-IA<br>EDI-IN | <u>Pearson correlation:</u><br>- EDI-I-P/EDI-I-DT: r=0.23 (NS)<br>- EDI-I-P/EDI-I-BD: r = 0.04 (NS)<br>- EDI-I-P/EDI-I-IA: r =0.28*<br>- EDI-I-P/EDI-I-IN: r = -0.06 (NS) | 3 <sup>#</sup>   |
| (Pumariega & LaBarbera, 1986)* | A | 119 | COMT | 17.26 | 100% | SPP     | ChEAT (total score)<br>ChEAT-DTG     | <u>Pearson correlation:</u><br>- SPP/ChEAT (total score): r = 0.173, p=0.06<br>- SPP/ChEAT-DTG: r= 0.108, NS                                                              | 6 <sup>#</sup>   |

Note. \*Indicates used in the meta-analysis. Studies are presented in chronological order. A = Cross-sectional studies; B = Longitudinal studies; <sup>#</sup> : The modified version of the Newcastle-Ottawa quality assessment scale was used for cross-sectional study (Herzog et al., 2013); <sup>##</sup> : The Newcastle-Ottawa quality assessment scale was used for longitudinal study (Wells et al., 2014). EDs: Eating disorders; Clinical = C; Community = COMT; PCG = Psychiatric Controls Group; \* p < .05, \*\* p < .01, \*\*\* p < .001; NR = not reported; N: global score number of participants; NS = Non-significant; ○ = Study used in the quantitative study; AN = Anorexia nervosa; A-AN = Atypical Anorexia Nervosa; BN = Bulimia nervosa; RED = Restrictive and/or Exercise Disorder; SES = Socio-Economic Status; BMI = Body Mass Index. IBW = the standard provided for minimally normal body weight by the DSM-IV (American Psychiatric Association, 1994). Abbreviations for scales: **ABOS** = Anorectic Behaviour Observation Scale (Salbach-Andrae et al., 2009). **APS** = Appearance Perfectionism Scale (Srivastava, 2009). D = Discrepancy - on the **APS-R** = Almost Perfect Scale- Revised (Slaney et al., 2001). **BEQ** = Binge Eating Questionnaire (Halmi et al., 1981). AP = Appearance, AT = Attribution, WS = Weight Satisfaction - on the **BES** = Body-Esteem Scale Canadian French Version (Beaudoin et al., 2001). **BINES** = Binge Eating Scale (Gormally et al., 1982). **BITE** = Bulimic Investigatory Test (Henderson & Freeman, 1987). BE = Binge Eating - on the **BMS** = Bulimic Modeling Scale (Stice, 1998). **BSQ** = Body Shape Questionnaire (Conti et al., 2009). BE = Binge Eating, BUS = Bulimic Symptoms, EWL = Extreme Weight Loss - on the **BULIT-R** = Bulimia Test Revised (Thelen et al., 1991). **BUT** = Body Uneasiness Test (Cuzzolaro et al., 2006). SOP = Self-Oriented Perfectionism, SPP = Socially Prescribed Perfectionism - on the **CAPS** = Children and Adolescent Perfectionism Scale (Flett et al., 1992). **CDRS** = Contour Drawing Rating Scale (Thompson & Gray, 1995). OC = Oral Control, DTG = Dieting - on the **ChEAT** = Child Eating Attitudes Test (Maloney et al., 1988). **ChEAT-F** = French version of ChEAT (Sénécal unpublished dissertation, 2010). EC = Eating Concerns, SC = Shape Concerns, WC = Weight Concerns, BE = Binge Eating, WSC = Weight Shape

Concern, RT = Restraint - on the **ChEDE** = Eating Disorder Examination adapted for Children (Bryant-Waugh et al., 1996). **CH/ASRS** = Child/Adolescent Version of the Silhouette Rating Scale (Collins, 1991). **CPI** = Child Perfectionism Questionnaire (Oros, 2003). **CPQ** = Clinical Perfectionism Questionnaire (Moessner et al., 2015). **CR-EAT** = Clinical and Research Inventory for Eating Disorders. **DEBQ-RT (fr)** = Dutch Eating Behaviour Questionnaire-Restraint Scale french version (van Strien et al., 1986). **DT** = Drive for Thinness, **BRB** = Bulimic Related Behavior, **SPE** = Social Pressure to Eat - on the **EAT-25** = Eating Attitude Test portuguese short form (Pereira et al., 2008). **EAT-26** = Eating Attitude Test (Garner & Garfinkel, 1979; Garner et al., 1982). Sub 1 = Dieting, Sub 2 = Bulimia and food fixation/the indication of bulimia, Sub 3 = Perceived external pressure to lose weight/self-control over eating - on the **EAT-40** = Eating Attitudes Test (Garner & Garfinkel, 1979). **EDE** = Eating Disorder Examination (Fairburn & Cooper, 1993). **EDE-I** = Italian Eating Disorder Examination-Interview 12.0D (Calugi et al., 2015). **WSC** = Weight Shape Concern, **WC** = Weight Concern, **SC** = Shape Concern, **RT** = Restraint, **EAC** = Eating Concern, **PG** = Frequency of purging, **EX** = driven exercise - on the **EDE-Q** = Eating Disorder Examination-Questionnaire (Hilbert et al., 2007). **EDFHI** = The Eating Disorder Family History Interview (Strober, 1987). **EDI-C** = Eating Disorder Inventory for Children (Garner, 1991). **EDI-P** = Perfectionism Scale - on the **EDI-I** = Eating Disorder Inventory (Garner et al., 1983). **EDI-II** = Eating Disorders Inventory (Garner, 1991). **IA** = Interoceptive Awareness, **DT** = Drive for Thinness, **Bu** = Bulimia, **BD** = Body Dissatisfaction, **BE** = Binge Eating, **IN** = Ineffectiveness, **ID** = Interpersonal Distrust, **IA** = Interoceptive Awareness, **MF** = Maturity Fears, **ASC** = Asceticism, **IR** = Impulse Regulation, **INS** = Insecurity, **EDR** = Eating Disorder Risk - on the **EDI-III** = Eating Disorder Inventory-3 (Garner, 2004). **PPOS** = Perfectionnisme Positif Orienté vers Soi, **PNOS** = Perfectionnisme Négatif Orienté vers Soi on the **EPPN** = Echelle de Perfectionnisme Positif et Négatif (Turgeon et al., 2015). **HO** = Higher Order eating disorder factor on the **EDI-VS**: very short version of the Eating Disorder Inventory (Maiano et al., 2016), **WR** = weight reduction, **AF** = Attitude to food, **PS** = parenting style, **PA** = perception of own attractiveness on the **FAQ** = Food Attitude Questionnaire (Ziółkowska, 2001). **PS** = Personal Standards, **CM** = Concern Over Mistakes, **EC** = Evaluative Concerns, **DA** = Doubts about Actions, **PE** = Parental Expectations, **PC** = Parental Criticism and **O** = Organization - on the **FMPS** = Frost Multidimensional Perfectionism Scale (Frost et al., 1990). **OOP** = Other Oriented Perfectionism - on the **HMPS** = Hewitt & Flett Multidimensional Perfectionism Scale (Hewitt & Flett, 1991). **IBSS-R** = Ideal-Body Stereotype Scale-Revised (Stice & Agras, 1998). **ICD-10** = Classification of Mental and Behavioural Disorders (World Health Organization, 1992). **MBSRQ-AE** = Multidimensional Body-Self Relations Questionnaire-Appearance Evaluation (Thompson et al., 1999). **MPS** = Multidimensional Perfectionism Scale (Hewitt et al., 1991). **PAA** = Perceptions about appearance - on the **SDQ** = self-description questionnaire (Marsh et al., 2006). **PDQ-R** = Personality Diagnostic Questionnaire-Revised (Hyler & Reider, 1987). **CP** = Conscientious Perfectionism, **SEP** = Self-Evaluative Perfectionism - on the **PI** = The Perfectionism Inventory (Hill et al., 2004). **PPBT** = Perceived Pressure to Be Thin - on the **PSPS** = Perceived Sociocultural Pressure Scale (Stice et al., 1996). **PSRS** = Psychiatric Status Rating Scale (Herzog et al., 1993). **PSS** = Perfectionistic Self-Presentation Scale (Hewitt et al., 1995). **RT** = Restraint Scale (Herman & Mack, 1975). **RST** = Rating of silhouettes task (Fallon & Rozin, 1985). **SC** = Self-Criticism on the **SASB** = Structural Analysis of Social Behaviour (Benjamin, 2000). **ITI** = Internalization of the Thin Ideal, **AWA** = Awareness, **MP** = Media Pressure - on the **SATAQ-3** = Sociocultural Attitudes Towards Appearance Scale-3 (Thompson et al., 2004). **SATPABI** = Polish Sociocultural Attitudes Towards Physical Appearance and Body Image Inventory based on **SATAQ** (Izydorczyk & Sitnik-Warchulska, 2018). **SBFD** = Stunkard Body Figure Drawings (Stunkard et al., 1983). **P** = Perfectionism, **GD** = General Dissatisfaction - on the **SCANS** = Setting Conditions for Anorexia and Bulimia Scale (Slade et al., 1990). **SCID** = Structured Clinical Interview for DSM (First et al., 2002). **SCOFF** = The Sick, Control, One, Fat, Food (Morgan et al., 1999). **SDBPS** = Satisfaction and Dissatisfaction with Body Parts Scale (Berscheid et al., 1973). **SIAB-EX** = Semi-Structured Interview for Eating Disorder (Fichter & Quadflieg, 2001). **SIQYA** = Self-Image Questionnaire for Young Adolescents (Petersen et al., 1984), body image satisfaction subscale : **BDS**. **UE** = uncontrolled eating, **CR** = cognitive restraint, **EE** = emotional eating on the **TFEQ** = Three Factor Eating Questionnaire (Stunkard & Messick, 1985). **TREI** = Thinness and Restricting Expectancy Inventory (Hohlstein et al., 1998). **Comp** = Compulsion, **Obs** = Obsession on the **YBCEDS** = Italian Yale-Brown-Cornell Eating Disorder Scale (Conti, 2002).

**Supplementary Table S4. Number of studies included in meta-analyses after data extraction.**

|                       | Global scores |        | Eating related symptoms |       |     |       |    |       |    |       |    |       |     |       |    |    |    |    |    |      |    |      |
|-----------------------|---------------|--------|-------------------------|-------|-----|-------|----|-------|----|-------|----|-------|-----|-------|----|----|----|----|----|------|----|------|
| Perfectionism scores  | EDs           |        | EAC                     |       | WSC |       | BD |       | DT |       | IA |       | ITI |       | IN |    | AT |    | BE |      | RT |      |
|                       | k             | n      | k                       | n     | k   | n     | k  | n     | k  | n     | k  | n     | k   | n     | k  | n  | k  | n  | k  | n    | k  | n    |
| <b>Unidimensional</b> | 23            | 14 197 | 0                       | NA    | 3   | 143 1 | 3  | 153 1 | 5  | 28 74 | 3  | 229 8 | 6   | 373 9 | 1  | 68 | 0  | NA | 7  | 3613 | 4  | 2061 |
| <b>PS</b>             | 18            | 4961   | 4                       | 151 0 | 7   | 372 3 | 6  | 174 6 | 3  | 77 2  | 0  | NA    | 0   | NA    | 0  | NA | 1  | 33 | 5  | 1954 | 4  | 1549 |
| <b>PC</b>             | 18            | 4105   | 4                       | 151 0 | 7   | 372 3 | 6  | 168 7 | 3  | 77 2  | 0  | NA    | 0   | NA    | 0  | NA | 1  | 33 | 6  | 2492 | 3  | 1165 |

Note. All data are related to cross-sectional associations in included studies. Studies were categorized as eligible if they contained any statistical information sufficient for extraction (i.e., a measure of association between perfectionism and any eating related symptoms). NA= Not Applicable; Number of studies included in each meta-analysis; PS = Perfectionistic strivings; PC == Perfectionistic concerns; EDs: eating related symptoms; EAC = eating concerns; WSC = weight and shape concerns; BD = body dissatisfaction; DT= drive for thinness; IA= interoceptive awareness; ITI= internalization for thin ideal; IN = ineffectiveness; BE = binge eating; RT = restraint.

**Supplementary Table S5. Instruments reported in the literature and measuring perfectionism in childhood and adolescence.**

| Scale                                                                             | Perfectionism | Perfectionistic strivings (PS)                                          | Perfectionistic concerns (PC)                                                                                                                            |
|-----------------------------------------------------------------------------------|---------------|-------------------------------------------------------------------------|----------------------------------------------------------------------------------------------------------------------------------------------------------|
| Children and Adolescent Perfectionism Scale (CAPS, (Flett et al., 1997)           | Total score   | Self-oriented perfectionism (SOP)                                       | Socially Prescribed Perfectionism (SPP)                                                                                                                  |
| Frost Multidimensional Perfectionism Scale (FMPS, (Frost et al., 1990)            | Total score   | Personal Standards (PSD)<br>Organization (O)                            | Concern Over Mistakes (COM)<br>Doubts about Actions (DA)<br>Evaluative Concerns (EC=CM+DA)/2])<br>Parental Expectations (PE)<br>Parental Criticism (PAC) |
| Hewitt & Flett Multidimensional Perfectionism Scale (HFMPs, (Hewitt et al., 1991) |               | Self-oriented perfectionism (SOP)<br>Other Oriented Perfectionism (OOP) | Socially Prescribed Perfectionism (SPP)                                                                                                                  |
| Perfectionism Inventory (PI, (Hill et al., 2004)                                  |               | Conscientious Perfectionism (CP)                                        | Self-Evaluative Perfectionism (SEP)                                                                                                                      |
| Perfectionistic Self-Presentation Scale (PSS, (Slade et al., 1990)                |               | Self-criticism (SC)                                                     | Non-Display<br>Non-Disclosure                                                                                                                            |
| Almost Perfect Scale- Revised (APS-R, (Slaney et al., 2001)                       |               |                                                                         | Discrepancy (D)                                                                                                                                          |
| Structural Analysis of Social Behaviour (SASB, (Benjamin, 2000)                   |               | Self-criticism (SC)                                                     |                                                                                                                                                          |
| Appearance Perfectionism Scale (APS, (Srivastava, 2009)                           |               | Total score                                                             |                                                                                                                                                          |

| Échelle de Perfectionnisme Positif et Négatif (EPPN,(Turgeon et al., 2015))                            |             | Positive self-oriented (PPOS)<br>Negative self-oriented (PNOS) |  |
|--------------------------------------------------------------------------------------------------------|-------------|----------------------------------------------------------------|--|
| Eating disorders total scores Inventory Perfectionism Scale (EDI-P, (Garner & Olmsted, 1986))          | Total score |                                                                |  |
| Clinical Perfectionism Questionnaire (CPQ, (Fairburn et al., 2003))                                    | Total score |                                                                |  |
| Child Perfectionism Questionnaire (CPI, (Oros, 2003))                                                  | Total score |                                                                |  |
| Setting Conditions for Anorexia and Bulimia Scale (SCABS, (Slade et al., 1990))                        | Total score |                                                                |  |
| The Clinical and Research Inventory for Eating Disorders - Perfectionism scale (Moessner et al., 2015) | Total score |                                                                |  |

Note. Self-oriented perfectionism: SOP, demanding perfection of oneself; Personal standards: PS, the setting of unrealistically high standards for oneself; Other oriented perfectionism: OOP, expecting others to hold high standards of perfectionism for themselves; Need of organization :O, need for order and neatness; Socially prescribed perfectionism: SPP; evaluative concerns: EC, evaluative concerns about being evaluated by others; Doubt about their actions: DAA, uncertainty regarding performance abilities as regards that others uphold unrealistically high expectations of them; Concerns about their mistakes: COM, highly negative reactions to perceived failures; Parental expectations: PE, placed on performance; Parental criticism: PAC, parents being overly critical; Positive self-oriented: PPOS, seeking positive consequences, results, approval ; Negative self-oriented: PNOS, avoiding negative consequences, mistakes and judgment.

**Supplementary Table S6. Summary of meta-analyses using random-effects models on the relationship between eating related symptoms total scores and perfectionism types.**

| EDs          | Perfectionism | Number of studies (k) | Authors (Year)                                                                                                                                                                                                                                                                                                                                                                                                                                                                                                                                                                                                                                                                                                           | Sample (N)                                               | Mean effect size r | 95% Confidence Interval [LL, UL] | p-value         | pFDR-value      | I <sup>2</sup> (%) |
|--------------|---------------|-----------------------|--------------------------------------------------------------------------------------------------------------------------------------------------------------------------------------------------------------------------------------------------------------------------------------------------------------------------------------------------------------------------------------------------------------------------------------------------------------------------------------------------------------------------------------------------------------------------------------------------------------------------------------------------------------------------------------------------------------------------|----------------------------------------------------------|--------------------|----------------------------------|-----------------|-----------------|--------------------|
| Global score | PS            | 21                    | 1. Castro et al, (2004)<br>2. Flamarique et al, (2019)<br>3. Kirsh et al, (2007)<br>4. Magson et al, (2019)<br>5. Wade et al. (2015)<br>Baseline<br>6. Serpell et al, (2006)<br>7. McVey et al, (2002)<br>8. Nordin-Bates et al, (2011).1<br>9. Nordin-Bates et al, (2011).2<br>10. Teixeira et al, (2017)<br>11. Iannaccone et al, (2016). 1<br>12. Iannaccone et al, (2016).2<br>13. Flett & al., (2016) (Study 3) sample 4 .1<br>14. Flett & al., (2016) (Study 3) sample 4.2<br>15. Rosewall et al, (2018)<br>16. Petisco-Rodríguez et al., (2020)<br>17. Sepulveda et al., (2021)<br>18. Swierczynska, (2020)<br>19. Turgeon et al., (2015)<br>20. Gustafsson et al., (2008)<br>21. Castro-Fornieles et al., (2007) | <b>4961</b><br><br><b>NC= 4278</b><br><br><b>CN= 683</b> | <b>0.21</b>        | <b>[0.13, 0.29]</b>              | <b>2.40E-07</b> | <b>7.50E-07</b> | <b>87.9</b>        |
|              | PC            | 21                    | 1. Campbell et al, (2018a)<br>2. Castro et al, (2004)<br>3. Flamarique et al, (2019)<br>4. Kirsh et al, (2007)<br>5. Magson et al, (2019)<br>6. Serpell et al, (2006)                                                                                                                                                                                                                                                                                                                                                                                                                                                                                                                                                    | <b>4105</b><br><br><b>NC= 3612</b><br><br><b>CN= 493</b> | <b>0.13</b>        | <b>[0.03, 0.23]</b>              | <b>7.98E-03</b> | <b>1.25E-02</b> | <b>89.5</b>        |

|  |    |    |                                                                                                                                                                                                                                                                                                                                                                                                                                                                                                                                                                                                             |                                                                                |             |                     |                 |                 |             |
|--|----|----|-------------------------------------------------------------------------------------------------------------------------------------------------------------------------------------------------------------------------------------------------------------------------------------------------------------------------------------------------------------------------------------------------------------------------------------------------------------------------------------------------------------------------------------------------------------------------------------------------------------|--------------------------------------------------------------------------------|-------------|---------------------|-----------------|-----------------|-------------|
|  |    |    | 7. McVey, Pepler, Davis, Flett & Abdodell (2002)<br>8. Nordin-Bates, Walker & Redding (2011). Sample 1<br>9. Nordin-Bates, Walker & Redding (2011). Sample 2<br>10. Dour & Theran (2011)<br>11. Teixeira et al., (2018)<br>12. Iannaccone et al, (2016). 1<br>13. Iannaccone et al, (2016).2<br>14. Flett & al., (2016) (Study 3) sample 4 .1<br>15. Flett & al., (2016) (Study 3) sample 4.2<br>16. Rosewall et al, (2018)<br>17. Petisco-Rodríguez et al., (2020)<br>18. Sepulveda et al., (2021)<br>19. Swierczynska, (2020)<br>20. Castro-Fornieles et al., (2007)<br>21. Pumariaga & LaBarbera, (1986) |                                                                                |             |                     |                 |                 |             |
|  | UN | 31 | 1. Dakanalis et al, (2018)<br>2. Drieberg et al, (2019)<br>3. Elizathe et al, (2018)<br>4. Rosenvinge et al, (1999)<br>5. Santonastaso et al, (1999)<br>6. Tiggeman & Dyer (1995)<br>7. Wiederman & Pryor (1998)<br>8. Fryer, Waller & Kroese (1997)<br>9. Francisco & al. (2015).1<br>10. Francisco & al. (2015).2<br>11. Gutiérrez & al., 2015<br>12. Flett & al., (2016) (Study 3) sample 4 .1                                                                                                                                                                                                           | <b>14197</b><br><br><b>NC=</b><br><b>13359</b><br><br><b>CN=</b><br><b>838</b> | <b>0.19</b> | <b>[0.11, 0.27]</b> | <b>3.58E-06</b> | <b>8.95E-06</b> | <b>96.2</b> |

|           |    |   |                                                                                                                                                                                                                                                                                                                                                                                                                                                                                                                                                                                                                                                                                                                                               |                                                                              |             |                     |                 |                 |              |
|-----------|----|---|-----------------------------------------------------------------------------------------------------------------------------------------------------------------------------------------------------------------------------------------------------------------------------------------------------------------------------------------------------------------------------------------------------------------------------------------------------------------------------------------------------------------------------------------------------------------------------------------------------------------------------------------------------------------------------------------------------------------------------------------------|------------------------------------------------------------------------------|-------------|---------------------|-----------------|-----------------|--------------|
|           |    |   | 13. Flett & al., (2016)<br>(Study 3) sample 4.2<br>14. Shaw et al, (2003)<br>15. Bühren & al., 2012<br>16. Plumed et al., (2017)<br>Study 1<br>17. Plumed et al., (2017)<br>Study 2<br>18. Cresswell et al.,<br>(2022)<br>19. Sepulveda et al.,<br>(2021)<br>20. Gonzalez et al.,<br>(2018) Study 1<br>21. Gonzalez et al.,<br>(2018) Study 2<br>22. Gonzalez et al.,<br>(2018) Study 3<br>23. Gonzalez et al.,<br>(2018) Study 4<br>24. Warschburger &<br>Zitzmann, (2018)<br>25. Maiano et al., 2016<br>Study 2<br>26. Maiano et al., 2016<br>Study 4<br>27. Maiano et al., 2016<br>Study 5<br>28. Mockdece Neves et<br>al., (2016)<br>29. Fortes et al., (2014)<br>30. Turgeon et al.,<br>(2011)<br>31. Castro-Fornieles et<br>al., (2007) |                                                                              |             |                     |                 |                 |              |
| <b>BE</b> | PS | 7 | 1. Curzio et al., (2018),<br>Sample 1<br>2. Curzio et al., (2018),<br>Sample 2<br>3. Curzio et al., (2018),<br>Sample 3<br>4. Boone et al., (2012)<br>5. Arcelus et al.,<br>(2015)<br>6. Boone et al., (2014)<br>7. Boone et al., (2011)                                                                                                                                                                                                                                                                                                                                                                                                                                                                                                      | <b>1954</b><br><br><b>NC=</b><br><b>1570</b><br><br><b>CN=</b><br><b>384</b> | <b>0.19</b> | <b>[0.11, 0.27]</b> | <b>2.52E-06</b> | <b>7.00E-06</b> | <b>65.10</b> |
|           | PC | 6 | 1. Arcelus et al, (2015)<br>2. Boone et al, (2012)<br>3. Boone, vansteen et<br>al, (2014a)<br>4. Boone et al, (2011)<br>5. Boone, Soenens et<br>al, (2014b)<br>6. Gan et al., 2018                                                                                                                                                                                                                                                                                                                                                                                                                                                                                                                                                            | <b>2492</b><br><br><b>NC=</b><br><b>2492</b><br><br><b>CN=0</b>              | <b>0.37</b> | <b>[0.30, 0.45]</b> | <b>1.76E-10</b> | <b>1.10E-09</b> | <b>72.31</b> |

|            |    |    |                                                                                                                                                                                                                                                                                                                                                                                                          |                                                        |             |                      |                 |                 |              |
|------------|----|----|----------------------------------------------------------------------------------------------------------------------------------------------------------------------------------------------------------------------------------------------------------------------------------------------------------------------------------------------------------------------------------------------------------|--------------------------------------------------------|-------------|----------------------|-----------------|-----------------|--------------|
|            | UN | 10 | <ol style="list-style-type: none"> <li>Curzio et al, (2018a)</li> <li>Curzio et al, (2018b)</li> <li>Curzio et al, (2018c)</li> <li>Eddy et al, (2007)</li> <li>Sehm &amp; Warschburger (2018a)</li> <li>Sehm &amp; Warschburger (2018b)</li> <li>McCabe &amp; Vincent (2003)</li> <li>Warschburger &amp; Zitzmann, 2018</li> <li>Maiano et al., 2016 – Sample 1</li> <li>Fortes et al., 2014</li> </ol> | <b>3613</b><br><br><b>NC=3107</b><br><br><b>CN=506</b> | <b>0.24</b> | <b>[0.009, 0.30]</b> | <b>1.87E-03</b> | <b>3.34E-03</b> | <b>95.5</b>  |
| <b>RT</b>  | PS | 6  | <ol style="list-style-type: none"> <li>Curzio et al., (2018), Sample 1</li> <li>Curzio et al., (2018), Sample 2</li> <li>Curzio et al., (2018), Sample 3</li> <li>Boone et al., (2010)</li> <li>Boone et al., (2014)</li> <li>Serpell et al., (2006)</li> </ol>                                                                                                                                          | <b>1549</b><br><br><b>NC=1116</b><br><br><b>CN=433</b> | <b>0.19</b> | <b>[0.13, 0.25]</b>  | <b>1.36E-09</b> | <b>6.80E-09</b> | <b>19.70</b> |
|            | PC | 3  | <ol style="list-style-type: none"> <li>Boone et al., (2010)</li> <li>Boone et al., (2014)</li> <li>Serpell et al., (2006)</li> </ol>                                                                                                                                                                                                                                                                     | <b>1165</b><br><br><b>NC=1116</b><br><br><b>CN=49</b>  | <b>0.32</b> | <b>[0.24, 0.40]</b>  | <b>1.91E-15</b> | <b>1.59E-14</b> | <b>44.10</b> |
|            | UN | 7  | <ol style="list-style-type: none"> <li>Curzio et al, (2018a)</li> <li>Curzio et al, (2018b)</li> <li>Curzio et al, (2018c)</li> <li>Sehm &amp; Warschburger (2018)</li> <li>Sehm &amp; Warschburger (2018)</li> <li>Jones et al., (2020)</li> <li>Fortes et al., (2014)</li> </ol>                                                                                                                       | <b>2061</b><br><br><b>NC=1677</b><br><br><b>CN=384</b> | <b>0.27</b> | <b>[0.09, 0.45]</b>  | <b>3.39E-03</b> | <b>5.65E-03</b> | <b>95.6</b>  |
| <b>WSC</b> | PS | 7  | <ol style="list-style-type: none"> <li>Boone et al., (2014a)</li> <li>Boone et al., (2010)</li> <li>Boone et al., (2014b)</li> <li>Serpell et al., (2006)</li> <li>Stornaes et al., (2019)</li> <li>Wade et al., (2015)</li> <li>Swierczynska et al., (2020)</li> </ol>                                                                                                                                  | <b>3723</b><br><br><b>NC=3674</b><br><br><b>CN=49</b>  | <b>0.16</b> | <b>[0.10, 0.22]</b>  | <b>2.38E-07</b> | <b>7.50E-07</b> | <b>56.90</b> |

|           |    |   |                                                                                                                                                                                                        |                                                         |             |                        |                 |                 |              |
|-----------|----|---|--------------------------------------------------------------------------------------------------------------------------------------------------------------------------------------------------------|---------------------------------------------------------|-------------|------------------------|-----------------|-----------------|--------------|
|           | PC | 7 | 1. Boone et al., (2014a)<br>2. Boone et al., (2010)<br>3. Boone et al., (2014b)<br>4. Serpell et al., (2006)<br>5. Stornaes et al., (2019)<br>6. Wade et al., (2015)<br>7. Swierczynska et al., (2020) | <b>3723</b><br><br><b>NC=3674</b><br><br><b>CN=49</b>   | <b>0.33</b> | <b>[0.26, 0.41]</b>    | <b>4.65E-19</b> | <b>1.16E-17</b> | <b>83.40</b> |
|           | UN | 4 | 1. Eddy et al., (2007)<br>2. Sehm & Warschburger (2018), Sample 1<br>3. Sehm & Warschburger (2018), Sample 2<br>4. Jones et al., (2020)                                                                | <b>1431</b><br><br><b>NC=1309</b><br><br><b>CN= 392</b> | <b>0.17</b> | <b>[-0.05, 0.40]</b>   | <b>1.37E-01</b> | <b>1.56E-01</b> | <b>95.00</b> |
| <b>DT</b> | PS | 3 | 1. Boone et al., (2012)<br>2. Boone et al (2014)<br>3. Ruggiero et al., (2003)                                                                                                                         | <b>772</b><br><br><b>NC=772</b><br><br><b>CN=0</b>      | <b>0.11</b> | <b>[-0.0035, 0.22]</b> | <b>5.75E-02</b> | <b>7.29E-02</b> | <b>49.24</b> |
|           | PC | 3 | 1. Boone et al., (2012)<br>2. Ruggiero et al., (2003)<br>3. Boone et al., (2014)                                                                                                                       | <b>772</b><br><br><b>NC=675</b><br><br><b>CN=0</b>      | <b>0.31</b> | <b>[0.20, 0.42]</b>    | <b>3.12E-08</b> | <b>1.30E-07</b> | <b>53.49</b> |
|           | UN | 6 | 1. Custers & Van den Bulck (2009)<br>2. Faust (1987)<br>3. Warschburger & Zitzmann, 2018<br>4. Maiano et al., 2016, Sample 1<br>5. Simmons et al., 2002, Sample 1<br>6. Simmons et al., 2002, Sample 2 | <b>2874</b><br><br><b>NC=2874</b><br><br><b>CN=0</b>    | <b>0.22</b> | <b>[0.17, 0.27]</b>    | <b>5.29E-17</b> | <b>6.61E-16</b> | <b>45.70</b> |
| <b>BD</b> | PS | 6 | 1. Arcelus et al., (2015)<br>2. Boone et al., (2014)<br>3. Boone et al., (2011)<br>4. Ruggiero et al., (2003)<br>5. Boone et al., (2012)<br>6. Rosewall et al., (2018)                                 | <b>1746</b><br><br><b>NC=1746</b><br><br><b>CN=0</b>    | <b>0.11</b> | <b>[-0.02, 0.24]</b>   | <b>1.16E-01</b> | <b>1.38E-01</b> | <b>85.00</b> |

|            |    |    |                                                                                                                                                                                                                                                                                 |                                                            |             |                      |                 |                 |              |
|------------|----|----|---------------------------------------------------------------------------------------------------------------------------------------------------------------------------------------------------------------------------------------------------------------------------------|------------------------------------------------------------|-------------|----------------------|-----------------|-----------------|--------------|
|            | PC | 7  | 1. Arcelus et al., (2015)<br>2. Boone et al., (2012)<br>3. Ruggiero et al., (2003)<br>4. Boone et al., (2011)<br>5. Lyman & Luthar (2014)<br>6. Ferrand et al., (2007)<br>7. Rosewall et al., (2018)                                                                            | <b>1687</b><br><b>NC=</b><br><b>1687</b><br><b>CN=0</b>    | <b>0.30</b> | <b>[0.17, 0.42]</b>  | <b>4.32E-06</b> | <b>9.82E-06</b> | <b>88.00</b> |
|            | UN | 3  | 1. Warschburger & Zitzmann (2018)<br>2. Maiano et al., (2016).1<br>3. Mockdece Neves et al., (2016)                                                                                                                                                                             | <b>1531</b><br><b>NC=</b><br><b>1531</b><br><b>CN=0</b>    | <b>0.06</b> | <b>[-0.11,0.24]</b>  | <b>4.63E-01</b> | <b>4.82E-01</b> | <b>86.8</b>  |
| <b>EAC</b> | PS | 4  | 1. Boone et al., (2010)<br>2. Boone et al., (2014)<br>3. Serpell et al., (2006)<br>4. Swierczynska, 2020                                                                                                                                                                        | <b>1510</b><br><b>NC=</b><br><b>1461</b><br><b>CN=49</b>   | <b>0.18</b> | <b>[0.09, 0.27]</b>  | <b>1.64E-04</b> | <b>3.42E-04</b> | <b>65.90</b> |
|            | PC | 4  | 1. Serpell et al, (2006)<br>2. Boone et al, (2014)<br>3. Boone et al, (2010)<br>4. Swierczynska, 2020                                                                                                                                                                           | <b>1510</b><br><b>NC=</b><br><b>1461</b><br><b>CN=49</b>   | <b>0.25</b> | <b>[-0.04, 0.46]</b> | <b>2.21E-02</b> | <b>3.25E-02</b> | <b>94.80</b> |
|            | UN | NA | NA                                                                                                                                                                                                                                                                              | NA                                                         | NA          | NA                   | NA              | NA              | NA           |
| <b>ITI</b> | UN | 9  | 1. Chen et al., (2010) Sample 1<br>2. Chen et al., (2010) Sample 2<br>3. Eddy et al, (2007)<br>4. Sehm & Warschburger (2018), Sample 1<br>5. Sehm & Warschburger (2018), Sample 2<br>6. Francisco & al. (2015)<br>7. Francisco & al. (2015)<br>8. Warschburger & Zitzmann, 2018 | <b>3739</b><br><b>NC=</b><br><b>3617</b><br><b>CN= 122</b> | <b>0.13</b> | <b>[-0.00,0.26]</b>  | <b>5.04E-02</b> | <b>7.00E-02</b> | <b>94.4</b>  |

|           |    |    |                                                                                                                                                             |                                                      |             |                         |                 |                 |             |
|-----------|----|----|-------------------------------------------------------------------------------------------------------------------------------------------------------------|------------------------------------------------------|-------------|-------------------------|-----------------|-----------------|-------------|
|           |    |    | 9. Mockdece Neves et al., 2016                                                                                                                              |                                                      |             |                         |                 |                 |             |
|           | PS | NA | NA                                                                                                                                                          | NA                                                   | NA          | NA                      | NA              | NA              | NA          |
|           | PC | NA | NA                                                                                                                                                          | NA                                                   | NA          | NA                      | NA              | NA              | NA          |
| <b>IA</b> | UN | 5  | 1. Faust (1987)<br>2. Sehm & Warschburger (2018a)<br>3. Sehm & Warschburger (2018b)<br>4. Maiano et al., 2016, Sample 1<br>5. Maiano et al., 2016, Sample 2 | <b>2298</b><br><br><b>NC=2298</b><br><br><b>CN=0</b> | <b>0.25</b> | <b>[0.3018, 0.4336]</b> | <b>3.19E-04</b> | <b>6.13E-04</b> | <b>91.0</b> |
|           | PS | NA | NA                                                                                                                                                          | NA                                                   | NA          | NA                      | NA              | NA              | NA          |
|           | PC | NA | NA                                                                                                                                                          | NA                                                   | NA          | NA                      | NA              | NA              | NA          |

Note. Total: ED symptoms total scores on scales; PS: Perfectionistic Striving; PC: Perfectionistic Concern; UN: Unidimensional Perfectionism; NC=Community; CN=Clinical; BE: Binge eating; RT: Restraint; WSC: Weight/shape Concerns; DT = Drive for Thinness; BD = Body Dissatisfaction; EAC: Eating Concern; ITI: Internalization of the Thin Ideal (composite of IBSS-R and SATAQ); IA: Interoceptive Awareness; LL: Lower Limit; UL: Upper Limit;  $I^2$ : total heterogeneity/total variability; Significant results after correction are in **bold**.

**Supplementary Figure S1. Forest plot of the magnitude of the association between unidimensional perfectionism and eating related symptoms.**

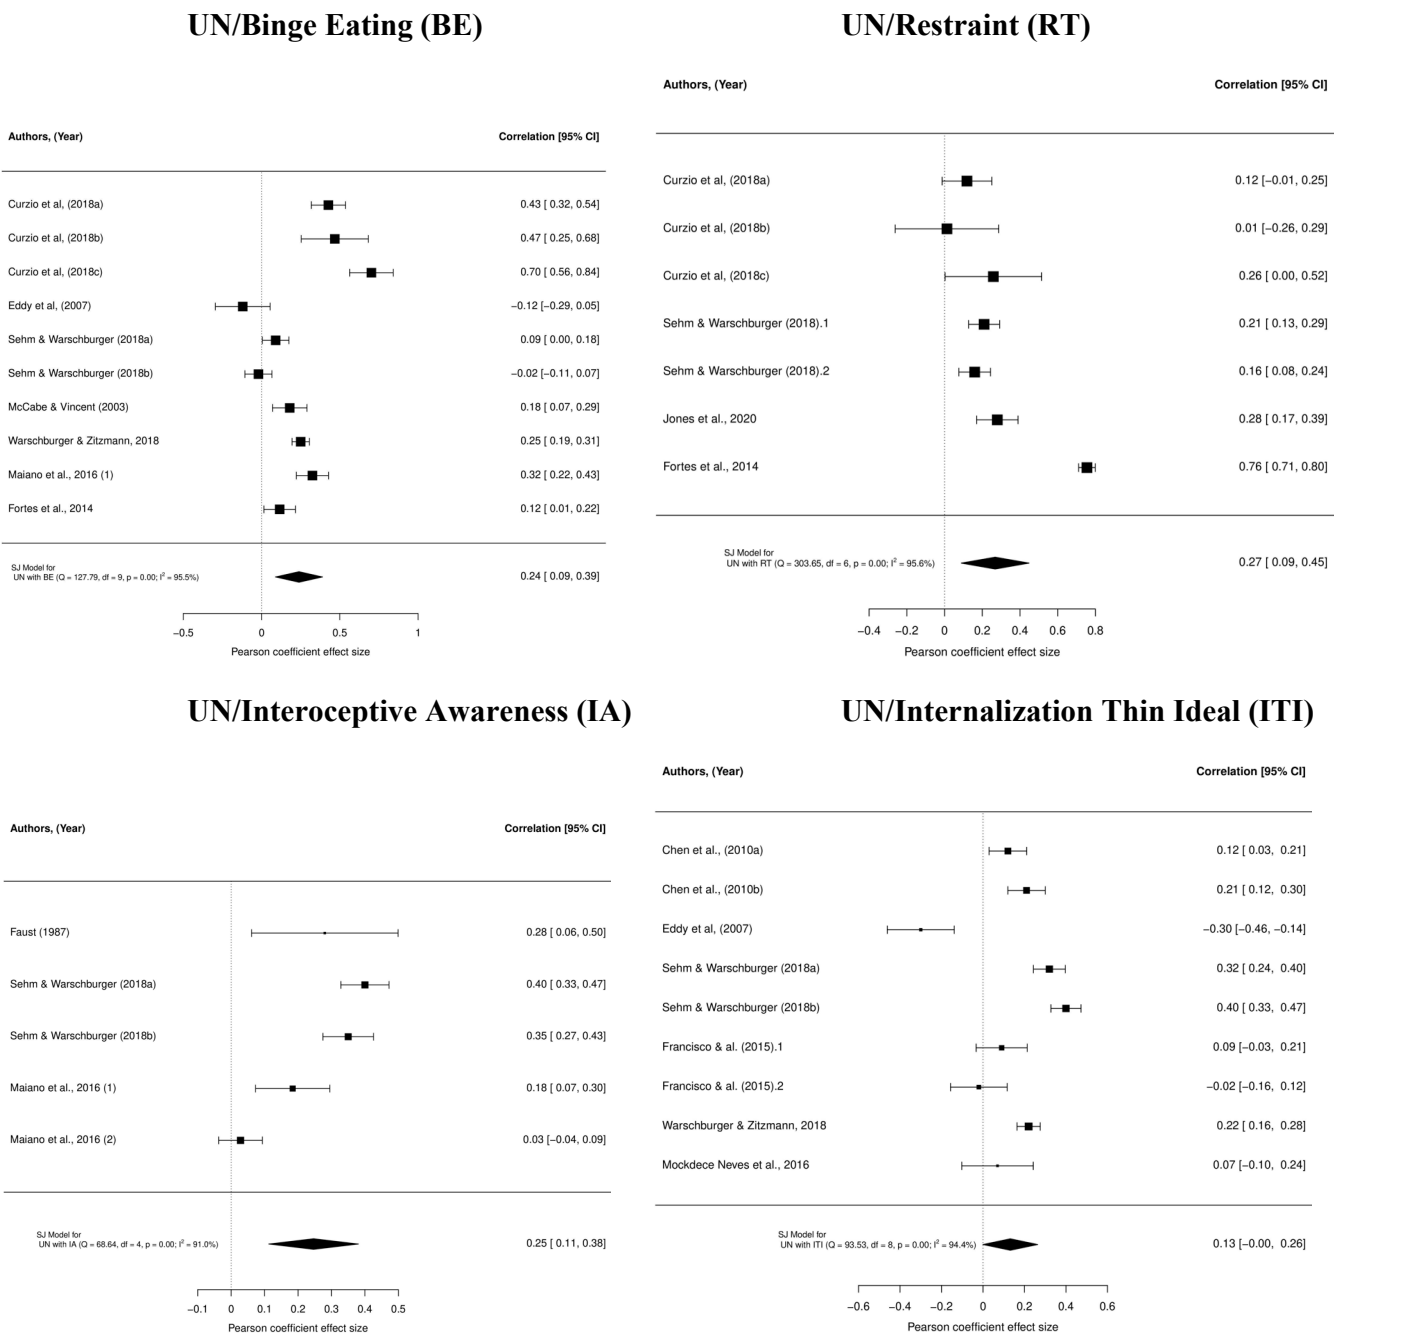

## UN/Drive for Thinness (DT)

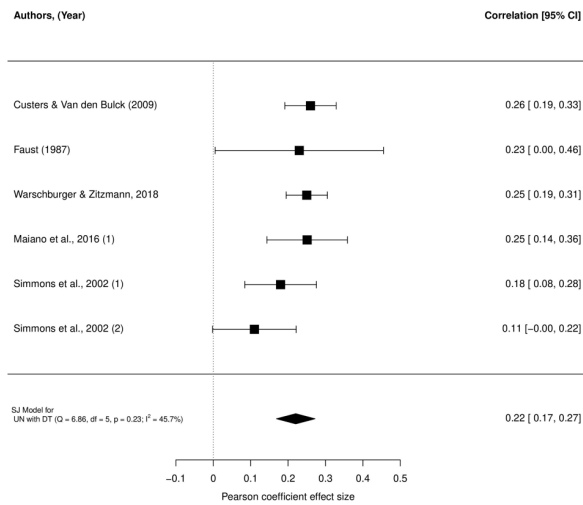

## UN/Weight and Shape Concerns (WSC)

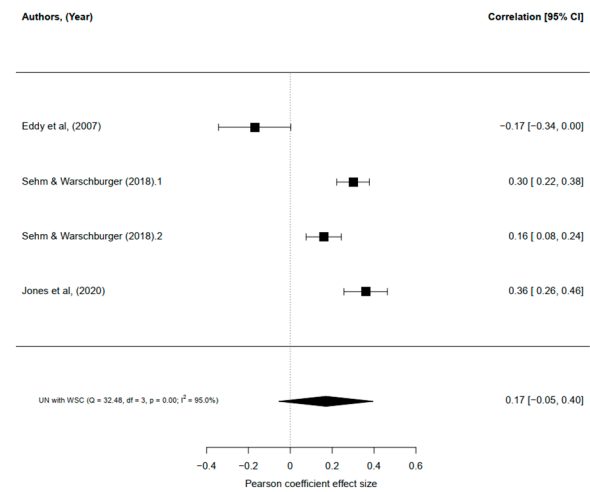

## UN/Body Dissatisfaction (BD)

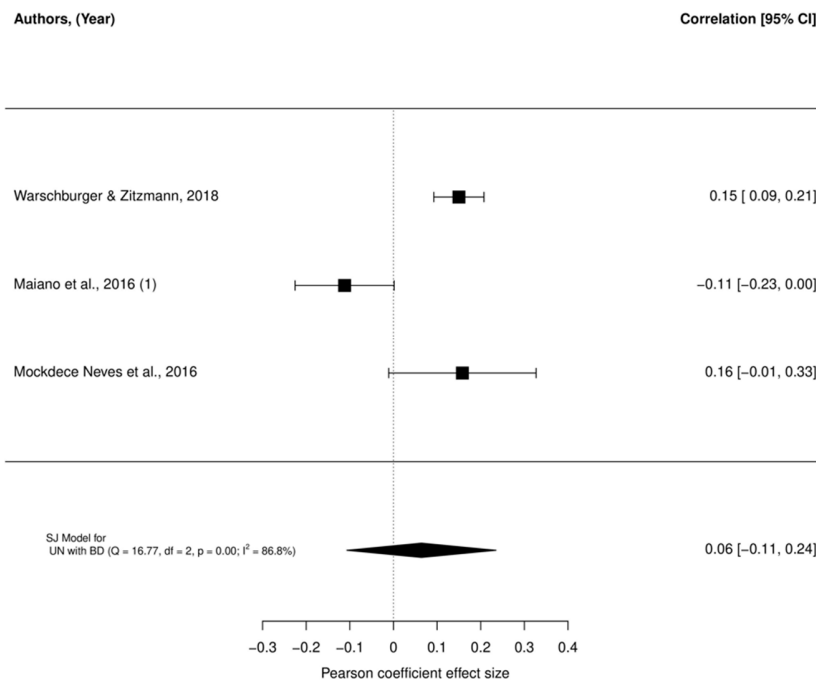

Note. UN: Unidimensional Perfectionism. Random-effect meta-analytic effect sizes of unidimensional perfectionism; Included samples are presented on the left of the forest plots, with 95% confidence intervals around the Pearson's correlation effect sizes on the right. Squares represent original studies' correlation effect size surrounded by the 95% confidence intervals. Diamonds represent the random-effect meta-analytic effect sizes.  $I^2$  statistics quantify the heterogeneity in the random-effect meta-analyses.

**Supplementary Figure S2. Forest plot of the magnitude of the association between perfectionistic strivings and eating related symptoms.**

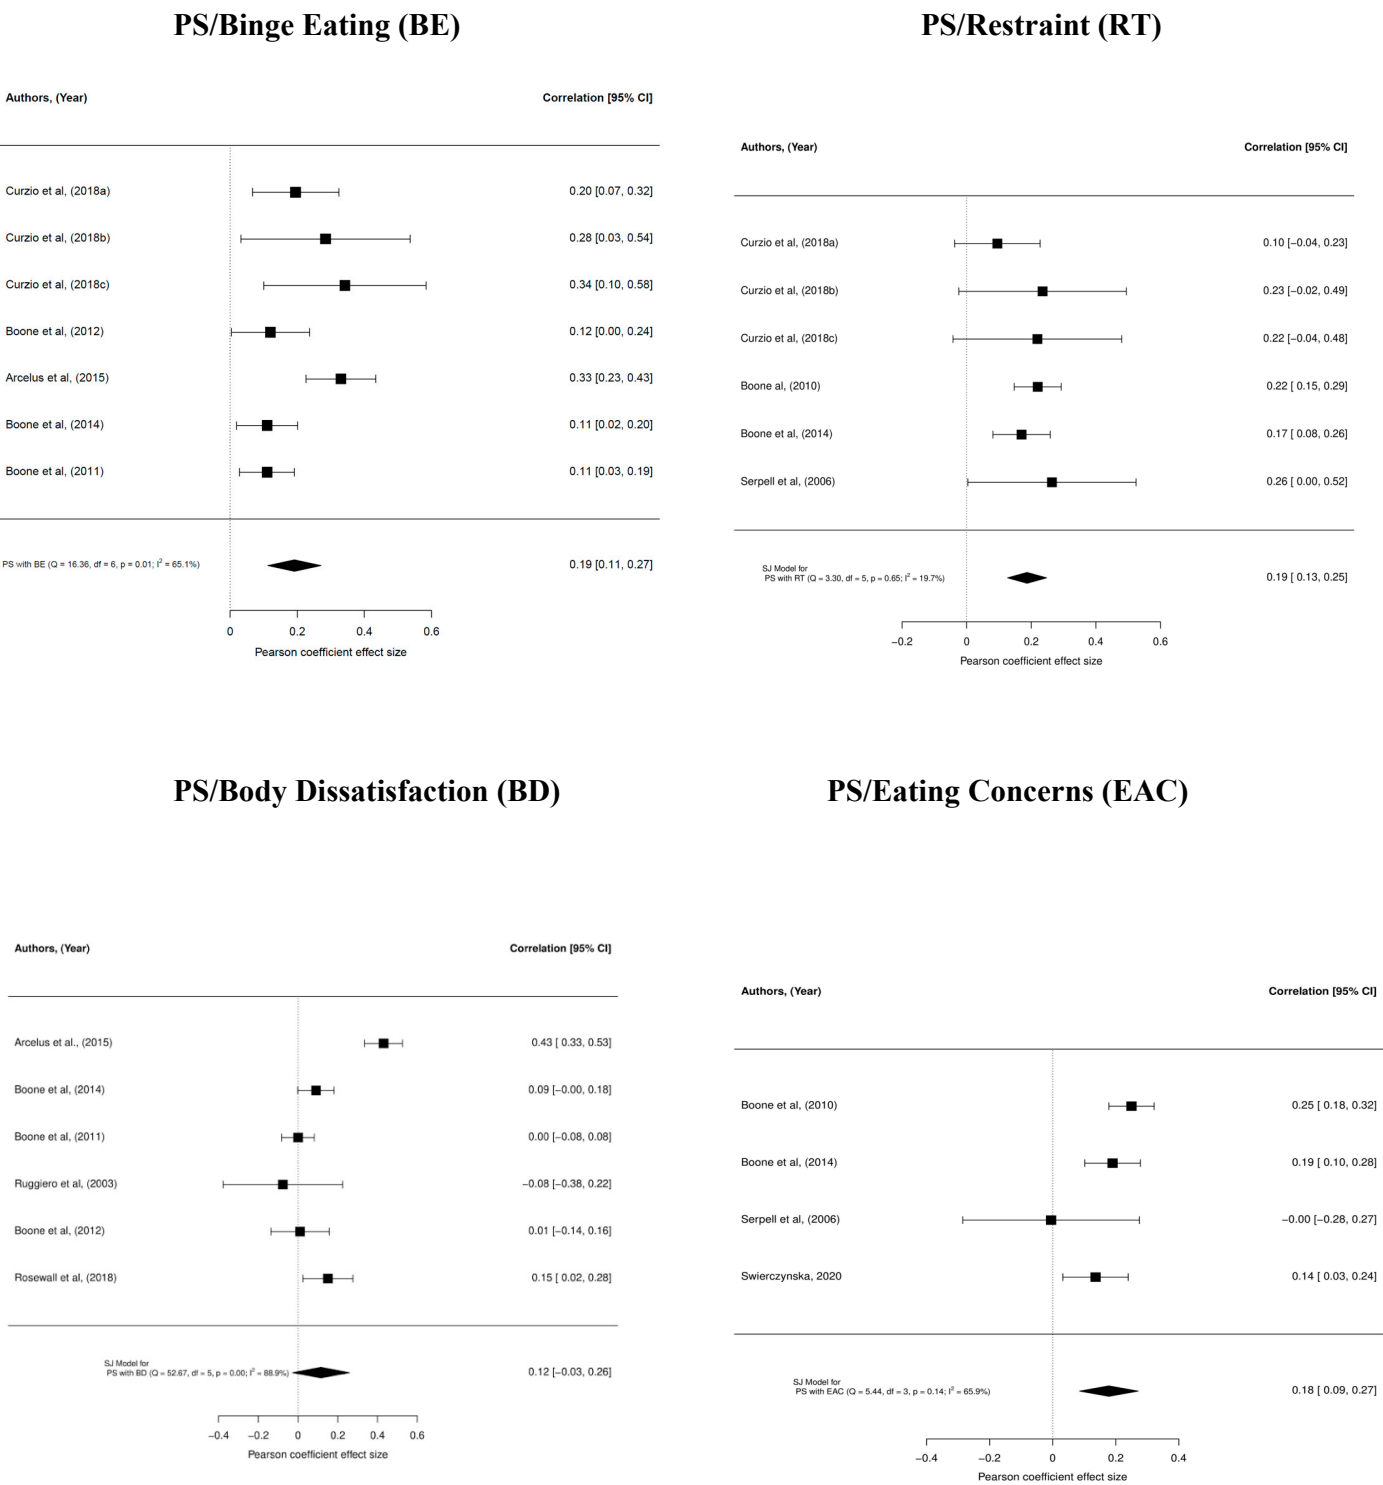

## PS/Drive for Thinness (DT)

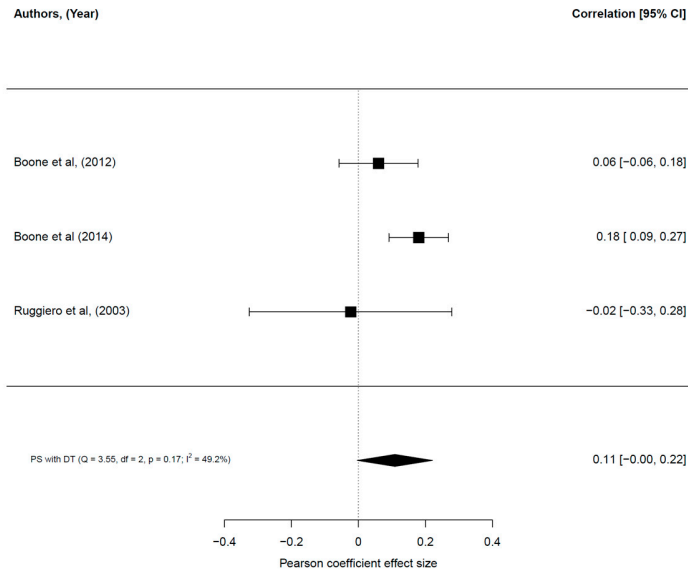

## PS/Weight and Shape Concerns (WSC)

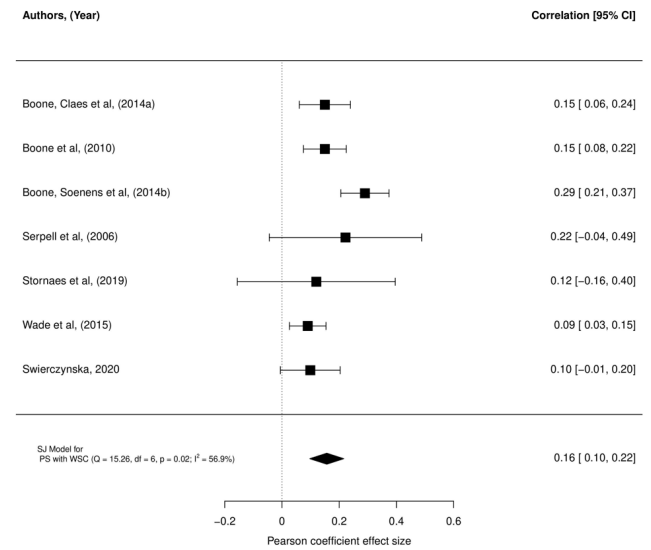

Note. PS: Perfectionistic Striving. Random-effect meta-analytic effect sizes of perfectionistic strivings; Included samples are presented on the left of the forest plots, with 95% confidence intervals around the Pearson's correlation effect sizes on the right. Squares represent original studies' correlation effect size surrounded by the 95% confidence intervals. Diamonds represent the random-effect meta-analytic effect sizes.  $I^2$  statistics quantify the heterogeneity in the random-effect meta-analyses.

**Supplementary Figure S3. Forest plot of the magnitude of the association between perfectionistic concerns and eating related symptoms.**

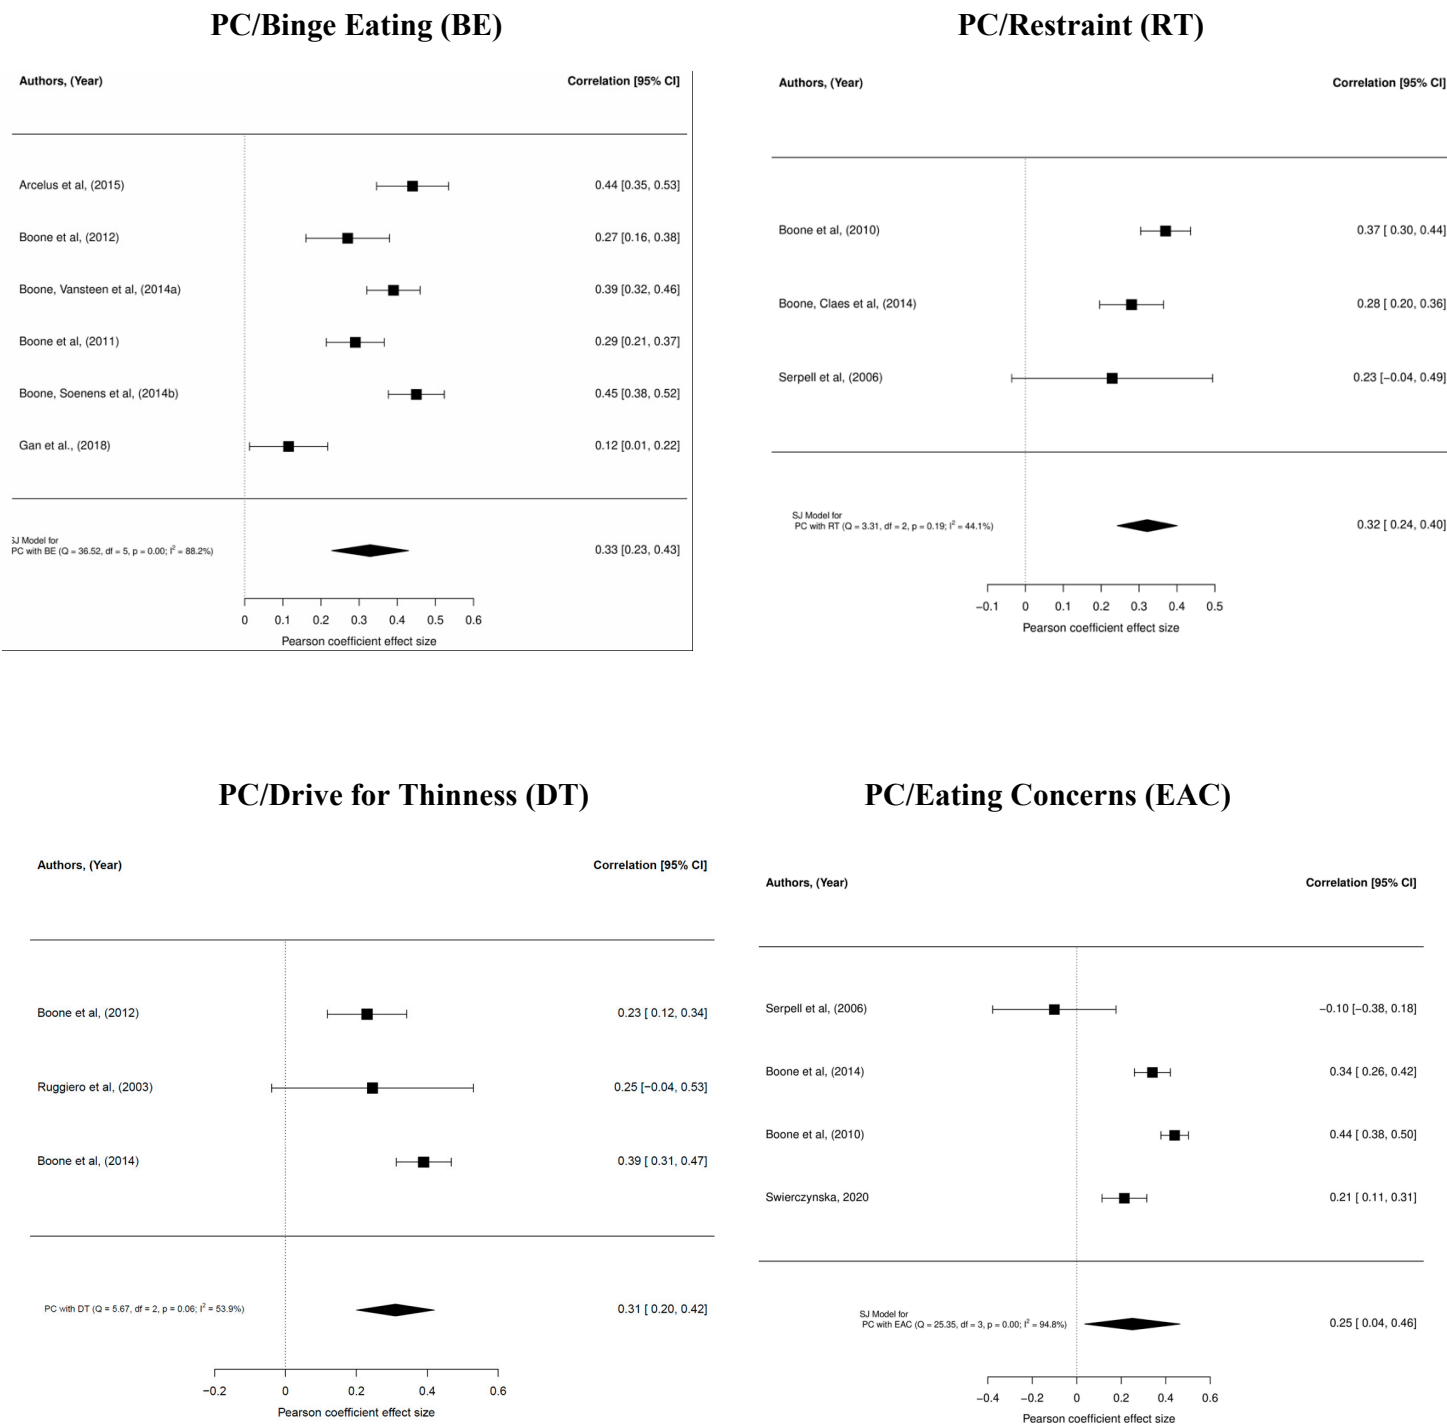

## PC/Body Dissatisfaction (BD)

## PC/Weight and Shape Concerns (WSC)

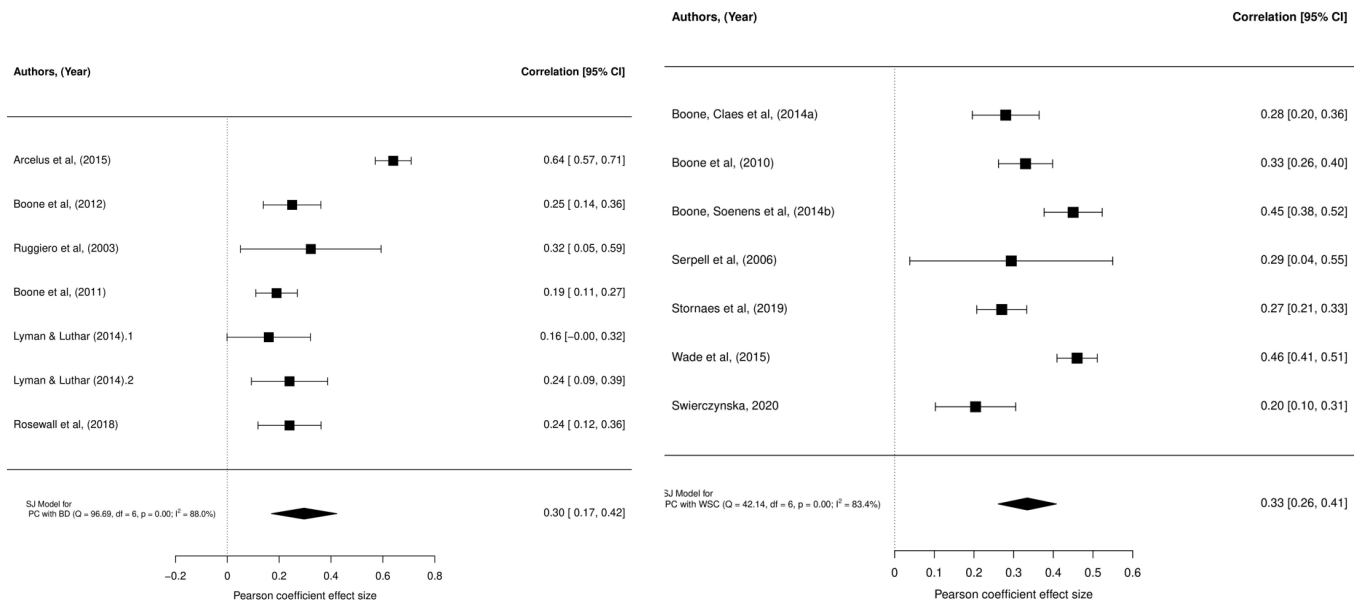

Note. PC: Perfectionistic Concerns. Random-effect meta-analytic effect sizes of perfectionistic concerns; Included samples are presented on the left of the forest plots, with 95% confidence intervals around the Pearson's correlation effect sizes on the right. Squares represent original studies' correlation effect size surrounded by the 95% confidence intervals. Diamonds represent the random-effect meta-analytic effect sizes.  $I^2$  statistics quantify the heterogeneity in the random-effect meta-analyses.

**Supplementary Figure S4. Funnel plots for the association between eating related symptoms, unidimensional perfectionism, perfectionistic strivings and concerns.**

Unidimensional

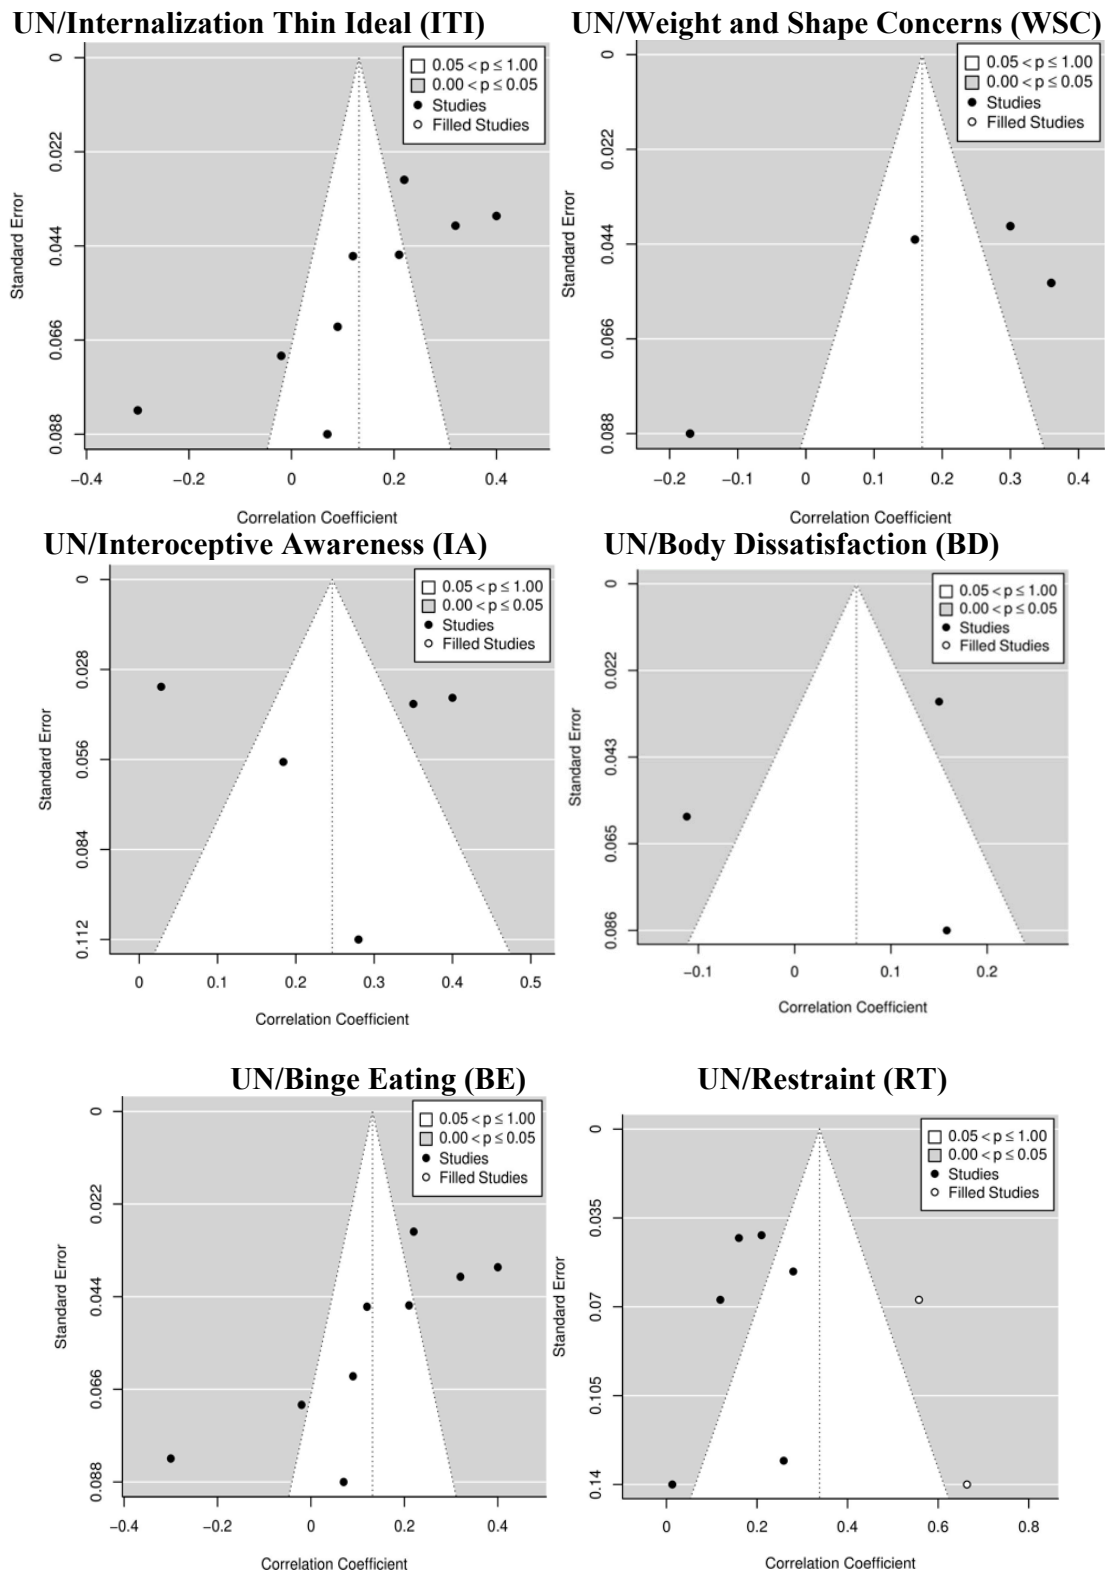

## Perfectionistic Strivings

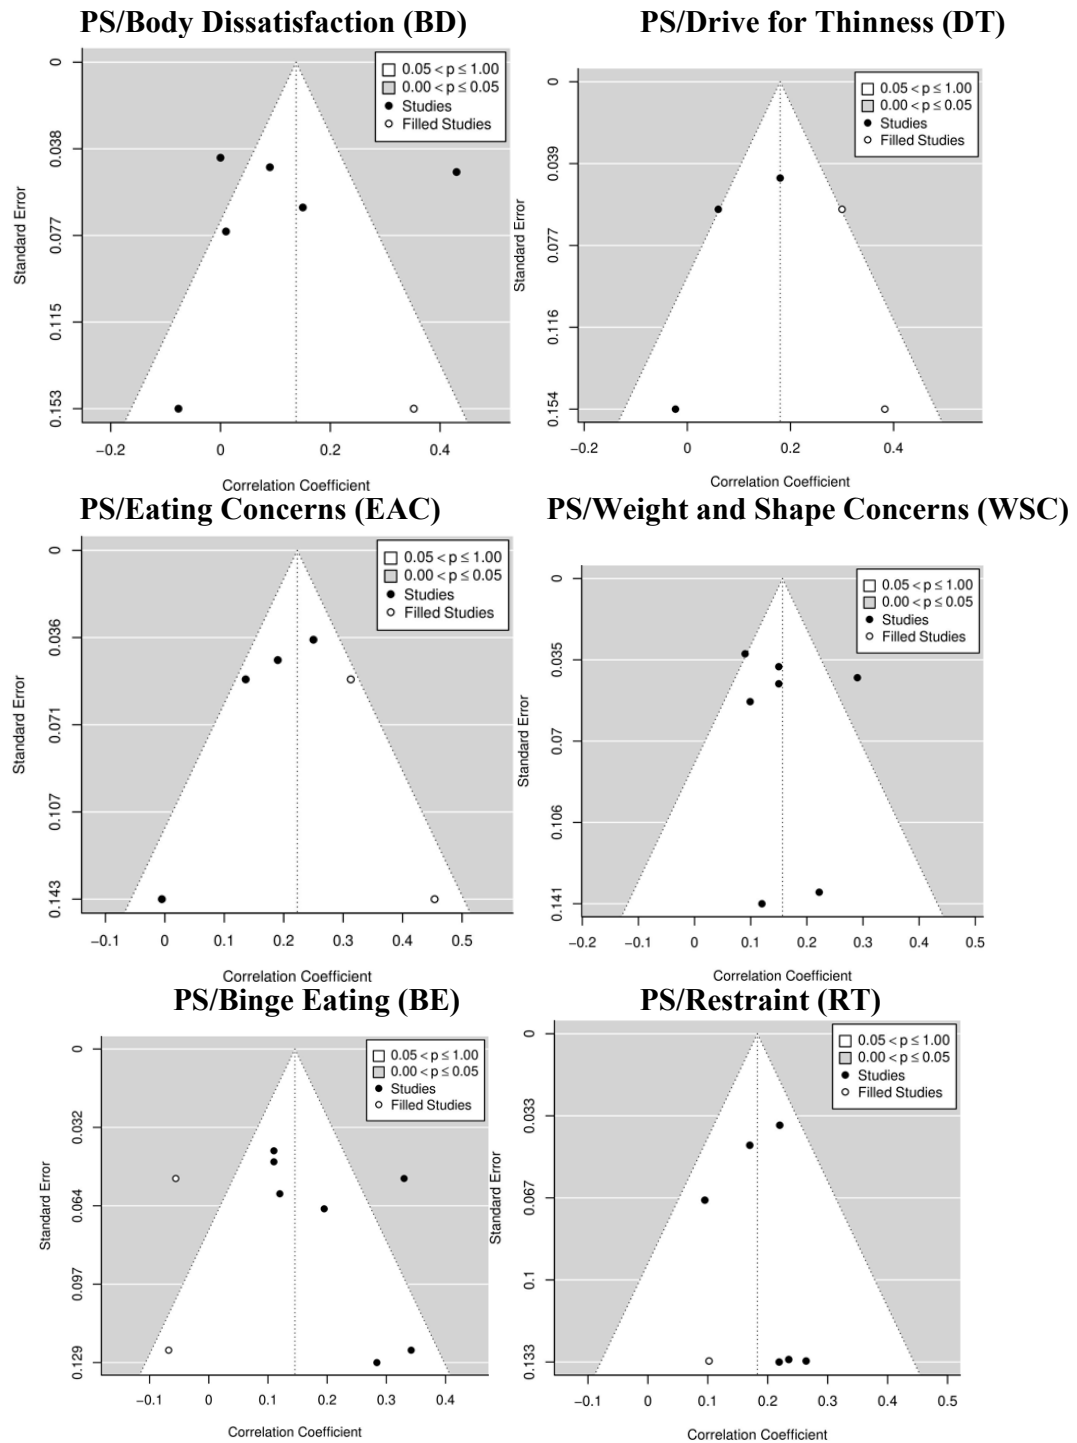

## Perfectionistic Concerns

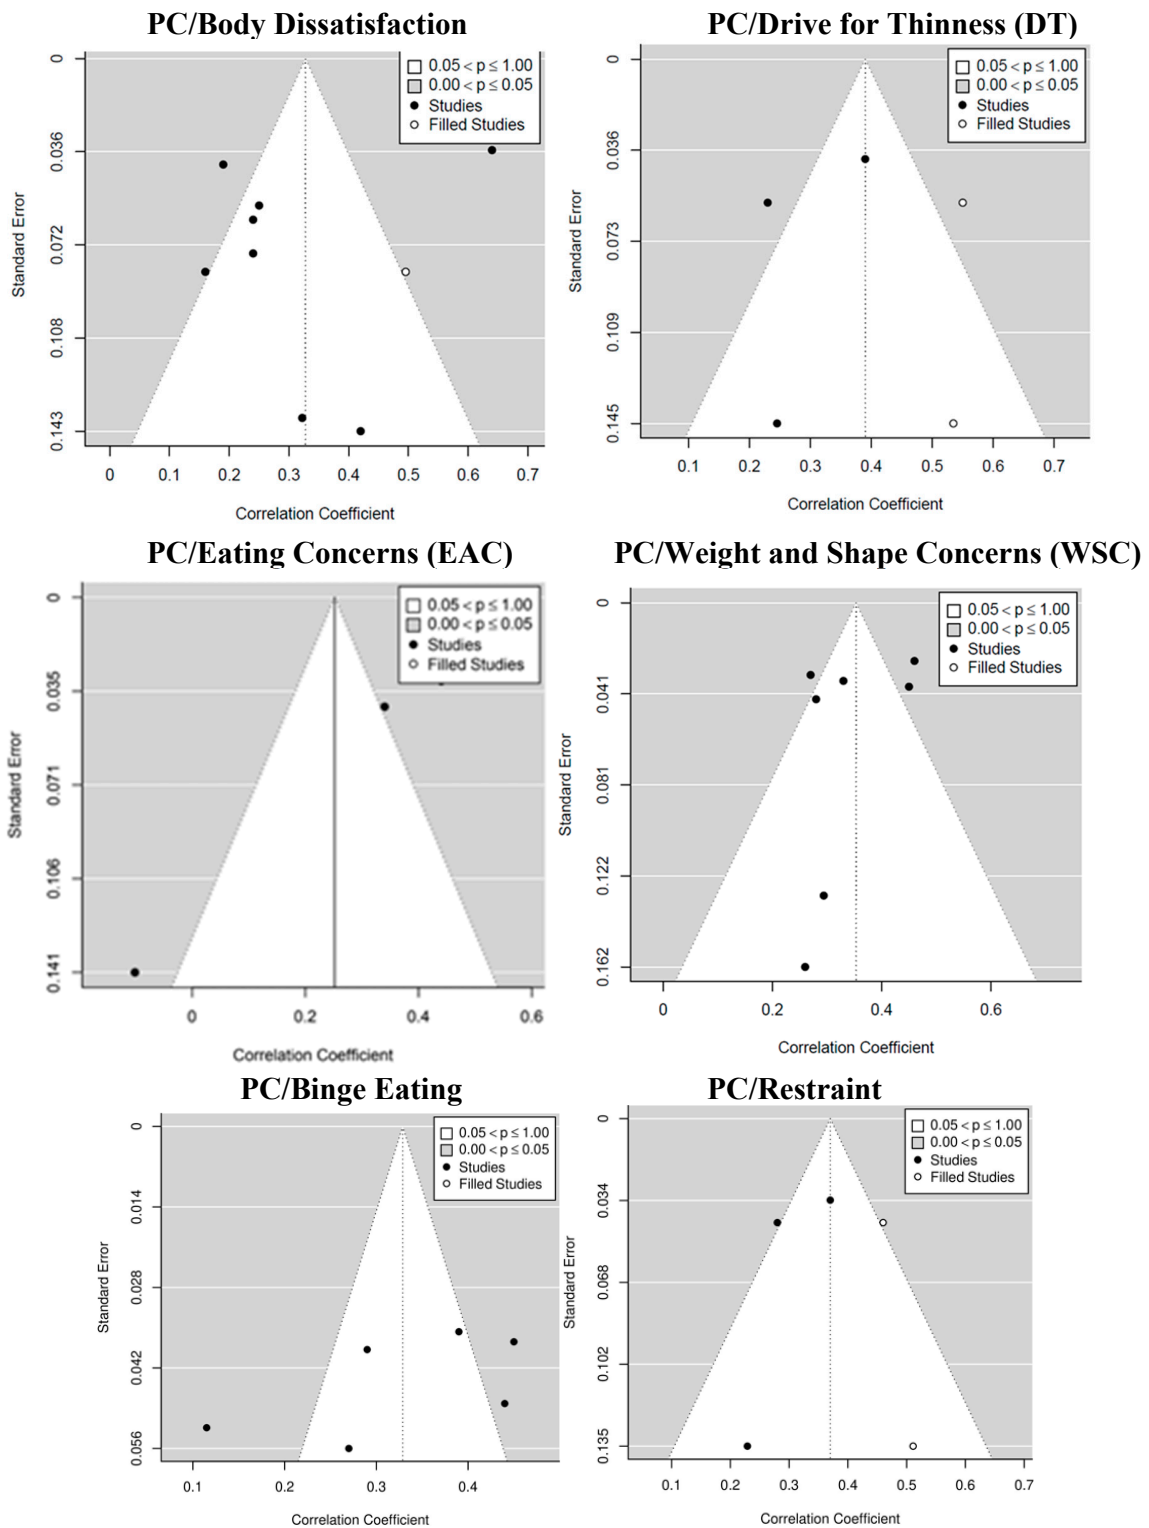

Note. PS: Perfectionistic Striving; PC: Perfectionistic Concern; UN: Unidimensional Perfectionism. Funnel Plot with Trim and Fill for Cognitive eating related symptoms. Include studies are represented as black circles whereas filled studies are represented as white circles in the plot in order to estimate the number of missing studies with extreme results. However, the number of included studies is relatively small, therefore the publication bias was evaluated quantitatively with Egger's and Begg's tests.

**Supplementary Table S7. Summary of meta-analyses using random-effects models on the relationship between eating related symptoms total scores and perfectionism (subdivided by their clinical status and their mean age).**

| EDs          | Perfectionism | Group     | Number of studies (k) | Authors (Year)                                                                                                                                                                                                                                                                                                                                                                                                                                                                                                                                                                                                                                                                                                                                                                                                                                                                             | Sample (N) | Mean effect size r | 95% Confidence Interval [LL, UL] | p-value (pFDR)          | I <sup>2</sup> (%) |
|--------------|---------------|-----------|-----------------------|--------------------------------------------------------------------------------------------------------------------------------------------------------------------------------------------------------------------------------------------------------------------------------------------------------------------------------------------------------------------------------------------------------------------------------------------------------------------------------------------------------------------------------------------------------------------------------------------------------------------------------------------------------------------------------------------------------------------------------------------------------------------------------------------------------------------------------------------------------------------------------------------|------------|--------------------|----------------------------------|-------------------------|--------------------|
| Global score | UN            | Community | 20                    | <ol style="list-style-type: none"> <li>1. Tiggeman &amp; Dyer (1995)</li> <li>2. Fryer, Waller &amp; Kroese (1997)</li> <li>3. Francisco &amp; al. (2015).1</li> <li>4. Francisco &amp; al. (2015).2</li> <li>5. Gutiérrez &amp; al., 2015</li> <li>6. Flett &amp; al., (2016) (Study 3) sample 4 .1</li> <li>7. Flett &amp; al., (2016) (Study 3) sample 4 .2</li> <li>8. Shaw et al, (2003)</li> <li>9. Plumed et al., (2017).1</li> <li>10. Plumed et al., (2017).2</li> <li>11. Gonzalez et al., (2018).1</li> <li>12. Gonzalez et al., (2018).2</li> <li>13. Gonzalez et al., (2018).3</li> <li>14. Gonzalez et al., (2018).4</li> <li>15. Warschburger &amp; Zitzmann, (2018)</li> <li>16. Maiano et al., 2016 (2)</li> <li>17. Maiano et al., 2016 (4)</li> <li>18. Mockdece Neves et al., (2016)</li> <li>19. Fortes et al., (2014)</li> <li>20. Turgeon et al., (2011)</li> </ol> | 12223      | 0,16               | [0.10, 0.22]                     | 1.890E-07<br>(5.25E-07) | 89,1               |

|  |  |                         |    |                                                                                                                                                                                                                                                                                                                                                                                                                                                    |      |      |               |                          |       |
|--|--|-------------------------|----|----------------------------------------------------------------------------------------------------------------------------------------------------------------------------------------------------------------------------------------------------------------------------------------------------------------------------------------------------------------------------------------------------------------------------------------------------|------|------|---------------|--------------------------|-------|
|  |  | Clinical                | 3  | 1. Drieberg et al, (2019)<br>2. Wiederman & Pryor (1998)<br>3. Cresswell et al., (2022)                                                                                                                                                                                                                                                                                                                                                            | 490  | 0,25 | [0.09, 0.42]  | 2.410E-03<br>(5.728E-03) | 73.2  |
|  |  | Mean age < 14 years old | 14 | 1. Elizathe et al, (2018)<br>2. Francisco & al. (2015).1<br>3. Francisco & al. (2015).2<br>4. Gutiérrez & al., 2015<br>5. Shaw et al, (2003)<br>6. Gonzalez et al., (2018).1<br>7. Gonzalez et al., (2018).2<br>8. Gonzalez et al., (2018).3<br>9. Gonzalez et al., (2018).4<br>10. Warschburger & Zitzmann, (2018)<br>11. Maiano et al., 2016 (2)<br>12. Mockdece Neves et al., (2016)<br>13. Fortes et al., (2014)<br>14. Turgeon et al., (2011) | 5860 | 0.08 | [-0.03, 0.19] | 1.59E-01<br>(1.96E-01)   | 95,70 |
|  |  | Mean age > 14 years old | 15 | 1. Dakanalis et al, (2018)<br>2. Drieberg et al, (2019)<br>3. Rosenvinge et al, (1999)<br>4. Santonastaso et al, (1999)<br>5. Tiggeman & Dyer (1995)<br>6. Wiederman & Pryor (1998)<br>7. Fryer, Waller & Kroese (1997)<br>8. Flett & al., (2016) (Study 3) sample 4.1<br>9. Flett & al., (2016) (Study 3) sample 4.2<br>10. Bühren & al., (2012)                                                                                                  | 2535 | 0,29 | [0.18,0.41]   | 6.95E-07<br>(2.92E-06)   | 91,50 |

|  |    |           |    |                                                                                                                                                                                                                                                                                                                                                                                                                                                                                        |             |             |                     |                                  |              |
|--|----|-----------|----|----------------------------------------------------------------------------------------------------------------------------------------------------------------------------------------------------------------------------------------------------------------------------------------------------------------------------------------------------------------------------------------------------------------------------------------------------------------------------------------|-------------|-------------|---------------------|----------------------------------|--------------|
|  |    |           |    | 11. Cresswell et al., (2022)<br>12. Sepulveda et al., (2021)<br>13. Maiano et al., 2016 (4)<br>14. Maiano et al., 2016 (5)<br>15. Castro-Fornieles et al., (2007)                                                                                                                                                                                                                                                                                                                      |             |             |                     |                                  |              |
|  | PS | Community | 14 | 1. Magson et al, (2019)<br>2. Wade et al. (2015) Baseline<br>3. McVey et al, (2002)<br>4. Nordin-Bates et al, (2011).1<br>5. Nordin-Bates et al, (2011).2<br>6. Teixeira et al, (2017)<br>7. Iannaccone et al, (2016)<br>8. Flett & al., (2016) (Study 3) sample 4 .1<br>9. Flett & al., (2016) (Study 3) sample 4 .2<br>10. Rosewall et al, (2018)<br>11. Petisco-Rodríguez et al., (2020)<br>12. Swierczynska, (2020)<br>13. Turgeon et al., (2015)<br>14. Gustafsson et al., (2008) | <b>3248</b> | <b>0,17</b> | <b>[0.08, 0.26]</b> | <b>1.870E-04<br/>(3.60E-04)</b>  | <b>87,9</b>  |
|  |    | Clinical  | 4  | 1. Castro et al, (2004)<br>2. Flamarique et al, (2019)<br>3. Serpell et al, (2006)<br>4. Iannaccone et al, (2016)                                                                                                                                                                                                                                                                                                                                                                      | <b>386</b>  | <b>0,26</b> | <b>[0.01, 0.51]</b> | <b>4.060E-02<br/>(4.640E-02)</b> | <b>83,70</b> |

|  |    |                         |    |                                                                                                                                                                                                                                                                                                                                                                                                                                                                                                         |      |      |              |                     |       |
|--|----|-------------------------|----|---------------------------------------------------------------------------------------------------------------------------------------------------------------------------------------------------------------------------------------------------------------------------------------------------------------------------------------------------------------------------------------------------------------------------------------------------------------------------------------------------------|------|------|--------------|---------------------|-------|
|  |    | Mean age < 14 years old | 5  | 5. Kirsh et al, (2007)<br>6. Magson et al, (2019)<br>7. Wade et al, (2015) Baseline<br>8. McVey et al, (2002)<br>9. Turgeon et al., (2015)                                                                                                                                                                                                                                                                                                                                                              | 2231 | 0,24 | [0.13, 0.34] | 1.33E-05 (3.55E-05) | 83,90 |
|  |    | Mean age > 14 years old | 14 | 1. Castro et al, (2004)<br>2. Serpell et al, (2006)<br>3. Nordin-Bates et al, (2011).1<br>4. Nordin-Bates et al, (2011).2<br>5. Teixeira et al, (2017)<br>6. Iannaccone et al, (2016). 1<br>7. Iannaccone et al, (2016).2<br>8. Flett & al., (2016) (Study 3) sample 4 .1<br>9. Flett & al., (2016) (Study 3) sample 4 .2<br>10. Rosewall et al, (2018)<br>11. Petisco-Rodríguez et al., (2020)<br>12. Sepulveda et al., (2021)<br>13. Gustafsson et al., (2008)<br>14. Castro-Fornieles et al., (2007) | 2306 | 0,17 | [0.07, 0.28] | 1.12E-03 (2.14E-03) | 84,9  |
|  | PC | Community               | 14 | 1. Campbell et al, (2018a)<br>2. Magson et al, (2019)<br>3. McVey, Pepler, Davis, Flett & Abdodell (2002)<br>4. Nordin-Bates, Walker & Redding (2011).1<br>5. Nordin-Bates, Walker & Redding (2011).2<br>6. Dour & Theran (2011)                                                                                                                                                                                                                                                                        | 3242 | 0,13 | [0.00, 0.27] | 4.840E-0 (6.37E-02) | 94,10 |

|  |                         |    |                                                                                                                                                                                                                                                                             |                                                                                                                                                                                                                                                                                                   |      |               |                          |       |  |
|--|-------------------------|----|-----------------------------------------------------------------------------------------------------------------------------------------------------------------------------------------------------------------------------------------------------------------------------|---------------------------------------------------------------------------------------------------------------------------------------------------------------------------------------------------------------------------------------------------------------------------------------------------|------|---------------|--------------------------|-------|--|
|  |                         |    |                                                                                                                                                                                                                                                                             | 7. Teixeira et al., (2018)<br>8. Iannaccone et al, (2016)<br>9. Flett & al., (2016) (Study 3) sample 4 .1<br>10. Flett & al., (2016) (Study 3) sample 4 .2<br>11. Rosewall et al, (2018)<br>12. Petisco-Rodríguez et al., (2020)<br>13. Swierczynska, (2020)<br>14. Pumariega & LaBarbera, (1986) |      |               |                          |       |  |
|  | Clinical                | 4  | 1. Castro et al, (2004)<br>2. Flamarique et al, (2019)<br>3. Serpell et al, (2006)<br>Iannaccone et al, (2016)                                                                                                                                                              | 231                                                                                                                                                                                                                                                                                               | 0,17 | [0.07, 0.27]  | 9.840E-04<br>(3.936E-03) | 8.9   |  |
|  | Mean age < 14 years old | 4  | 1. Kirsh et al, (2007)<br>2. Magson et al, (2019)<br>3. McVey, Pepler, Davis, Flett & Abdodell (2002)<br>Dour & Theran (2011)                                                                                                                                               | 1036                                                                                                                                                                                                                                                                                              | 0.14 | [-0.02, 0.29] | 8.09E-02<br>(1.14E-01)   | 82.00 |  |
|  | Mean age > 14 years old | 14 | 1. Campbell et al, (2018a)<br>2. Castro et al, (2004)<br>3. Serpell et al, (2006)<br>4. Nordin-Bates, Walker & Redding (2011).1<br>5. Nordin-Bates, Walker & Redding (2011).2<br>6. Teixeira et al., (2018)<br>Iannaccone et al, (2016). 1<br>7. Iannaccone et al, (2016).2 | 2618                                                                                                                                                                                                                                                                                              | 0.10 | [-0.02, 0.22] | 1.15E-01<br>(1.41E-01)   | 88.9  |  |

|           |    |                         |   |                                                                                                                                                                                                                                                                            |             |             |                     |                            |              |
|-----------|----|-------------------------|---|----------------------------------------------------------------------------------------------------------------------------------------------------------------------------------------------------------------------------------------------------------------------------|-------------|-------------|---------------------|----------------------------|--------------|
|           |    |                         |   | 8. Flett & al., (2016) (Study 3) sample 4 .1<br>9. Flett & al., (2016) (Study 3) sample 4 .2<br>10. Rosewall et al, (2018)<br>11. Petisco-Rodríguez et al., (2020)<br>12. Sepulveda et al., (2021)<br>13. Castro-Fornieles et al., (2007)<br>Pumariega & LaBarbera, (1986) |             |             |                     |                            |              |
| <b>BE</b> | UN | Community               | 6 | 1. Sehm & Warschburger (2018a)<br>2. Sehm & Warschburger (2018b)<br>3. McCabe & Vincent (2003)<br>4. Warschburger & Zitzmann, 2018<br>5. Maiano et al., 2016<br>6. Fortes et al., 2014                                                                                     | <b>3107</b> | <b>0,16</b> | <b>[0.06, 0.25]</b> | <b>0,00</b>                | <b>87,10</b> |
|           |    | Clinical                | 4 | 1. Curzio et al, (2018a)<br>2. Curzio et al, (2018b)<br>3. Curzio et al, (2018c)<br>4. Eddy et al, (2007)                                                                                                                                                                  | <b>506</b>  | <b>0,37</b> | <b>[0.03, 0.71]</b> | <b>0,0316</b>              | <b>94,95</b> |
|           |    | Mean age < 14 years old | 5 | 1. Curzio et al, (2018c)<br>2. Eddy et al, (2007)<br>3. McCabe & Vincent (2003)<br>4. Warschburger & Zitzmann, 2018<br>5. Fortes et al., 2014                                                                                                                              | <b>2017</b> | <b>0,23</b> | <b>[0.03-0.49]</b>  | <b>8.57E-02 (1.14E-01)</b> | <b>96.80</b> |

|    |           |                         |   |                                                                                                                                                                                |             |               |                         |                              |              |
|----|-----------|-------------------------|---|--------------------------------------------------------------------------------------------------------------------------------------------------------------------------------|-------------|---------------|-------------------------|------------------------------|--------------|
|    |           | Mean age > 14 years old | 5 | 1. Curzio et al, (2018a)<br>2. Curzio et al, (2018b)<br>3. Sehm & Warschburger (2018a)<br>4. Sehm & Warschburger (2018b)<br>5. Maiano et al., 2016                             | <b>2926</b> | <b>0,25</b>   | <b>[0.06, 0.43]</b>     | <b>8.76E-03 (1.23E-02)</b>   | <b>93,40</b> |
| PS | Community | Clinical                | 4 | 1. Boone et al, (2012)<br>2. Arcelus et al, (2015)<br>3. Boone et al, (2014)<br>4. Boone et al, (2011)                                                                         | <b>1570</b> | <b>0,1659</b> | <b>[0.0607, 0.2711]</b> | <b>2.000E-03 (2.94E-03)</b>  | <b>78,66</b> |
|    |           |                         | 3 | 1. Curzio et al, (2018a)<br>2. Curzio et al, (2018b)<br>3. Curzio et al, (2018c)                                                                                               | <b>384</b>  | <b>0,243</b>  | <b>[0.1265, 0.3595]</b> | <b>4.340E-05 (3.472E-04)</b> | <b>13,01</b> |
|    |           |                         | 3 | 1. Curzio et al, (2018c)<br>2. Boone et al, (2014)<br>3. Boone et al, (2011)                                                                                                   | <b>1132</b> | <b>0,15</b>   | <b>[0.02, 0.29]</b>     | <b>2.40E-02 (4.27E-02)</b>   | <b>74,10</b> |
|    |           |                         | 4 | 1. Curzio et al, (2018a)<br>2. Curzio et al, (2018b)<br>3. Boone et al, (2012)<br>4. Arcelus et al, (2015)                                                                     | <b>822</b>  | <b>0,23</b>   | <b>[0.13, 0.33]</b>     | <b>1.01E-05 (2.89E-05)</b>   | <b>54,01</b> |
| PC | Community |                         | 6 | 1. Arcelus et al, (2015)<br>2. Boone et al, (2012)<br>3. Boone, Vansteen et al, (2014a)<br>4. Boone et al, (2011)<br>5. Boone, Soenens et al, (2014b)<br>6. Gan et al., (2018) | <b>2492</b> | <b>0,33</b>   | <b>[0.23, 0.43]</b>     | <b>1.760E-10 (1.10E-09)</b>  | <b>88,20</b> |

|    |    |                         |    |                                                                                                                                                       |      |       |                |                           |       |
|----|----|-------------------------|----|-------------------------------------------------------------------------------------------------------------------------------------------------------|------|-------|----------------|---------------------------|-------|
|    |    | Clinical                | NA | NA                                                                                                                                                    | NA   | NA    | NA             | NA                        | NA    |
|    |    | Mean age < 14 years old | 3  | 1. Boone et al, (2014a)<br>2. Boone et al, (2011)<br>Boone et al, (2014b)                                                                             | 1580 | 0,38  | [0.29, 0.47]   | 1.70E-16<br>(9.07E-16)    | 77.90 |
|    |    | Mean age > 14 years old | 3  | 1. Arcelus et al., (2015)<br>2. Boone et al, (2012)<br>Gan et al., (2018)                                                                             | 912  | 0,28  | [0.09, 0.46]   | 2.95E-03<br>(5.16E-03)    | 89,50 |
| RT | UN | Community               | 4  | 1. Sehm & Warschburger (2018)<br>2. Sehm & Warschburger (2018)<br>3. Jones et al., 2020<br>4. Fortes et al., 2014                                     | 1677 | 0.35  | [0.08,0.62]    | [1.010E-02<br>(1.40E-02)] | 98.1  |
|    |    | Clinical                | 3  | 1. Curzio et al, (2018a)<br>2. Curzio et al, (2018b)<br>3. Curzio et al, (2018c)                                                                      | 384  | 0.13  | [0.006, 0.254] | 7.820E-02<br>(8.937E-02)  | 31.1  |
|    |    | Mean age < 14 years old | 2  | 1. Curzio et al, (2018c)<br>2. Boone et al, (2010)                                                                                                    | 486  | 0.525 | [0.053, 0.997] | 2.93E-02<br>(4.69E-02)    | 92.5  |
|    |    | Mean age > 14 years old | 5  | 1. Curzio et al, (2018a)<br>2. Curzio et al, (2018b)<br>3. Sehm & Warschburger (2018).1<br>4. Sehm & Warschburger (2018).2<br>5. Jones et al., (2020) | 1575 | 0.18  | [0.10, 0.26]   | 1.10E-05<br>(2.89E-05)    | 59.4  |

|    |                         |   |                                                                                                           |      |      |              |                          |       |
|----|-------------------------|---|-----------------------------------------------------------------------------------------------------------|------|------|--------------|--------------------------|-------|
| PS | Community               | 2 | 1. Boone et al, (2010)<br>2. Boone et al, (2014)                                                          | 1116 | 0.20 | [0.14, 0.26] | 2.890E-10<br>(1.45E-09)  | 16.3  |
|    | Clinical                | 4 | 1. Curzio et al, (2018a)<br>2. Curzio et al, (2018b)<br>3. Curzio et al, (2018c)<br>Serpell et al, (2006) | 433  | 0.17 | [0.06, 0.28] | 3.370E-03<br>(5.728E-03) | 13.1  |
|    | Mean age < 14 years old | 2 | 1. Curzio et al, (2018c)<br>Boone et al, (2010)                                                           | 774  | 0,22 | [0.15, 0.29] | 8.00E-10<br>(3.20E-09)   | 0     |
|    | Mean age > 14 years old | 4 | 1. Curzio et al, (2018a)<br>Curzio et al, (2018b)<br>2. Boone et al, (2014)<br>2. Serpell et al., (2006)  | 775  | 0,16 | [0.08, 0.25] | 1.85E-04<br>(4.32E-04)   | 21,20 |
| PC | Community               | 2 | 1. Boone et al, (2010)<br>2. Boone, Claes et al, (2014)                                                   | 1116 | 0.33 | [0.24, 0.41] | 3.990E-14<br>(3.33E-13)  | 61.00 |
|    | Clinical                | 1 | 1. Serpell et al, (2006)                                                                                  | 49   | NA   | NA           | NA                       | NA    |
|    | Mean age < 14 years old | 1 | 1. Boone et al, (2010)                                                                                    | 156  | NA   | NA           | NA                       | NA    |

|     |    |                         |   |                                                                                                                                                                                      |      |      |               |                          |       |
|-----|----|-------------------------|---|--------------------------------------------------------------------------------------------------------------------------------------------------------------------------------------|------|------|---------------|--------------------------|-------|
|     |    | Mean age > 14 years old | 2 | 1. Boone, Claes et al, (2014)<br>2. Serpell et al, (2006)                                                                                                                            | 509  | 0.28 | [ 0.19, 0.36] | 4.36E-11<br>(3.05E-10)   | 0.80  |
| WSC | UN | Community               | 2 | 1. Sehm & Warschburger (2018a)<br>2. Sehm & Warschburger (2018b)                                                                                                                     | 1039 | 0,23 | [0.10, 0.36]  | 5.630E-04<br>(9.38E-04)  | 80,93 |
|     |    | Clinical                | 2 | 1. Eddy et al, (2007)<br>2. Jones et al, (2020)                                                                                                                                      | 392  | 0,10 | [-0.41, 0.61] | 7.020E-01<br>(7.020E-01) | 96,12 |
|     |    | Mean age < 14 years old | 1 | 1. Eddy et al, (2007)                                                                                                                                                                | 122  | NA   | NA            | NA                       | NA    |
|     |    | Mean age > 14 years old | 3 | 1. Sehm & Warschburger (2018a)<br>2. Sehm & Warschburger (2018b)<br>3. Jones et al., 2020                                                                                            | 1309 | 0.27 | [0.16, 0.38]  | 3.03E-06<br>(1.06E-05)   | 80.00 |
|     | PS | Community               | 6 | 1. Boone, Claes et al, (2014a)<br>2. Boone et al, (2010)<br>3. Boone, Soenens et al, (2014b)<br>4. Stornaes et al, (2019)<br>5. Wade et al, (2015)<br>6. Swierczynska et al., (2020) | 3674 | 0.15 | [0.09, 0.22]  | 2.040E-06<br>(5.10E-06)  | 63.90 |

|    |                         |   |                                                                                                                                                                                      |             |             |                     |                             |              |
|----|-------------------------|---|--------------------------------------------------------------------------------------------------------------------------------------------------------------------------------------|-------------|-------------|---------------------|-----------------------------|--------------|
|    | Clinical                | 1 | 1. Serpell et al, (2006)                                                                                                                                                             | NA          | NA          | NA                  | NA                          | NA           |
|    | Mean age < 14 years old | 3 | 1. Boone et al, (2010)<br>2. Boone et al, (2014b)<br>3. Wade et al, (2015)                                                                                                           | <b>2037</b> | <b>0,17</b> | <b>[0.06, 0.29]</b> | <b>2.66E-03 (6.08E-03)</b>  | <b>85,90</b> |
|    | Mean age > 14 years old | 2 | 1. Boone et al, (2014a)<br>2. Serpell et al, (2006)                                                                                                                                  | <b>542</b>  | <b>0.16</b> | <b>[0.07, 0.25]</b> | <b>5.65E-04 (1.19E-03)</b>  | <b>2.8</b>   |
| PC | Community               | 6 | 1. Boone, Claes et al, (2014a)<br>2. Boone et al, (2010)<br>3. Boone, Soenens et al, (2014b)<br>4. Stornaes et al, (2019)<br>5. Wade et al, (2015)<br>6. Swierczynska et al., (2020) | <b>3674</b> | <b>0.34</b> | <b>[0.25, 0.42]</b> | <b>9.920E-16 (1.24E-14)</b> | <b>87.80</b> |
|    | Clinical                | 1 | 1. Serpell et al, (2006)                                                                                                                                                             | 49          | NA          | NA                  | NA                          | NA           |
|    | Mean age < 14 years old | 3 | 1. Boone et al, (2010)<br>2. Boone et al, (2014b)<br>3. Wade et al, (2015)                                                                                                           | <b>2037</b> | <b>0,41</b> | <b>[0.33, 0.50]</b> | <b>4.74E-24 (3.79E-23)</b>  | <b>79,08</b> |
|    | Mean age > 14 years old | 2 | 1. Boone et al, (2014a)<br>2. Serpell et al, (2006)                                                                                                                                  | <b>509</b>  | <b>0.28</b> | <b>[0.20, 0.36]</b> | <b>5.46E-12 (5.73E-11)</b>  | <b>0.00</b>  |

|           |    |                         |    |                                                                                                                                                                   |             |             |                      |                                 |              |
|-----------|----|-------------------------|----|-------------------------------------------------------------------------------------------------------------------------------------------------------------------|-------------|-------------|----------------------|---------------------------------|--------------|
| <b>BD</b> | UN | Community               | 3  | 1. Warschburger & Zitzmann, 2018<br>2. Maiano et al., 2016<br>3. Mockdece Neves et al., 2016                                                                      | <b>1531</b> | <b>0.06</b> | <b>[-0.11, 0.24]</b> | <b>4.630E-01<br/>(4.82E-01)</b> | <b>86.8</b>  |
|           |    | Clinical                | NA | NA                                                                                                                                                                | NA          | NA          | NA                   | NA                              | NA           |
|           |    | Mean age < 14 years old | 2  | 1. Warschburger & Zitzmann, 2018<br>2. Mockdece Neves et al., 2016                                                                                                | <b>1240</b> | <b>0,15</b> | <b>[ 0.10, 0.21]</b> | <b>5.49E-08<br/>(1.76E-07)</b>  | <b>0.00</b>  |
|           |    | Mean age > 14 years old | 1  | 1. Maiano et al., 2016                                                                                                                                            | 291         | NA          | NA                   | NA                              | NA           |
|           | PS | Community               | 6  | 1. Arcelus et al., (2015)<br>2. Boone et al, (2014)<br>3. Boone et al, (2011)<br>4. Ruggiero et al, (2003)<br>5. Boone et al, (2012)<br>6. Rosewall et al, (2018) | <b>1746</b> | <b>0.12</b> | <b>[-0.03, 0.26]</b> | <b>1.160E-01<br/>(1.32E-01)</b> | <b>88.90</b> |
|           |    | Clinical                | NA | NA                                                                                                                                                                | NA          | NA          | NA                   | NA                              | NA           |
|           |    | Mean age < 14 years old | 2  | 1. Boone et al, (2014)<br>2. Boone et al, (2011)                                                                                                                  | <b>1014</b> | <b>0.04</b> | <b>[-0.04, 0.13]</b> | <b>3.38E-01<br/>(3.61E-01)</b>  | <b>50.90</b> |

|     |    |                         |    |                                                                                                                                                                                                                          |      |      |               |                      |       |
|-----|----|-------------------------|----|--------------------------------------------------------------------------------------------------------------------------------------------------------------------------------------------------------------------------|------|------|---------------|----------------------|-------|
|     |    | Mean age > 14 years old | 3  | 1. Arcelus et al, (2015)<br>2. Boone et al, (2012)<br>3. Rosewall et al, (2018)                                                                                                                                          | 690  | 0.20 | [-0.04, 0.44] | 9.89E-02 (1.30E-01)  | 91.50 |
|     | PC | Community               | 7  | 1. Arcelus et al, (2015)<br>2. Boone et al, (2012)<br>3. Ruggiero et al, (2003)<br>4. Boone et al, (2011)<br>5. Lyman & Luthar (2014).1<br>6. Lyman & Luthar (2014).2<br>7. Rosewall et al, (2018)                       | 1687 | 0.30 | [ 0.17, 0.42] | 4.320E-0 (9.82E-06)  | 88.00 |
|     |    | Clinical                | NA | NA                                                                                                                                                                                                                       | NA   | NA   | NA            | NA                   | NA    |
|     |    | Mean age < 14 years old | 1  | 1. Boone et al, (2011)                                                                                                                                                                                                   | 559  | NA   | NA            | NA                   | NA    |
|     |    | Mean age > 14 years old | 3  | 1. Arcelus et al, (2015)<br>2. Boone et al, (2012)<br>3. Rosewall et al, (2018)                                                                                                                                          | 787  | 0.38 | [0.12, 0.64]  | 3.82E-03 (6.17E-03)  | 95.10 |
| ITI | UN | Community               | 8  | 1. Chen et al., (2010a)<br>2. Chen et al., (2010b)<br>3. Sehm & Warschburger (2018a)<br>4. Sehm & Warschburger (2018b)<br>5. Francisco & al. (2015).1<br>6. Francisco & al. (2015).2<br>7. Warschburger & Zitzmann, 2018 | 3617 | 0.19 | [ 0.09, 0.28] | 1.400E-04 (2.92E-04) | 88.88 |

|    |    |                         |    |                                                                                                                                                       |      |      |               |                      |       |
|----|----|-------------------------|----|-------------------------------------------------------------------------------------------------------------------------------------------------------|------|------|---------------|----------------------|-------|
|    |    |                         |    | 8. Mockdece Neves et al., 2016                                                                                                                        |      |      |               |                      |       |
|    |    | Clinical                | 1  | 1. Eddy et al, (2007)                                                                                                                                 | 122  | NA   | NA            | NA                   | NA    |
|    |    | Mean age < 14 years old | 5  | 1. Eddy et al, (2007)<br>2. Francisco & al. (2015)<br>3. Francisco & al. (2015)<br>4. Warschburger & Zitzmann, 2018<br>5. Mockdece Neves et al., 2016 | 1817 | 0.02 | [-0.15, 0.19] | 8.20E-01 (8.20E-01)  | 90.10 |
|    |    | Mean age > 14 years old | 2  | 1. Sehm & Warschburger (2018a)<br>2. Sehm & Warschburger (2018b)                                                                                      | 1039 | 0,36 | [0.28, 0.44]  | 6.80E-20 (1.43E-18)  | 53,55 |
| IA | UN | Community               | 5  | 3. Faust (1987)<br>4. Sehm & Warschburger (2018a)<br>5. Sehm & Warschburger (2018b)<br>6. Maiano et al., 2016 (1)<br>7. Maiano et al., 2016 (2)       | 2298 | 0.25 | [ 0.11, 0.38] | 3.190E-04 (5.70E-04) | 91.00 |
|    |    | Clinical                | NA | NA                                                                                                                                                    | NA   | NA   | NA            | NA                   | NA    |
|    |    | Mean age < 14 years old | 2  | 1. Faust (1987)<br>2. Maiano et al., 2016 (2)                                                                                                         | 968  | 0.13 | [-0.10, 0.36] | 2.74E-01 (3.13E-01)  | 76.00 |

|           |    |                         |    |                                                                                                                                                                                     |      |      |               |                      |       |
|-----------|----|-------------------------|----|-------------------------------------------------------------------------------------------------------------------------------------------------------------------------------------|------|------|---------------|----------------------|-------|
|           |    | Mean age > 14 years old | 3  | 1. Sehm & Warschburger (2018a)<br>2. Sehm & Warschburger (2018b)<br>3. Maiano et al., 2016 (1)                                                                                      | 1330 | 0.32 | [0.19, 0.44]  | 4.23E-07 (2.22E-06)  | 84.30 |
| <b>DT</b> | UN | Community               | 6  | 1. Custers & Van den Buck (2009)<br>2. Faust (1987)<br>3. Warschburger & Zitzmann, 2018<br>4. Maiano et al., 2016 (1)<br>5. Simmons et al., 2002 (1)<br>6. Simmons et al., 2002 (2) | 2874 | 0.22 | [ 0.17, 0.27] | 5.290E-17 (1.32E-15) | 45.70 |
|           |    | Clinical                | NA | NA                                                                                                                                                                                  | NA   | NA   | NA            | NA                   | NA    |
|           |    | Mean age < 14 years old | 4  | 1. Custers & Van den Bulk (2009)<br>2. Faust (1987)<br>3. Warschburger & Zitzmann, 2018<br>4. Simmons et al., 2002 (1)                                                              | 2283 | 0.24 | [0.19, 0.28]  | 4.91E-25 (7.86E-24)  | 18.40 |
|           |    | Mean age > 14 years old | 2  | 1. Maiano et al., 2016 (1)<br>2. Simmons et al., 2002                                                                                                                               | 591  | 0.18 | [ 0.05, 0.31] | 7.58E-03 (1.14E-02)  | 66.00 |
|           | PS | Community               | 3  | 1. Boone et al, (2012)<br>2. Boone et al (2014)<br>3. Ruggiero et al, (2003)                                                                                                        | 772  | 0.11 | [-0.00, 0.22] | 5.750E-02 (6.94E-02) | 49.20 |
|           |    | Clinical                | NA | NA                                                                                                                                                                                  | NA   | NA   | NA            | NA                   | NA    |

|     |    |                         |    |                                                                               |      |      |               |                      |       |
|-----|----|-------------------------|----|-------------------------------------------------------------------------------|------|------|---------------|----------------------|-------|
|     |    | Mean age < 14 years old | 1  | 1. Boone et al (2014)                                                         | 455  | NA   | NA            | NA                   | NA    |
|     |    | Mean age > 14 years old | 1  | 1. Boone et al, (2012)                                                        | 275  | NA   | NA            | NA                   | NA    |
|     | PC | Community               | 3  | 1. Boone et al, (2012)<br>2. Ruggiero et al, (2003)<br>3. Boone et al, (2014) | 772  | 0.31 | [0.20, 0.42]  | 3.120E-08 (1.11E-07) | 53.90 |
|     |    | Clinical                | NA | NA                                                                            | NA   | NA   | NA            | NA                   | NA    |
|     |    | Mean age < 14 years old | 1  | 1. Boone et al, (2014)                                                        | 455  | NA   | NA            | NA                   | NA    |
|     |    | Mean age > 14 years old | 1  | 2. Boone et al, (2012)                                                        | 317  | NA   | NA            | NA                   | NA    |
|     |    |                         |    |                                                                               |      |      |               |                      |       |
| EAC | PC | Community               | 3  | 1. Boone et al, (2014)<br>2. Boone et al, (2010)<br>3. Swierczynska, 2020     | 1461 | 0.34 | [0.21, 0.46]  | 1.460E-07 (4.56E-07) | 86.50 |
|     |    | Clinical                | 1  | 1. Serpell et al, (2006)                                                      | 49   | NA   | NA            | NA                   | NA    |
|     |    | Mean age < 14 years old | 1  | 1. Boone et al, (2010)                                                        | 656  | NA   | NA            | NA                   | NA    |
|     |    | Mean age > 14 years old | 2  | 1. Serpell et al, (2006)<br>2. Boone et al, (2014)                            | 509  | 0.14 | [-0.27, 0.56] | 5.02E-01 (5.27E-01)  | 88.00 |

|    |                         |   |                                                                           |             |             |                      |                             |              |
|----|-------------------------|---|---------------------------------------------------------------------------|-------------|-------------|----------------------|-----------------------------|--------------|
| PS | Community               | 3 | 3. Boone et al, (2010)<br>4. Boone et al, (2014)<br>5. Swierczynska, 2020 | <b>1461</b> | <b>0.20</b> | <b>[0.13, 0.27]</b>  | <b>1.070E-08 (4.46E-08)</b> | <b>46.3</b>  |
|    | Clinical                | 1 | 1. Serpell et al, (2006)                                                  | 49          | NA          | NA                   | NA                          | NA           |
|    | Mean age < 14 years old | 1 | 1. Boone et al, (2010)                                                    | 656         | NA          | NA                   | NA                          | NA           |
|    | Mean age > 14 years old | 2 | 1. Boone et al, (2014)<br>2. Serpell et al, (2006)                        | <b>705</b>  | <b>0.14</b> | <b>[-0.04, 0.31]</b> | <b>1.21E-01 (1.41E-01)</b>  | <b>43.80</b> |

Note. Total: ED symptoms total scores on scales; UN: unidimensional perfectionism, PS: Perfectionistic Striving; PC: Perfectionistic Concern; NC=Community; CN=Clinical; BE: Binge eating; RT: Restraint; WSC: Weight/shape Concerns; BD = Body Dissatisfaction; ITI: Internalization of the Thin Ideal (composite of IBSS-R and SATAQ); LL: Lower Limit; UL: Upper Limit;  $I^2$ : total heterogeneity/total variability; Significant results after correction are in bold.

**Supplementary Figure S5. Forest plot of the magnitude of the association between unidimensional perfectionism, perfectionistic strivings, perfectionistic concerns and eating global scores (subdivided by their clinical status and their mean age).**

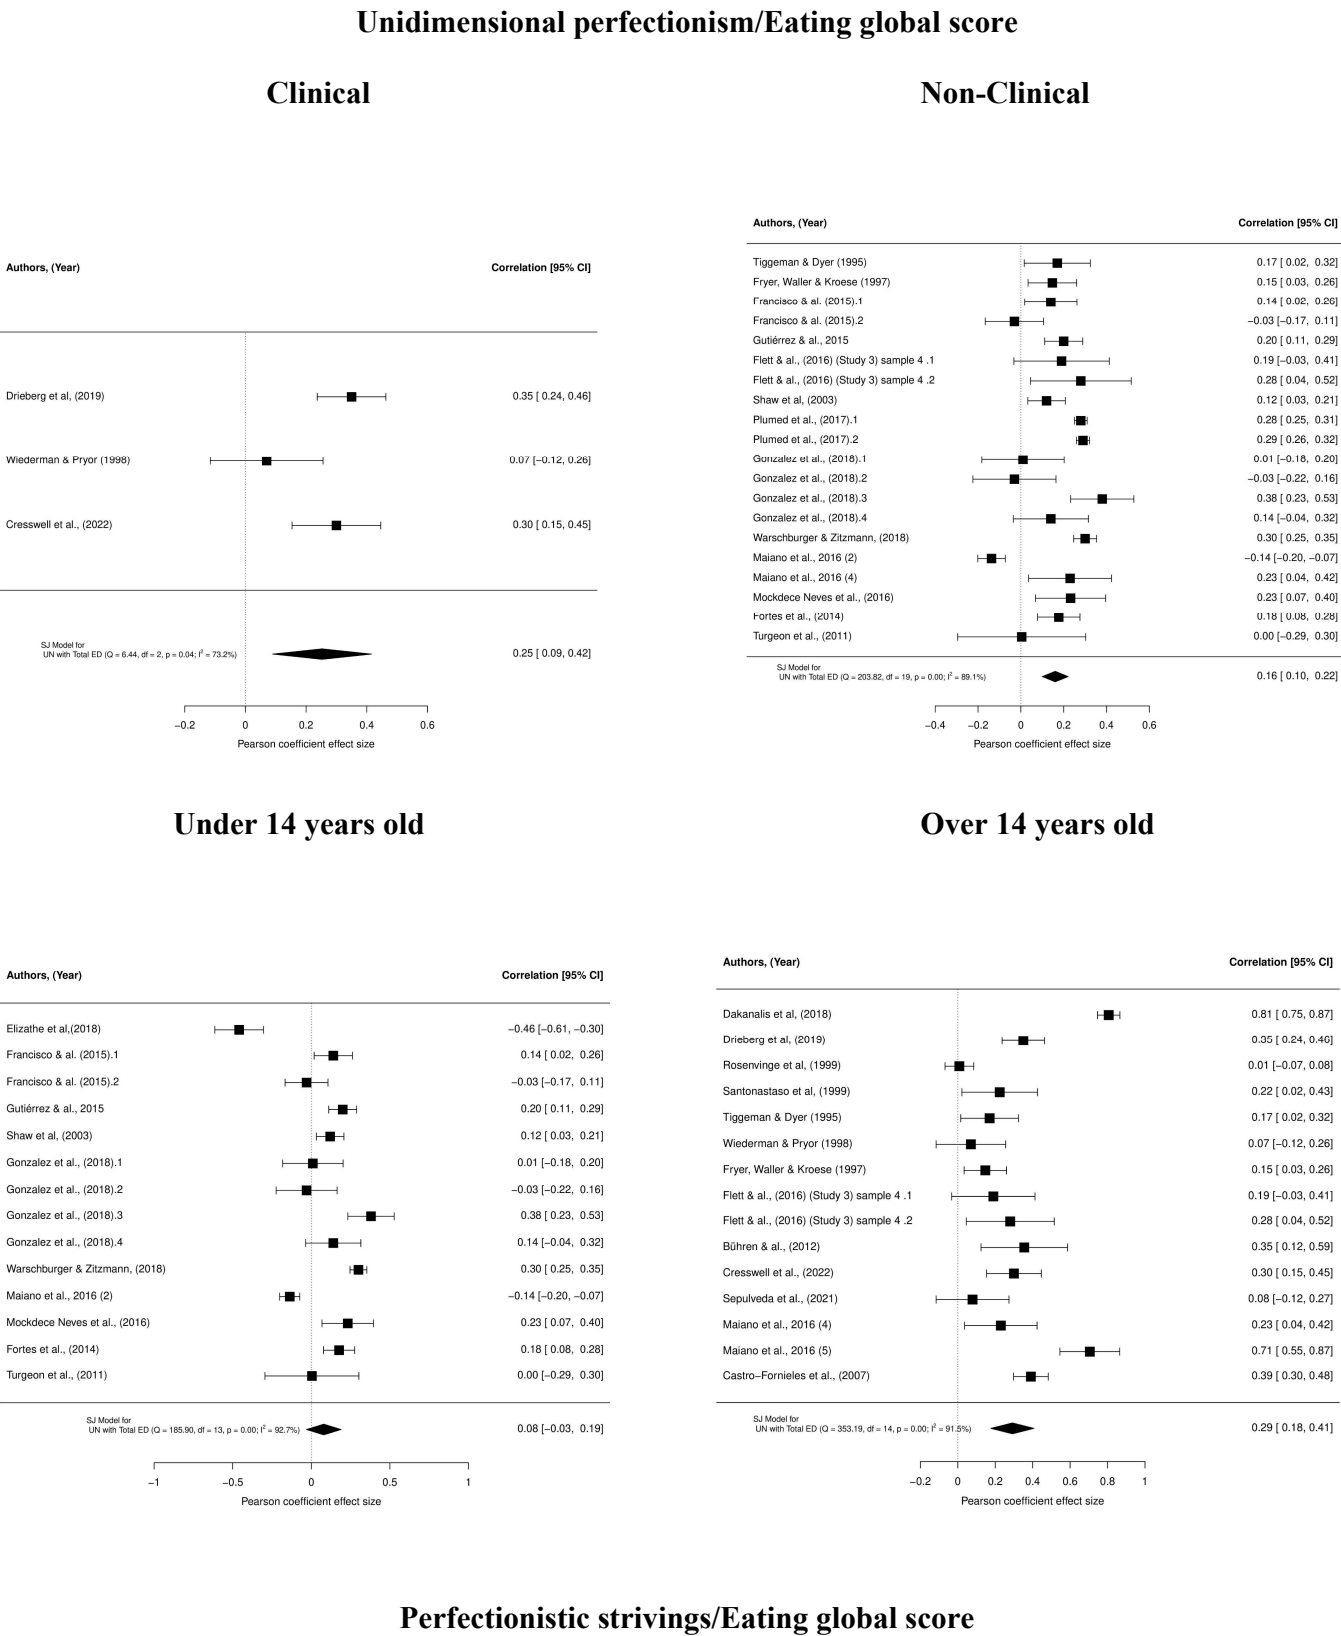

Clinical

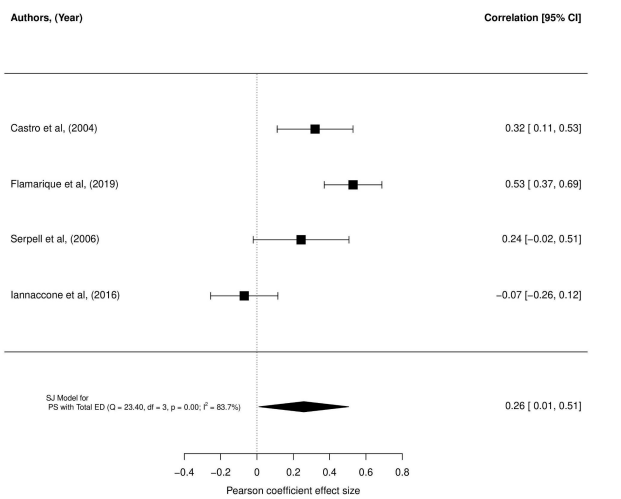

Non-Clinical

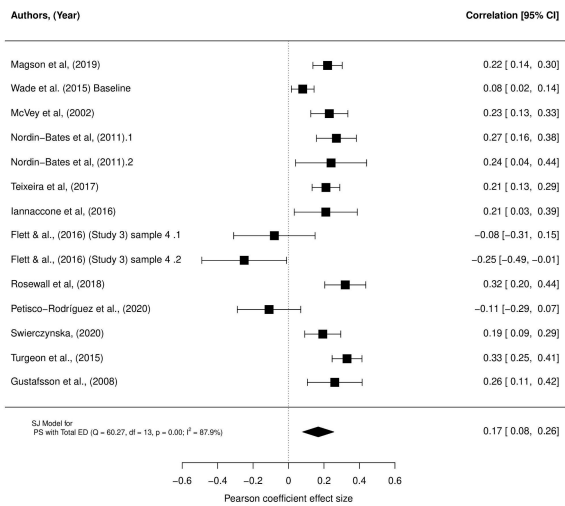

Under 14 years old

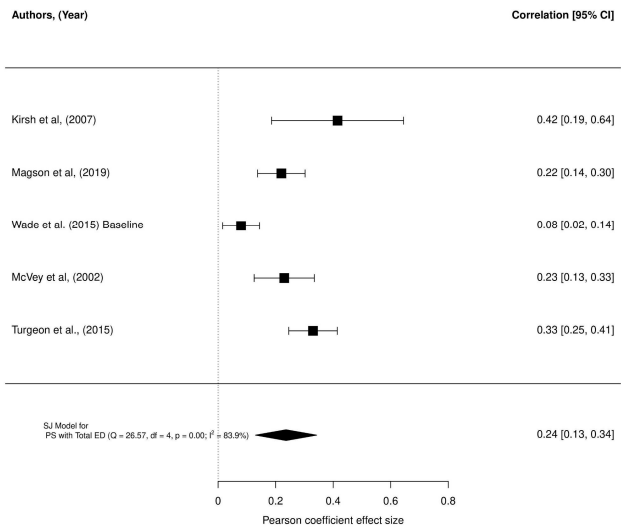

Over 14 years old

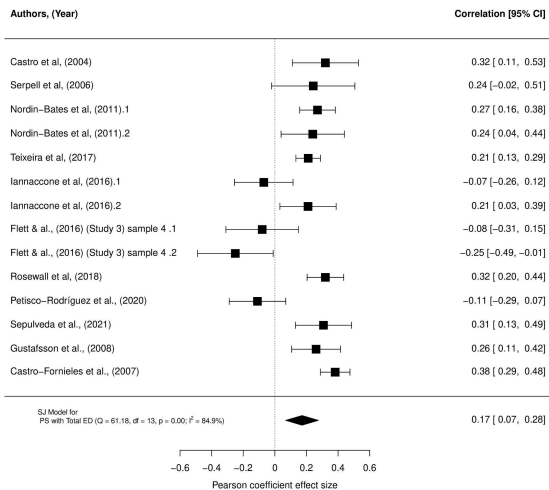

## Perfectionistic concerns/Eating global score

### Clinical

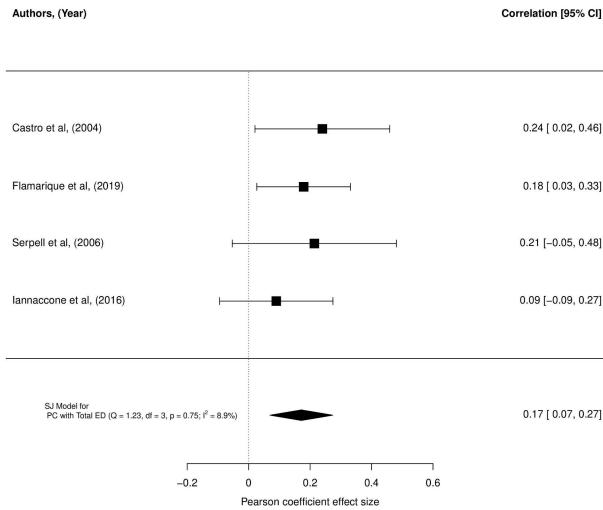

### Non-Clinical

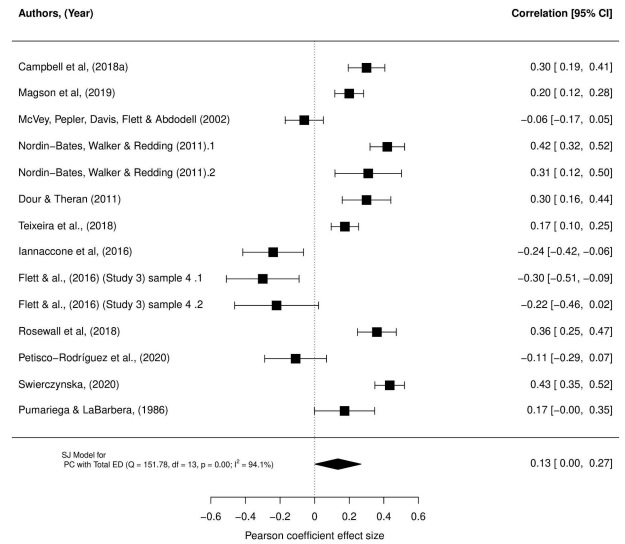

### Under 14 years old

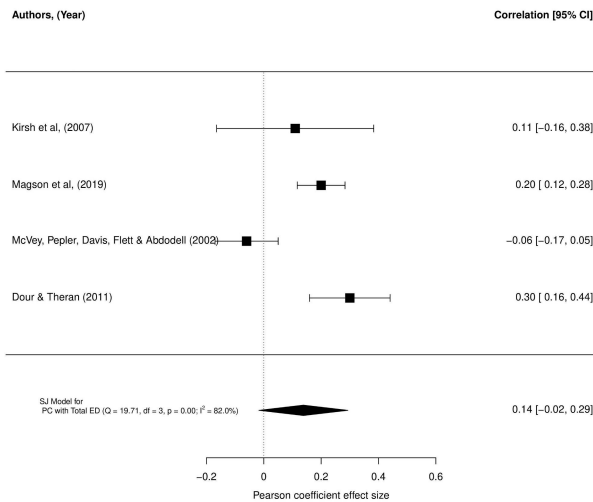

### Over 14 years old

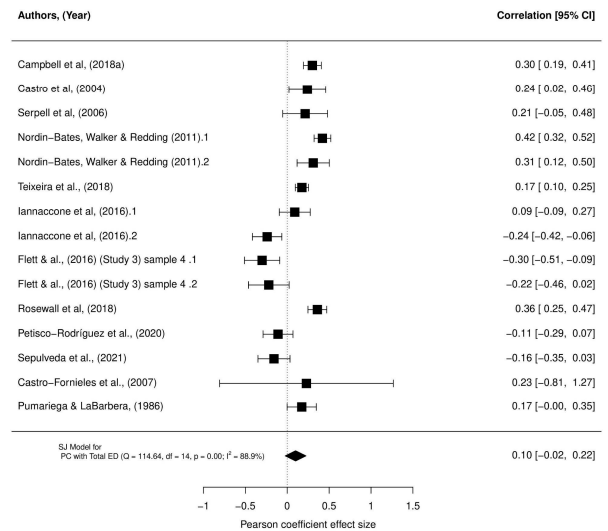

Note. Random-effect meta-analytic effect sizes of perfectionistic concerns; Included samples are presented on the left of the forest plots, with 95% confidence intervals around the Pearson's correlation effect sizes on the right. Squares represent original studies' correlation effect size surrounded by the 95% confidence intervals. Diamonds represent the random-effect meta-analytic effect sizes.  $I^2$  statistics quantify the heterogeneity in the random-effect meta-analyses.

**Supplementary Figure S6. Forest plot of the magnitude of the association between unidimensional perfectionism and eating related symptoms (subdivided by their clinical status and their mean age).**

UN/Binge Eating (BE)

Clinical

Non-Clinical

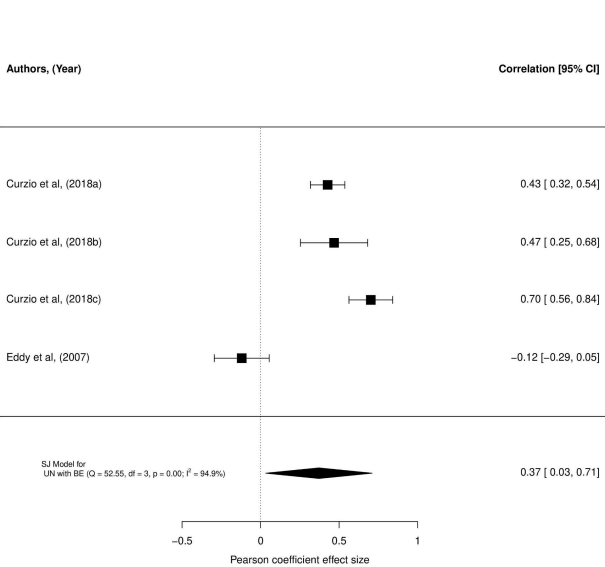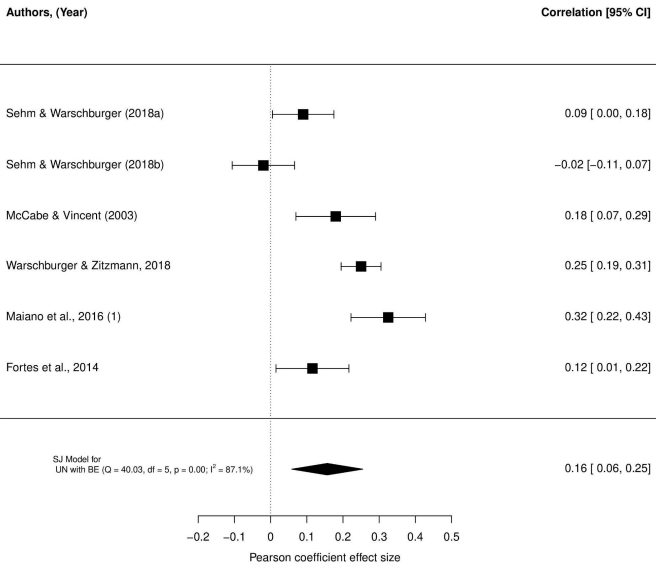

Under 14 years old

Over 14 years old

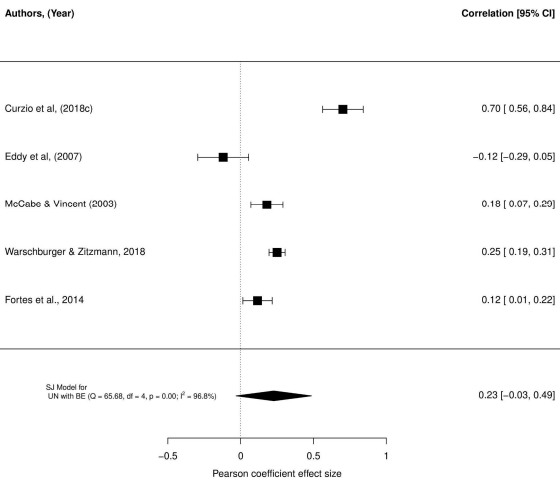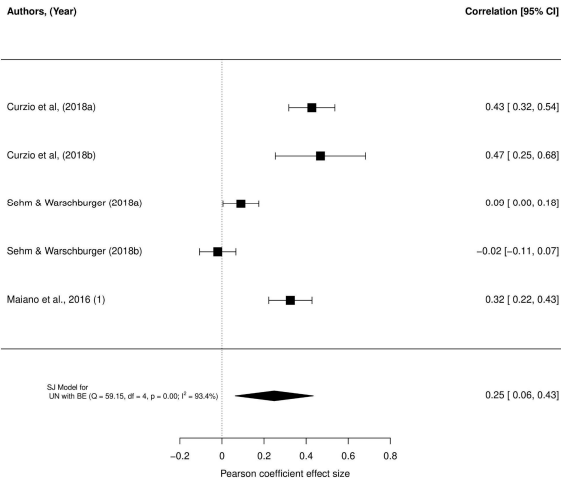

## UN/Dietary Restraint (RT)

### Clinical

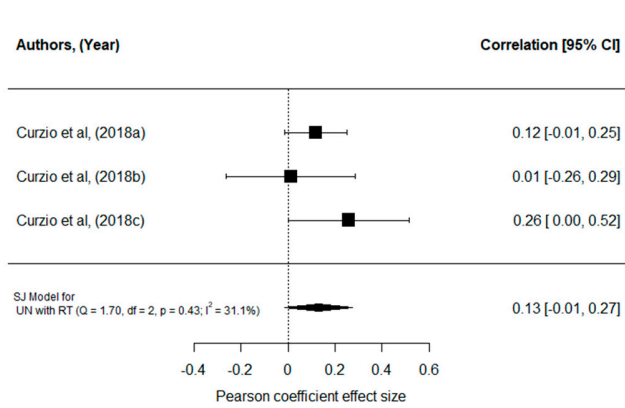

### Non-Clinical

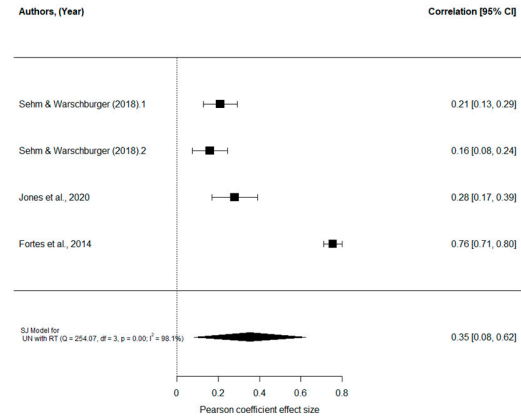

## UN/Internalization Thin Ideal (ITI)

### Under 14 years old

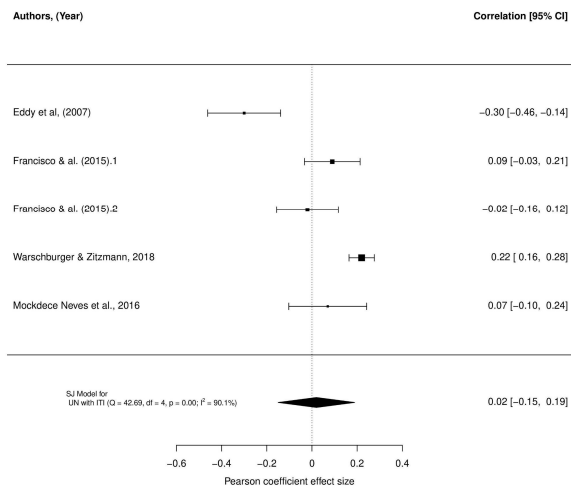

### Over 14 years old

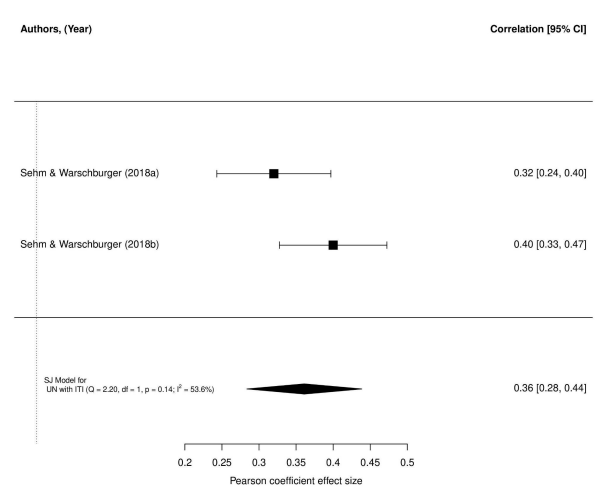

## UN/Weight and Shape Concerns (WSC)

### Clinical

### Non-Clinical

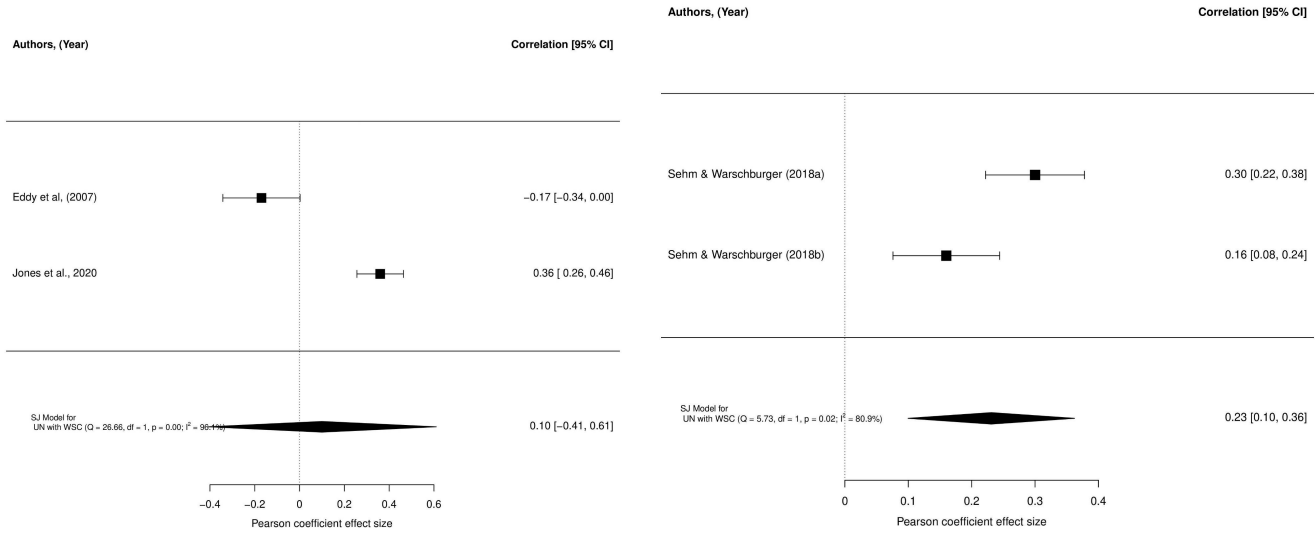

Note. UN: Unidimensional perfectionism. Random-effect meta-analytic effect sizes of perfectionistic concerns; Included samples are presented on the left of the forest plots, with 95% confidence intervals around the Pearson's correlation effect sizes on the right. Squares represent original studies' correlation effect size surrounded by the 95% confidence intervals. Diamonds represent the random-effect meta-analytic effect sizes.  $I^2$  statistics quantify the heterogeneity in the random-effect meta-analyses.

**Supplementary Figure S7. Forest plot of the magnitude of the association between perfectionistic strivings and eating related symptoms (subdivided by their clinical status and their mean age).**

**PS/Binge Eating (BE)**

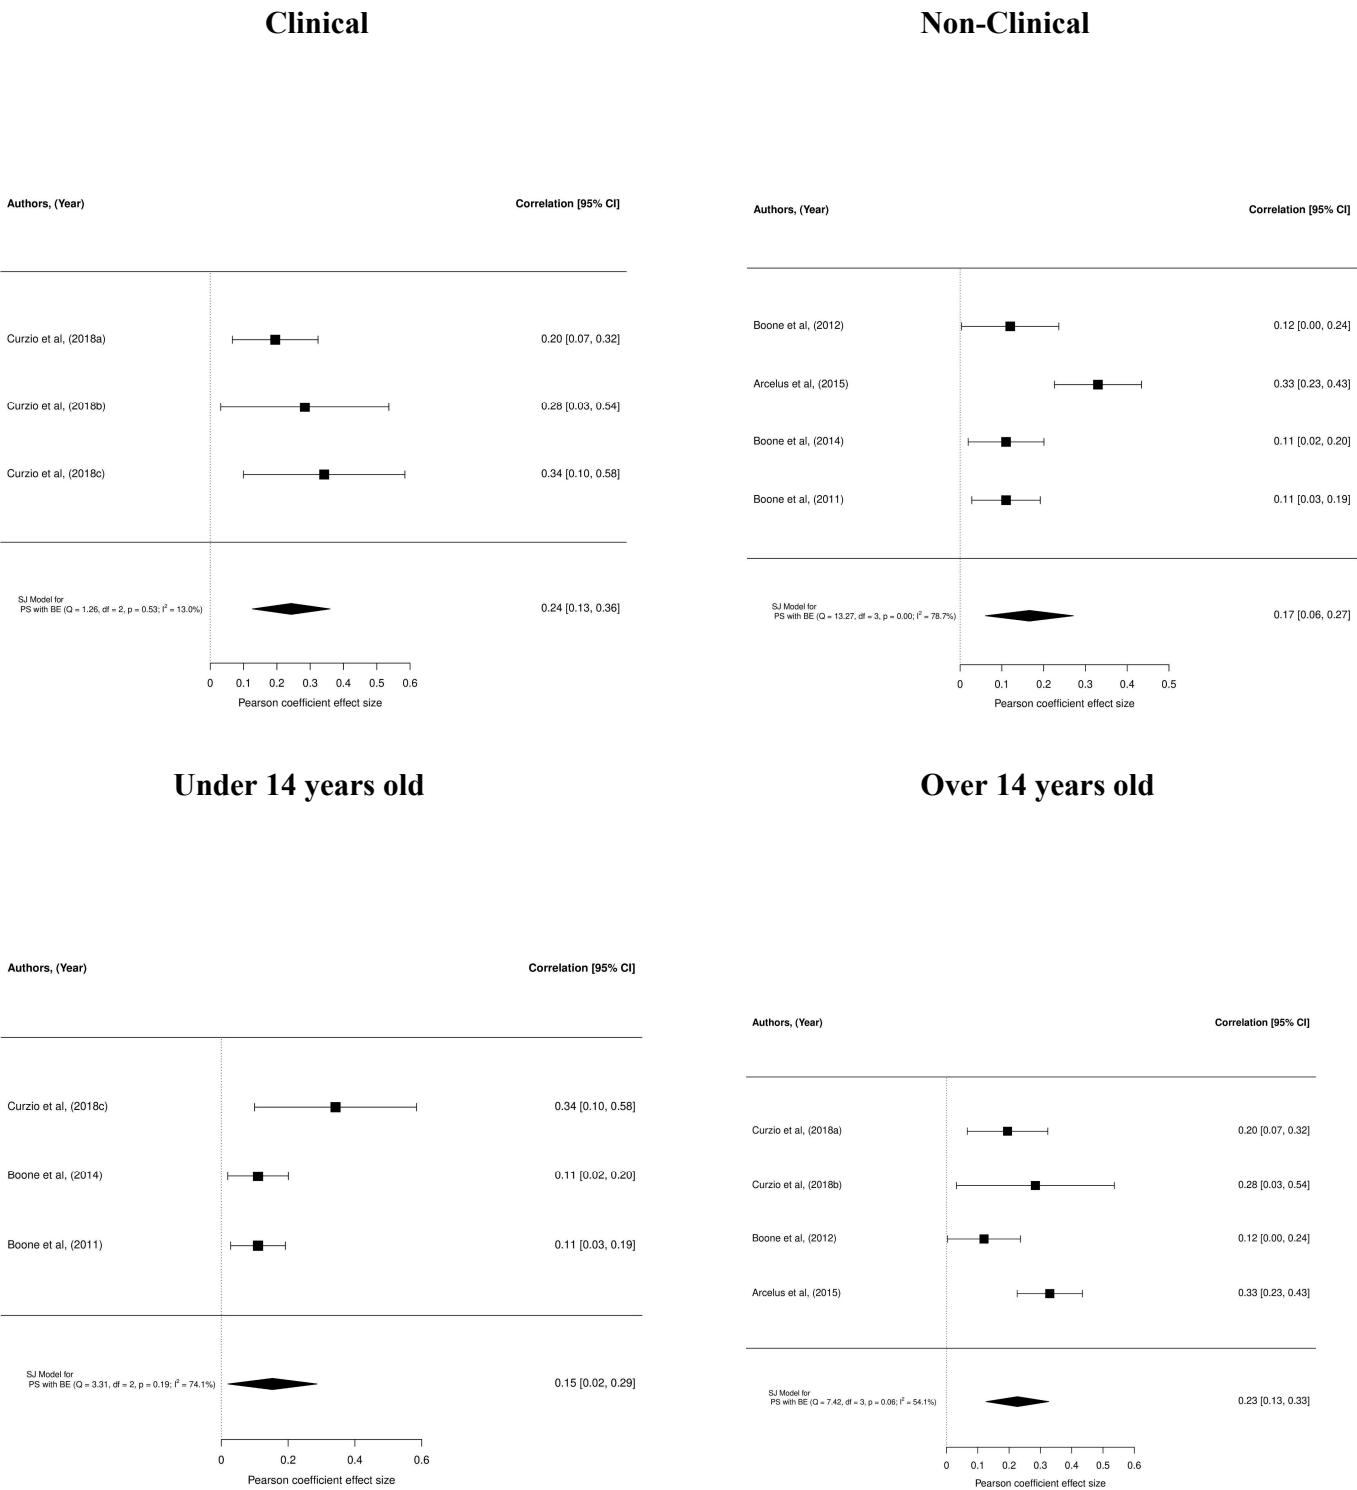

## PS/Restraint (RT)

### Under 14 years old

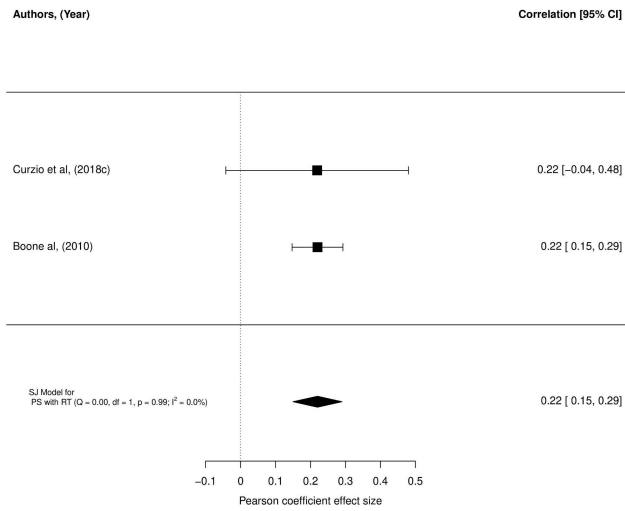

### Over 14 years old

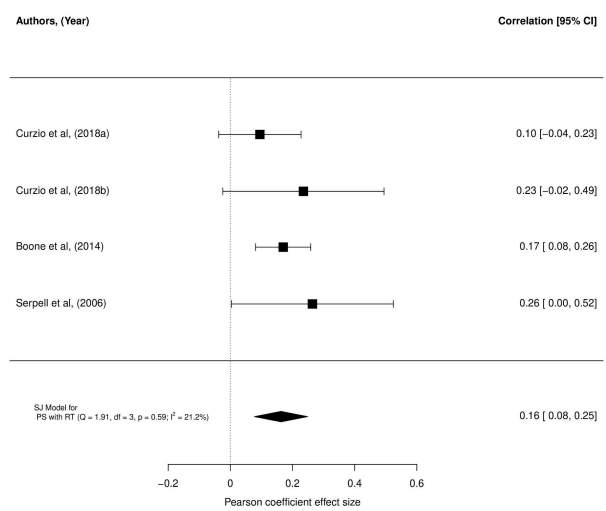

### Non-Clinical

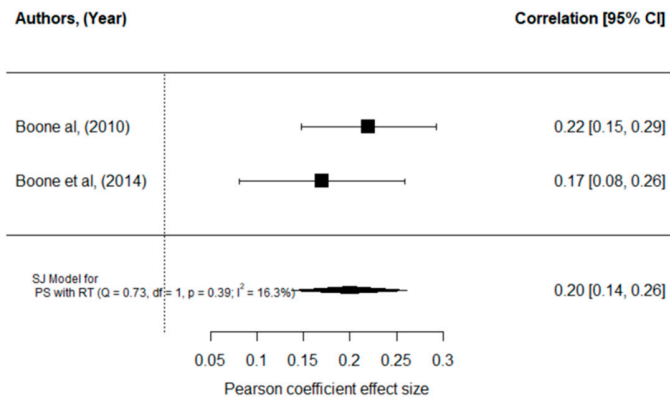

## PS/Body Dissatisfaction (BD)

### Under 14 years old

### Over 14 years old

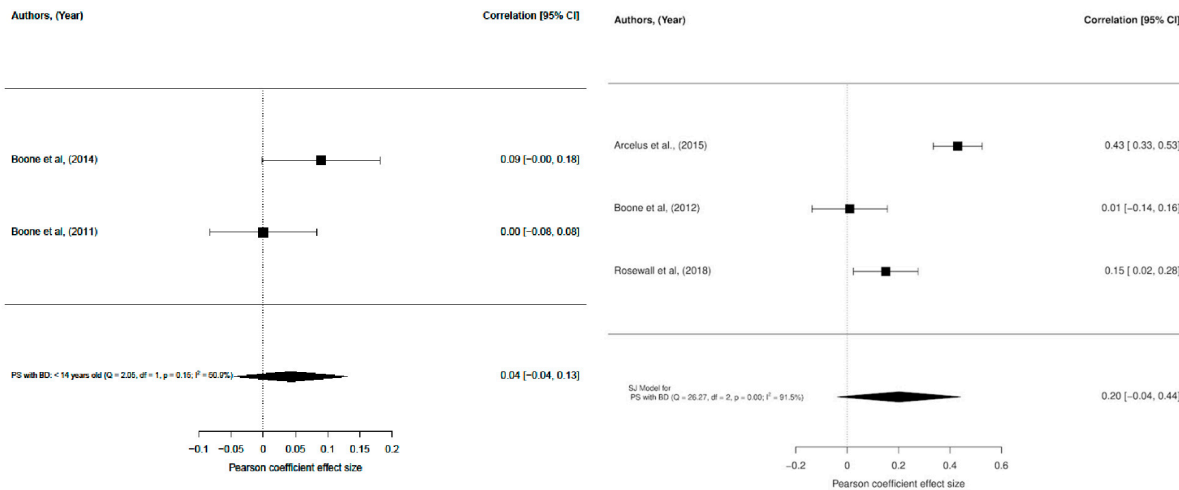

## PS/Weight and Shape Concerns (WSC)

### Under 14 years old

### Over 14 years old

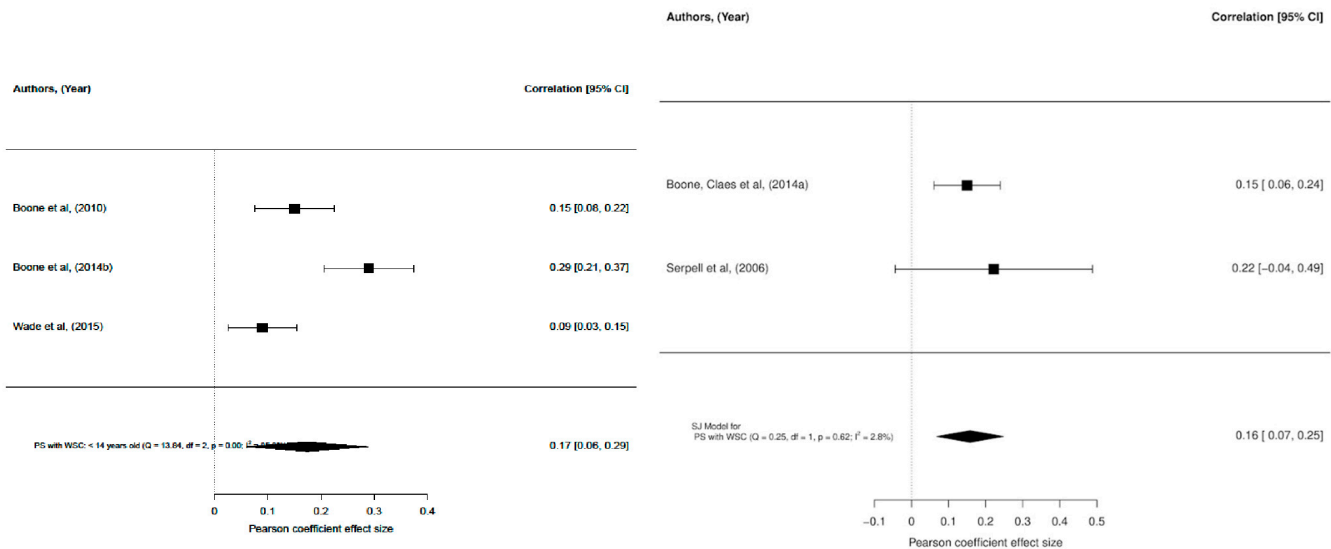

Note. PS: Perfectionistic strivings. Random-effect meta-analytic effect sizes of perfectionistic concerns; Included samples are presented on the left of the forest plots, with 95% confidence intervals around the Pearson's correlation effect sizes on the right. Squares represent original studies' correlation effect size surrounded by the 95% confidence intervals. Diamonds represent the random-effect meta-analytic effect sizes.  $I^2$  statistics quantify the heterogeneity in the random-effect meta-analyses.

**Supplementary Figure S8. Forest plot of the magnitude of the association between perfectionistic concerns, eating related symptoms (subdivided by their clinical status and their mean age).**

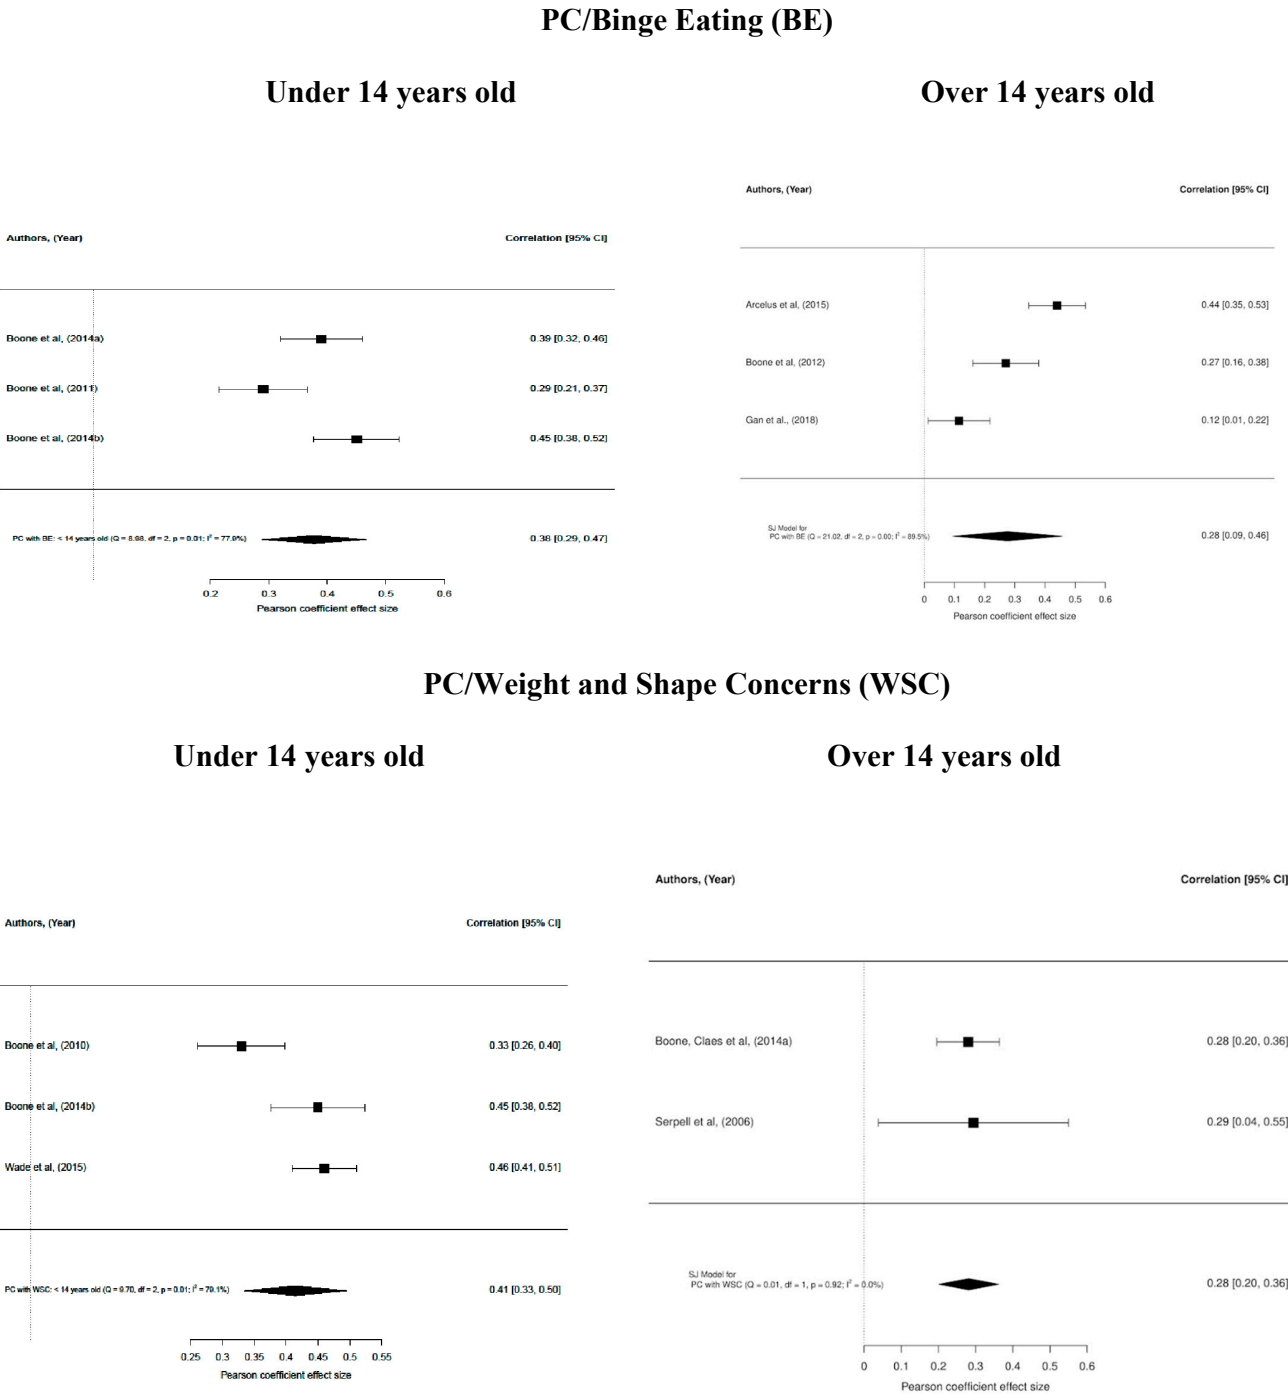

Note. PC: Perfectionistic Concerns. Random-effect meta-analytic effect sizes of perfectionistic concerns; Included samples are presented on the left of the forest plots, with 95% confidence intervals around the Pearson’s correlation effect sizes on the right. Squares represent original studies’ correlation effect size surrounded by the 95% confidence intervals. Diamonds represent the random-effect meta-analytic effect sizes.  $I^2$  statistics quantify the heterogeneity in the random-effect meta-analyses.

## References

- al-Subaie, A. S., Bamgboye, E., al-Shammari, S., al-Sabhan, K. N., al-Shehri, S. N., & Bannah, A. R. (1996). Validity of the Arabic version of the eating disorders inventory (EDI). *The British journal of psychiatry : the journal of mental science*, 168(5), 636-640.
- American Psychiatric Association. (1994). *Diagnostic and Statistical Manual of Mental Disorders: Fourth Edition (DSM-IV)*. American Psychiatric Association.
- Arcelus, J., García-Dantas, A., Sánchez- Martín, M., & Del Río, C. (2015). Influence of perfectionism on variables associated to eating disorders in dance students. *Rev Psicol Deporte*, 24(2), 297-303.
- Bachar, E., Gur, E., Canetti, L., Berry, E., & Stein, D. (2010). Selflessness and perfectionism as predictors of pathological eating attitudes and disorders: A longitudinal study. *European Eating Disorders Review*, 18(6), 496-506. <https://doi.org/10.1002/erv.984>
- Beaudoin, C., Sainte-Marie, D. M., & Bottamini, G. (2001). Traduction et validation canadienne française d'une échelle portant sur l'estime de son corps. *Avante*, 9, 15-20.
- Benjamin, L. (2000). *Intrex User's manual*. Univ Utah.
- Bento, C., Pereira, A. T., Maia, B., Marques, M., Soares, M. J., Bos, S., Valente, J., Gomes, A., Azevedo, M. H., & Macedo, A. (2010). Perfectionism and eating behaviour in Portuguese adolescents. *European Eating Disorders Review*, 18(4), 328-337. <https://doi.org/10.1002/erv.981>
- Berscheid, E., Walster, E., & Bohrnstedt, G. (1973). The happy American body: A survey report. *Psychology Today*, 7, 119-131.
- Blasczyk-Schiep, S., Adamczewska, K., & Funez Sokola, K. (2019). Subclinical eating disorder symptoms and positive vs. negative affect in high school students: The mediating role of self-regulation. *Current Issues in Personality Psychology*, 7(2), 120-131. <https://doi.org/https://dx.doi.org/10.5114/cipp.2019.83125>
- Boone, L., Claes, L., & Luyten, P. (2014). Too strict or too loose? Perfectionism and impulsivity: the relation with eating disorder symptoms using a person-centered approach. *Eating behaviors*, 15(1), 17-23. <https://doi.org/10.1016/j.eatbeh.2013.10.013>
- Boone, L., Soenens, B., & Braet, C. (2011). Perfectionism, Body Dissatisfaction, and Bulimic Symptoms: The Intervening Role of Perceived Pressure to be Thin and Thin Ideal Internalization. *Journal of Social and Clinical Psychology*, 30(10), 1043-1068. <https://doi.org/10.1521/jscp.2011.30.10.1043>
- Boone, L., Soenens, B., Braet, C., & Goossens, L. (2010). An empirical typology of perfectionism in early-to-mid adolescents and its relation with eating disorder symptoms. *Behaviour Research and Therapy*, 48(7), 686-691. <https://doi.org/10.1016/j.brat.2010.03.022>
- Boone, L., Soenens, B., & Luyten, P. (2014). When or why does perfectionism translate into eating disorder pathology? A longitudinal examination of the moderating and mediating role of body dissatisfaction. *Journal of Abnormal Psychology*, 123(2), 412-418. <https://doi.org/10.1037/a0036254>
- Boone, L., Soenens, B., Mouratidis, A., Vansteenkiste, M., Verstuyf, J., & Braet, C. (2012). Daily fluctuations in perfectionism dimensions and their relation to eating disorder symptoms. *Journal of Research in Personality*, 46(6), 678-687. <https://doi.org/10.1016/j.jrp.2012.08.001>
- Boone, L., Vansteenkiste, M., Soenens, B., Van der Kaap-Deeder, J., & Verstuyf, J. (2014). Self-critical perfectionism and binge eating symptoms: a longitudinal test of the intervening role of psychological need frustration. *Journal of Counseling Psychology*, 61(3), 363-373. <https://doi.org/10.1037/a0036418>
- Bryant-Waugh, R. J., Cooper, P. J., Taylor, C. L., & Lask, B. D. (1996). The use of the eating disorder examination with children: A pilot study. *International Journal of Eating Disorders*, 19(4), 391-397. [https://doi.org/10.1002/\(sici\)1098-108x\(199605\)19:4<391::Aid-eat6>3.0.Co;2-g](https://doi.org/10.1002/(sici)1098-108x(199605)19:4<391::Aid-eat6>3.0.Co;2-g)
- Buhren, K., Mainz, V., Herpertz-Dahlmann, B., Schafer, K., Kahraman-Lanzerath, B., Lente, C., & Konrad, K. (2012). Cognitive flexibility in juvenile anorexia nervosa patients before and after weight recovery. *J Neural Transm (Vienna)*, 119(9), 1047-1057. <https://doi.org/10.1007/s00702-012-0821-z>
- Calam, R., & Waller, G. (1998). Are eating and psychosocial characteristics in early teenage years useful predictors of eating characteristics in early adulthood? A 7-year longitudinal study. *International*

- Journal of Eating Disorders*, 24(4), 351-362. [https://doi.org/10.1002/\(sici\)1098-108x\(199812\)24:4<351::Aid-eat2>3.0.Co;2-1](https://doi.org/10.1002/(sici)1098-108x(199812)24:4<351::Aid-eat2>3.0.Co;2-1)
- Calugi, S., Ricca, V., Castellini, G., Lo Sauro, C., Ruocco, A., Chignola, E., El Ghoch, M., & Dalle Grave, R. (2015). The eating disorder examination: reliability and validity of the Italian version. *Eating and Weight Disorders*, 20(4), 505-511. <https://doi.org/10.1007/s40519-015-0191-2>
- Campbell, R., Boone, L., Vansteenkiste, M., & Soenens, B. (2018). Psychological need frustration as a transdiagnostic process in associations of self-critical perfectionism with depressive symptoms and eating pathology. *Journal of Clinical Psychology*, 74(10), 1775-1790. <https://doi.org/10.1002/jclp.22628>
- Canals, J., Sancho, C., & Arija, M. V. (2009). Influence of parent's eating attitudes on eating disorders in school adolescents. *European Child & Adolescent Psychiatry*, 18(6), 353-359. <https://doi.org/https://dx.doi.org/10.1007/s00787-009-0737-9>
- Cassidy, E., Allsopp, M., & Williams, T. (1999). Obsessive compulsive symptoms at initial presentation of adolescent eating disorders. *European Child and Adolescent Psychiatry*, 8(3), 193-199. <https://doi.org/10.1007/s007870050129>
- Castro, J., Gila, A., Gual, P., Lahortiga, F., Saura, B., & Toro, J. (2004). Perfectionism dimensions in children and adolescents with anorexia nervosa. *Journal of Adolescent Health*, 35(5), 392-398. <https://doi.org/10.1016/j.jadohealth.2003.11.094>
- Castro-Fornieles, J., Gual, P., Lahortiga, F., Gila, A., Casula, V., Fuhrmann, C., Imirizaldu, M., Saura, B., Martinez, E., & Toro, J. (2007). Self-oriented perfectionism in eating disorders. *Int J Eat Disord*, 40(6), 562-568. <http://ovidsp.ovid.com/ovidweb.cgi?T=JS&PAGE=reference&D=med6&NEWS=N&AN=17510925>
- Cella, S., Iannaccone, M., & Cotrufo, P. (2019). Does body shame mediate the relationship between parental bonding, self-esteem, maladaptive perfectionism, body mass index and eating disorders? A structural equation model. *Eating and Weight Disorders*. <https://doi.org/10.1007/s40519-019-00670-3>
- Chen, L. J., Fox, K. R., Haase, A. M., & Ku, P. W. (2010). Correlates of body dissatisfaction among Taiwanese adolescents. *Asia Pacific Journal of Clinical Nutrition*, 19(2), 172-179.
- Christian, C., Brosch, L. C., Vanzhula, I. A., Williams, B. M., Shankar Ram, S., & Levinson, C. A. (2019). Implementation of a dissonance-based, eating disorder prevention program in Southern, all-female high schools. *Body Image*, 30, 26-34. <https://doi.org/https://dx.doi.org/10.1016/j.bodyim.2019.05.003>
- Cole, S. H., & Edelman, R. J. (1987). Restraint, eating disorders and need to achieve in state and public school subjects. *Personality and Individual Differences*, 8(4), 475-482. [https://doi.org/10.1016/0191-8869\(87\)90209-1](https://doi.org/10.1016/0191-8869(87)90209-1)
- Collins, M. E. (1991). Body figure perceptions and preferences among preadolescent children. *International Journal of Eating Disorders*, 10(2), 199-208. [https://doi.org/10.1002/1098-108x\(199103\)10:2<199::Aid-eat2260100209>3.0.Co;2-d](https://doi.org/10.1002/1098-108x(199103)10:2<199::Aid-eat2260100209>3.0.Co;2-d)
- Conti, L. (2002). *Repertorio delle scale di valutazione in psichiatria*. SEE.
- Conti, M. A., Cordás, T. A., & Latorre, M. d. R. D. d. O. (2009). A study of the validity and reliability of the Brazilian version of the Body Shape Questionnaire (BSQ) among adolescents. *Revista Brasileira de Saúde Materno Infantil*, 9(3), 331-338. <https://doi.org/10.1590/s1519-38292009000300012>
- Costa, D., Charvin, I., Da Fonseca, D., & Bat-Pitault, F. (2022). Day hospital program for anorexia nervosa in children and adolescents: Assessment, management and specific focus on early onset anorexia nervosa. *L'Encéphale*. <https://doi.org/https://dx.doi.org/10.1016/j.encep.2022.06.009>
- Cresswell, C., Watson, H. J., Jones, E., Howell, J. A., & Egan, S. J. (2022). The role of compulsive exercise in the relationship between perfectionism and eating disorder pathology in underweight adolescents with eating disorders. *Eating behaviors*, 47, 101683. <https://doi.org/https://dx.doi.org/10.1016/j.eatbeh.2022.101683>
- Curzio, O., Maestro, S., Rossi, G., Calderoni, S., Giombini, L., Scardigli, S., Ragione, L. D., & Muratori, F. (2018). Transdiagnostic vs. disorder-focused perspective in children and adolescents with eating disorders: Findings from a large multisite exploratory study. *European Psychiatry*, 49, 81-93. <https://doi.org/10.1016/j.eurpsy.2017.12.024>

- Custers, K., & Van den Bulck, J. (2009). Viewership of pro-anorexia websites in seventh, ninth and eleventh graders. *European Eating Disorders Review*, 17(3), 214-219. <https://doi.org/10.1002/erv.910>
- Cuzzolaro, M., Vetrone, G., Marano, G., & Garfinkel, P. E. (2006). The Body Uneasiness Test (BUT): development and validation of a new body image assessment scale. *Eating and Weight Disorders*, 11(1), 1-13. <https://doi.org/10.1007/BF03327738>
- Dakanalis, A., Colmegna, F., Zanetti, M. A., Di Giacomo, E., Riva, G., & Clerici, M. (2018). Evaluation of the DSM-5 Severity Specifier for Bulimia Nervosa in Treatment-Seeking Youth. *Child Psychiatry and Human Development*, 49(1), 137-145. <https://doi.org/10.1007/s10578-017-0735-y>
- De Caro, E. F., & Di Blas, L. (2016). A prospective study on the reciprocal influence between personality and attitudes, behaviors, and psychological characteristics salient in eating disorders in a sample of non-clinical adolescents. *Eat Disord*, 24(5), 453-468. <https://doi.org/10.1080/10640266.2016.1207454>
- Dour, H. J., & Theran, S. A. (2011). The interaction between the superhero ideal and maladaptive perfectionism as predictors of unhealthy eating attitudes and body esteem. *Body Image*, 8(1), 93-96. <https://doi.org/10.1016/j.bodyim.2010.10.005>
- Drieberg, H., McEvoy, P. M., Hoiles, K. J., Shu, C. Y., & Egan, S. J. (2019). An examination of direct, indirect and reciprocal relationships between perfectionism, eating disorder symptoms, anxiety, and depression in children and adolescents with eating disorders. *Eating behaviors*, 32, 53-59. <https://doi.org/10.1016/j.eatbeh.2018.12.002>
- Eddy, K. T., Tanofsky-Kraff, M., Thompson-Brenner, H., Herzog, D. B., Brown, T. A., & Ludwig, D. S. (2007). Eating disorder pathology among overweight treatment-seeking youth: clinical correlates and cross-sectional risk modeling. *Behaviour Research and Therapy*, 45(10), 2360-2371. <https://doi.org/10.1016/j.brat.2007.03.017>
- Elizathe, L. S., Arana, F. G., & Rutsztein, G. (2018). A cross-sectional model of eating disorders in Argentinean overweight and obese children [journal article]. *Eating and Weight Disorders*, 23(1), 125-132. <https://doi.org/10.1007/s40519-016-0321-5>
- Fairburn, C. G., & Cooper, Z. (1993). The Eating Disorder Examination (12th edition). In *Binge eating: Nature, assessment, and treatment*. (pp. 317-360). Guilford Press.
- Fairburn, C. G., Cooper, Z., & Shafran, R. (2003). *The Clinical Perfectionism Questionnaire* [Unpublished manuscript]. Department of Psychiatry, University of Oxford.
- Fairweather-Schmidt, A. K., & Wade, T. D. (2014). DSM-5 eating disorders and other specified eating and feeding disorders: is there a meaningful differentiation? *International Journal of Eating Disorders*, 47(5), 524-533. <https://doi.org/10.1002/eat.22257>
- Fallon, A. E., & Rozin, P. (1985). Sex differences in perceptions of desirable body shape. *Journal of Abnormal Psychology*, 94(1), 102-105. <https://doi.org/10.1037/0021-843x.94.1.102>
- Fan, Y., Li, Y., Liu, A., Hu, X., Ma, G., & Xu, G. (2010). Associations between body mass index, weight control concerns and behaviors, and eating disorder symptoms among non-clinical Chinese adolescents. *BMC Public Health*, 10, 314. <https://doi.org/https://dx.doi.org/10.1186/1471-2458-10-314>
- Faust, J. (1987). Correlates of the Drive for Thinness in Young Female Adolescents. *Journal of Clinical Child Psychology*, 16(4), 313-319. [https://doi.org/10.1207/s15374424jccp1604\\_4](https://doi.org/10.1207/s15374424jccp1604_4)
- Ferreiro, F., Seoane, G., & Senra, C. (2012). Gender-related risk and protective factors for depressive symptoms and disordered eating in adolescence: a 4-year longitudinal study. *Journal of Youth and Adolescence*, 41(5), 607-622. <https://doi.org/10.1007/s10964-011-9718-7>
- Fichter, M., & Quadflieg, N. (2001). The structured interview for anorexic and bulimic disorders for DSM-IV and ICD-10 (SIAB-EX): reliability and validity. *European Psychiatry*, 16(1), 38-48. [https://doi.org/10.1016/s0924-9338\(00\)00534-4](https://doi.org/10.1016/s0924-9338(00)00534-4)
- First, M. B., Spitzer, R., Gibbon, M., & Williams, J. B. W. (2002). *Structured Clinical Interview for DSM-IV-TR Axis I Disorders*. New York State Psychiatric Institute.
- Flamarique, I., Plana, M. T., Castro-Fornieles, J., Borràs, R., Moreno, E., & Lázaro, L. (2019). Comparison of Perfectionism Dimensions in Adolescents with Anorexia Nervosa or Obsessive-Compulsive Disorder. *Journal of the Canadian Academy of Child and Adolescent Psychiatry. Journal de l'Académie*

- Canadienne de Psychiatrie de L'enfant et de l'Adolescent*, 28(2), 45-54.  
<https://pubmed.ncbi.nlm.nih.gov/31447902>  
<https://www.ncbi.nlm.nih.gov/pmc/articles/PMC6691799/>
- Flett, G. L., Hewitt, P. L., Besser, A., Su, C., Vaillancourt, T., Boucher, D., Munro, Y., Davidson, L. A., & Gale, O. (2016). The Child–Adolescent Perfectionism Scale. *Journal of Psychoeducational Assessment*, 34(7), 634-652. <https://doi.org/10.1177/0734282916651381>
- Flett, G. L., Hewitt, P. L., Boucher, D. J., Davidson, L. A., & Munro, Y. (1992). *The Child-Adolescent Perfectionism Scale: Development, Validation, and Association With Adjustment* Toronto, Canada: York University.].
- Flett, G. L., Hewitt, P. L., Boucher, D. J., Davidson, L. A., & Munro, Y. (1997). *The Child-Adolescent Perfectionism Scale: Development, validation, and association with adjustment*. [Unpublished manuscript].
- Formby, P., Watson, H. J., Hilyard, A., Martin, K., & Egan, S. J. (2014). Psychometric properties of the Compulsive Exercise Test in an adolescent eating disorder population. *Eating behaviors*, 15(4), 555-557. <https://doi.org/https://dx.doi.org/10.1016/j.eatbeh.2014.08.013>
- Fortes, L. S., Cipriani, F. M., Almeida, S. S., & Ferreira, M. E. C. (2014). Eating disorder symptoms: Association with perfectionism traits in male adolescents. *Revista de Psiquiatria Clinica*, 41(5), 117-120. <https://doi.org/https://dx.doi.org/10.1590/0101-608300000000024>
- Francisco, R., Espinoza, P., Gonzalez, M. L., Penelo, E., Mora, M., Roses, R., & Raich, R. M. (2015). Body dissatisfaction and disordered eating among Portuguese and Spanish adolescents: The role of individual characteristics and internalisation of sociocultural ideals. *Journal of Adolescence*, 41, 7-16. <https://doi.org/10.1016/j.adolescence.2015.02.004>
- Franco, D. L., Striegel-Moore, R. H., Barton, B. A., Schumann, B. C., Garner, D. M., Daniels, S. R., Schreiber, G. B., & Crawford, P. B. (2004). Measuring eating concerns in Black and White adolescent girls. *Int J Eat Disord*, 35(2), 179-189.  
<http://ovidsp.ovid.com/ovidweb.cgi?T=JS&PAGE=reference&D=med5&NEWS=N&AN=14994355>
- Frost, R. O., Marten, P., Lahart, C., & Rosenblate, R. (1990). The Dimensions of Perfectionism [journal article]. *Cognitive Therapy and Research*, 14(5), 449-468. <https://doi.org/Doi 10.1007/Bf01172967>
- Fryer, S., Waller, G., & Kroese, B. S. (1997). Stress, coping, and disturbed eating attitudes in teenage girls. *International Journal of Eating Disorders*, 22(4), 427-436. [https://doi.org/10.1002/\(sici\)1098-108x\(199712\)22:4<427::Aid-eat8>3.0.Co;2-o](https://doi.org/10.1002/(sici)1098-108x(199712)22:4<427::Aid-eat8>3.0.Co;2-o)
- Fulkerson, J. A., Keel, P. K., Leon, G. R., & Dorr, T. (1999). Eating-disordered behaviors and personality characteristics of high school athletes and nonathletes. *International Journal of Eating Disorders*, 26(1), 73-79. <https://www.ncbi.nlm.nih.gov/pubmed/10349586>
- Gan, W. Y., Mohamad, N., & Law, L. S. (2018). Factors Associated with Binge Eating Behavior among Malaysian Adolescents. *Nutrients*, 10(1). <https://doi.org/https://dx.doi.org/10.3390/nu10010066>
- Garner, D. M. (1991). *Eating Disorder Inventory-II professional manual*. Psychological Assessment Resources.
- Garner, D. M. (2004). *Eating Disorder Inventory-3. Professional manual*. Psychological Assessment Resources, Inc.
- Garner, D. M., & Garfinkel, P. E. (1979). The Eating Attitudes Test: an index of the symptoms of anorexia nervosa. *Psychological Medicine*, 9(2), 273-279. <https://doi.org/10.1017/s0033291700030762>
- Garner, D. M., Olmstead, M. P., & Polivy, J. (1983). Development and Validation of a Multidimensional Eating Disorder Inventory for Anorexia-Nervosa and Bulimia. *International Journal of Eating Disorders*, 2(2), 15-34. [https://doi.org/Doi 10.1002/1098-108x\(198321\)2:2<15::Aid-Eat2260020203>3.0.Co;2-6](https://doi.org/Doi 10.1002/1098-108x(198321)2:2<15::Aid-Eat2260020203>3.0.Co;2-6)
- Garner, D. M., & Olmsted, M. P. (1986). Scoring the Eating Disorder Inventory. *American Journal of Psychiatry*, 143(5), 680-a-680. <https://doi.org/10.1176/ajp.143.5.680-a>
- Garner, D. M., Olmsted, M. P., Bohr, Y., & Garfinkel, P. E. (1982). The eating attitudes test: psychometric features and clinical correlates. *Psychological Medicine*, 12(4), 871-878.  
<https://doi.org/10.1017/s0033291700049163>

- Gonzalez, M. L., Penelo, E., Espinoza, P., Francisco, R., Mora, M., Gutierrez, T., & Raich, R. M. (2018). Body dissatisfaction and disordered eating attitudes among adolescents from Portugal and Spain. *Behavioral Psychology*, 26(2), 323-335. <http://ovidsp.ovid.com/ovidweb.cgi?T=JS&PAGE=reference&D=psyc15&NEWS=N&AN=2018-45557-006>
- Goodwin, H., Haycraft, E., & Meyer, C. (2014). Psychological risk factors for compulsive exercise: A longitudinal investigation of adolescent boys and girls. *Personality and Individual Differences*, 68, 83-86. <https://doi.org/https://dx.doi.org/10.1016/j.paid.2014.03.048>
- Goodwin, H., Haycraft, E., Willis, A. M., & Meyer, C. (2011). Compulsive exercise: The role of personality, psychological morbidity, and disordered eating. *International Journal of Eating Disorders*, 44(7), 655-660. <https://doi.org/10.1002/eat.20902>
- Gormally, J., Black, S., Daston, S., & Rardin, D. (1982). The assessment of binge eating severity among obese persons. *Addictive Behaviors*, 7(1), 47-55. [https://doi.org/10.1016/0306-4603\(82\)90024-7](https://doi.org/10.1016/0306-4603(82)90024-7)
- Gustafsson, S. A., Edlund, B., Kjellin, L., & Norring, C. (2008). Personal standards, self-evaluation and perceived benefits of thinness in girls and young women with disturbed eating. *European Eating Disorders Review*, 16(6), 463-471. <https://doi.org/https://dx.doi.org/10.1002/erv.885>
- Gustafsson, S. A., Edlund, B., Kjellin, L., & Norring, C. (2009). Risk and protective factors for disturbed eating in adolescent girls - aspects of perfectionism and attitudes to eating and weight. *European Eating Disorders Review*, 17(5), 380-389. <https://doi.org/10.1002/erv.930>
- Gutierrez, T., Espinoza, P., Penelo, E., Mora, M., Gonzalez, M. L., Roses, R., & Raich, R. M. (2015). Association of biological, psychological and lifestyle risk factors for eating disturbances in adolescents. *Journal of Health Psychology*, 20(6), 839-849. <https://doi.org/10.1177/1359105315577302>
- Halmi, K. A., Falk, J. R., & Schwartz, E. (1981). Binge-eating and vomiting: a survey of a college population. *Psychological Medicine*, 11(4), 697-706. <https://doi.org/10.1017/s0033291700041192>
- Henderson, M., & Freeman, C. P. (1987). A self-rating scale for bulimia. The 'BITE'. *British Journal of Psychiatry*, 150, 18-24. <https://doi.org/10.1192/bjp.150.1.18>
- Herman, C. P., & Mack, D. (1975). Restrained and unrestrained eating. *J Pers*, 43(4), 647-660. <https://doi.org/10.1111/j.1467-6494.1975.tb00727.x>
- Herzog, D. B., Sacks, N. R., Keller, M. B., Lavori, P. W., von Ranson, K. B., & Gray, H. M. (1993). Patterns and predictors of recovery in anorexia nervosa and bulimia nervosa. *J Am Acad Child Adolesc Psychiatry*, 32(4), 835-842. <https://doi.org/10.1097/00004583-199307000-00020>
- Herzog, R., Alvarez-Pasquin, M. J., Diaz, C., Del Barrio, J. L., Estrada, J. M., & Gil, A. (2013). Are healthcare workers' intentions to vaccinate related to their knowledge, beliefs and attitudes? A systematic review. *BMC Public Health*, 13, 154. <https://doi.org/10.1186/1471-2458-13-154>
- Hewitt, P. L., & Flett, G. L. (1991). Perfectionism in the self and social contexts: conceptualization, assessment, and association with psychopathology. *J Pers Soc Psychol*, 60(3), 456-470. <https://doi.org/10.1037//0022-3514.60.3.456>
- Hewitt, P. L., Flett, G. L., & Ediger, E. (1995). Perfectionism traits and perfectionistic self-presentation in eating disorder attitudes, characteristics, and symptoms. *International Journal of Eating Disorders*, 18(4), 317-326. [https://doi.org/10.1002/1098-108x\(199512\)18:4<317::Aid-eat2260180404>3.0.Co;2-2](https://doi.org/10.1002/1098-108x(199512)18:4<317::Aid-eat2260180404>3.0.Co;2-2)
- Hewitt, P. L., Flett, G. L., Turnbull-Donovan, W., & Mikail, S. F. (1991). The Multidimensional Perfectionism Scale: Reliability, validity, and psychometric properties in psychiatric samples. *Psychol Assess*, 3(3), 464-468. <https://doi.org/10.1037/1040-3590.3.3.464>
- Hilbert, A., Tuschen-Caffier, B., Karwautz, A., Niederhofer, H., & Munsch, S. (2007). Eating Disorder Examination-Questionnaire. *Diagnostica*, 53(3), 144-154. <https://doi.org/10.1026/0012-1924.53.3.144>
- Hill, R. W., Huelsman, T. J., Furr, R. M., Kibler, J., Vicente, B. B., & Kennedy, C. (2004). A new measure of perfectionism: the Perfectionism Inventory. *J Pers Assess*, 82(1), 80-91. [https://doi.org/10.1207/s15327752jpa8201\\_13](https://doi.org/10.1207/s15327752jpa8201_13)

- Hohlstein, L. A., Smith, G. T., & Atlas, J. G. (1998). An application of expectancy theory to eating disorders: Development and validation of measures of eating and dieting expectancies. *Psychological Assessment*, 10(1), 49-58. <https://doi.org/10.1037/1040-3590.10.1.49>
- Hurst, K., & Zimmer-Gembeck, M. (2019). Family-based treatment with cognitive behavioural therapy for anorexia. *Clinical Psychologist*, 23(1), 61-70. <https://doi.org/https://dx.doi.org/10.1111/cp.12152>
- Hyler, S. E., & Reider, R. O. (1987). *Personality Diagnostic Questionnaire-Revised*. New York State Psychiatric Institute.
- Iannaccone, M., D'Olimpio, F., Cella, S., & Cotrufo, P. (2016). Self-esteem, body shame and eating disorder risk in obese and normal weight adolescents: A mediation model. *Eating behaviors*, 21, 80-83. <https://doi.org/10.1016/j.eatbeh.2015.12.010>
- Izydorczyk, B., & Sitnik-Warchulska, K. (2018). Sociocultural Appearance Standards and Risk Factors for Eating Disorders in Adolescents and Women of Various Ages. *Frontiers in Psychology*, 9, 429. <https://doi.org/10.3389/fpsyg.2018.00429>
- Johnston, J., Shu, C. Y., Hoiles, K. J., Clarke, P. J. F., Watson, H. J., Dunlop, P. D., & Egan, S. J. (2018). Perfectionism is associated with higher eating disorder symptoms and lower remission in children and adolescents diagnosed with eating disorders. *Eating behaviors*, 30, 55-60. <https://doi.org/10.1016/j.eatbeh.2018.05.008>
- Jones, E. J., Egan, S. J., Howell, J. A., Hoiles, K. J., & Mazzucchelli, T. G. (2020). An examination of the transdiagnostic cognitive-behavioural model of eating disorders in adolescents. *Eating behaviors*, 39, 101445. <https://doi.org/10.1016/j.eatbeh.2020.101445>
- Keery, H., LeMay-Russell, S., Barnes, T. L., Eckhardt, S., Peterson, C. B., Lesser, J., Gorrell, S., & Le Grange, D. (2019). Attributes of children and adolescents with avoidant/restrictive food intake disorder. *Journal of Eating Disorders*, 7, 31. <https://doi.org/10.1186/s40337-019-0261-3>
- Kerr, C., Watkins, B., & Jones, F. W. (2016). Inflated responsibility and perfectionism in child and adolescent anorexia. *Advances in Eating Disorders*, 4(3), 309-314. <https://doi.org/10.1080/21662630.2016.1217494>
- Kirsh, G., McVey, G., Tweed, S., & Katzman, D. K. (2007). Psychosocial Profiles of Young Adolescent Females Seeking Treatment for an Eating Disorder. *Journal of Adolescent Health*, 40(4), 351-356. <https://doi.org/10.1016/j.jadohealth.2006.11.003>
- Leung, F., Wang, J., & Tang, C. W. Y. (2004). Psychometric properties and normative data of the Eating Disorder Inventory among 12 to 18 year old Chinese girls in Hong Kong. *Journal of psychosomatic research*, 57(1), 59-66. <http://ovidsp.ovid.com/ovidweb.cgi?T=JS&PAGE=reference&D=med5&NEWS=N&AN=15256296>
- Levallius, J., Collin, C., & Birgegard, A. (2017). Now you see it, Now you don't: compulsive exercise in adolescents with an eating disorder. *Journal of Eating Disorders*, 5, 9. <https://doi.org/10.1186/s40337-016-0129-8>
- Lyman, E. L., & Luthar, S. S. (2014). Further Evidence on the "Costs of Privilege": Perfectionism in High-Achieving Youth at Socioeconomic Extremes. *Psychol Sch*, 51(9), 913-930. <https://doi.org/10.1002/pits.21791>
- Magson, N. R., Oar, E. L., Fardouly, J., Johnco, C. J., & Rapee, R. M. (2019). The Preeteen Perfectionist: An Evaluation of the Perfectionism Social Disconnection Model. *Child Psychiatry and Human Development*. <https://doi.org/10.1007/s10578-019-00897-2>
- Maiano, C., Morin, A. J. S., Monthuy-Blanc, J., Garbarino, J. M., & Ninot, G. (2016). Development and validity of a very short form of the Eating Disorder Inventory. *Comprehensive Psychiatry*, 65, 141-149. <https://doi.org/https://dx.doi.org/10.1016/j.comppsy.2015.11.004>
- Maloney, M. J., McGuire, J. B., & Daniels, S. R. (1988). Reliability testing of a children's version of the Eating Attitude Test. *Journal of the American Academy of Child and Adolescent Psychiatry*, 27(5), 541-543. <https://doi.org/10.1097/00004583-198809000-00004>
- Marsh, H. W., Trautwein, U., Ludtke, O., Koller, O., & Baumert, J. (2006). Integration of multidimensional self-concept and core personality constructs: construct validation and relations to well-being and achievement. *J Pers*, 74(2), 403-456. <https://doi.org/10.1111/j.1467-6494.2005.00380.x>

- McCabe, M. P., & Vincent, M. A. (2003). The role of biodevelopmental and psychological factors in disordered eating among adolescent males and females. *European Eating Disorders Review*, 11(4), 315-328. <https://doi.org/10.1002/erv.500>
- McVey, G. L., Davis, R., Tweed, S., & Shaw, B. F. (2004). Evaluation of a school-based program designed to improve body image satisfaction, global self-esteem, and eating attitudes and behaviors: a replication study. *Int J Eat Disord*, 36(1), 1-11. <http://ovidsp.ovid.com/ovidweb.cgi?T=JS&PAGE=reference&D=med5&NEWS=N&AN=15185266>
- McVey, G. L., Pepler, D., Davis, R., Flett, G. L., & Abdolell, M. (2002). Risk and Protective Factors Associated with Disordered Eating During Early Adolescence. *The Journal of Early Adolescence*, 22(1), 75-95. <https://doi.org/10.1177/0272431602022001004>
- Mockdece Neves, C., Fernandes Filgueiras Meireles, J., Berbert de Carvalho, P. H., Sousa Almeida, S., & Caputo Ferreira, M. E. (2016). Body dissatisfaction among artistic gymnastics adolescent athletes and non-athletes. *Brazilian Journal of Kineanthropometry & Human Performance*, 18(1), 82-92. <https://doi.org/10.5007/1980-0037.2016v18n1p82>
- Moessner, M., Fassnacht, D. B., & Bauer, S. (2015). Online assessment of eating disorders: The Clinical and Research Inventory for Eating Disorders (CR-EAT). *Mental Health & Prevention*, 3(4), 170-177. <https://doi.org/10.1016/j.mhp.2015.08.001>
- Mohoric, T., Pokrajac-Bulian, A., Anic, P., Kukic, M., & Mohovic, P. (2022). Emotion regulation, perfectionism, and eating disorder symptoms in adolescents: the mediating role of cognitive eating patterns. *Current Psychology (New Brunswick, N.J.)*, 1-12. <https://doi.org/https://dx.doi.org/10.1007/s12144-022-03824-2>
- Morgan, J. F., Reid, F., & Lacey, J. H. (1999). The SCOFF questionnaire: assessment of a new screening tool for eating disorders. *BMJ*, 319(7223), 1467-1468. <https://doi.org/10.1136/bmj.319.7223.1467>
- Morgan-Lowes, K. L., Clarke, P. J. F., Hoiles, K. J., Shu, C. Y., Watson, H. J., Dunlop, P. D., & Egan, S. J. (2019). The relationships between perfectionism, anxiety and depression across time in paediatric eating disorders. *Eating behaviors*, 34, 101305. <https://doi.org/10.1016/j.eatbeh.2019.101305>
- Nilsson, K., & Häggblöf, B. (2005). Long-term follow-up of adolescent onset anorexia nervosa in northern Sweden. *European Eating Disorders Review*, 13(2), 89-100. <https://doi.org/10.1002/erv.631>
- Nilsson, K., Sundbom, E., & Hagglof, B. (2008). A longitudinal study of perfectionism in adolescent onset anorexia nervosa-restricting type. *European Eating Disorders Review*, 16(5), 386-394. <https://doi.org/10.1002/erv.850>
- Nordin-Bates, S. M., Walker, I. J., & Redding, E. (2011). Correlates of disordered eating attitudes among male and female young talented dancers: findings from the UK centres for advanced training. *Eat Disord*, 19(3), 211-233. <https://doi.org/10.1080/10640266.2011.564976>
- Obeid, N., Valois, D. D., Bedford, S., Norris, M. L., Hammond, N. G., & Spettigue, W. (2020). Asceticism, perfectionism and overcontrol in youth with eating disorders. *Eating and Weight Disorders*. <https://doi.org/10.1007/s40519-019-00837-y>
- Oros, L. B. (2003). Medicion del perfeccionismo infantil: Desarrollo y validacion de una escala para ninos de 8 a 13 anos de edad. *Rev Iberoam Diagnostico y Evaluacion Psicologica*, 16(2), 99-112. [http://www.aidep.org/03\\_ridep/R16/R166.pdf](http://www.aidep.org/03_ridep/R16/R166.pdf)
- Pamies-Aubalat, L., Quiles Marcos, Y., & Torregrosa Diez, M. S. (2022). Psychosocial profile related to disordered eating attitudes in spanish adolescents. *Current Psychology: A Journal for Diverse Perspectives on Diverse Psychological Issues*, No-Specified. <https://doi.org/https://dx.doi.org/10.1007/s12144-022-03164-1>
- Pauls, A., Dimitropoulos, G., Marcoux-Louie, G., Singh, M., & Patten, S. B. (2022). Psychological characteristics and childhood adversity of adolescents with atypical anorexia nervosa versus anorexia nervosa. *Eating disorders*, 30(2), 210-222. <https://doi.org/https://dx.doi.org/10.1080/10640266.2020.1836907>
- Pellicciari, A., Gualandi, S., Iero, L., Monti, M., Di Pietro, E., Sacrato, L., Gualandi, P., & Franzoni, E. (2012). Psychometric evaluation of SAFA P Test for eating disorders in adolescents: Comparative validation

- with EDI-2. *European Eating Disorders Review*, 20(1), e108-e113.  
<https://doi.org/https://dx.doi.org/10.1002/erv.1099>
- Pereira, A. T., Maia, B., Bos, S., Soares, M. J., Marques, M., Macedo, A., & Azevedo, M. H. (2008). The Portuguese short form of the Eating Attitudes Test-40. *European Eating Disorders Review*, 16(4), 319-325. <https://doi.org/10.1002/erv.846>
- Petersen, A. C., Schulenberg, J. E., Abramowitz, R. H., Offer, D., & Jarcho, H. D. (1984). A self-image questionnaire for young adolescents (SIQYA): Reliability and validity studies. *J Youth Adolesc*, 13(2), 93-111. <https://doi.org/10.1007/BF02089104>
- Petisco-Rodriguez, C., Sanchez-Sanchez, L. C., Fernandez-Garcia, R., Sanchez-Sanchez, J., & Garcia-Montes, J. M. (2020). Disordered Eating Attitudes, Anxiety, Self-Esteem and Perfectionism in Young Athletes and Non-Athletes. *International Journal of Environmental Research and Public Health*, 17(18). <https://doi.org/10.3390/ijerph17186754>
- Phillips, R., Stewart, S. M., Presnell, K., Simmons, A., Kennard, B. D., Liss, D., & Setliff, S. (2010). Psychological variables impacting weight gain rapidity in adolescents hospitalized for eating disorders. *European Eating Disorders Review*, 18(5), 376-384. <https://doi.org/10.1002/erv.998>
- Pla, C., & Toro, J. (1999). Anorexia nervosa in a Spanish adolescent sample: an 8-year longitudinal study. *Acta Psychiatrica Scandinavica*, 100(6), 441-446.
- Plumed, J., Gimeno, N., Barberá, M., Ruiz, E., Conesa, L., Rojo-Bofill, L. M., Livianos, L., & Rojo, L. (2019). Teasing as a risk factor for abnormal eating behaviours: A prospective study in an adolescent population. *Revista de Psiquiatria y Salud Mental*, 12(1), 17-27. <https://doi.org/10.1016/j.rpsm.2017.06.007>
- Pumariega, A. J., & LaBarbera, J. D. (1986). Eating attitudes and personality variables in a nonclinical sample. *International Journal of Eating Disorders*, 5(2), 285-294. <http://ovidsp.ovid.com/ovidweb.cgi?T=JS&PAGE=reference&D=emed3&NEWS=N&AN=16141055>
- Ramon-Jarne, F. J., Jurado, D., Jimenez-Fernandez, S., Gutierrez-Rojas, L., Martinez-Ortega, J. M., & Gurpegui, M. (2019). Disordered eating behaviors among Christian and Muslim adolescents in Ceuta, a multicultural town. *Psychiatry research*, 272, 182-189. <https://doi.org/https://dx.doi.org/10.1016/j.psychres.2018.12.089>
- Rosenvinge, J. H., Borgen, J. S., & Børresen, R. (1999). The prevalence and psychological correlates of anorexia nervosa, bulimia nervosa and binge eating among 15-yr-old students: A controlled epidemiological study. *European Eating Disorders Review*, 7(5), 382-391. [https://doi.org/10.1002/\(SICI\)1099-0968\(199911\)7:5<382::AID-ERV309>3.0.CO;2-W](https://doi.org/10.1002/(SICI)1099-0968(199911)7:5<382::AID-ERV309>3.0.CO;2-W)
- Rosewall, J. K., Gleaves, D. H., & Latner, J. D. (2018). An examination of risk factors that moderate the body dissatisfaction-eating pathology relationship among New Zealand adolescent girls. *Journal of Eating Disorders*, 6, 38. <https://doi.org/10.1186/s40337-018-0225-z>
- Ruggiero, G. M., Levi, D., Ciuna, A., & Sassaroli, S. (2003). Stress situation reveals an association between perfectionism and drive for thinness. *International Journal of Eating Disorders*, 34(2), 220-226. <https://doi.org/10.1002/eat.10191>
- Salbach-Andrae, H., Klinkowski, N., Holzhausen, M., Frieler, K., Bohnekamp, I., Thiels, C., Bender, C., & Vandereycken, W. (2009). The German version of the Anorectic Behavior Observation Scale (ABOS). *European Child and Adolescent Psychiatry*, 18(5), 321-325. <https://doi.org/10.1007/s00787-008-0732-6>
- Sander, J., Moessner, M., & Bauer, S. (2021). Depression, Anxiety and Eating Disorder-Related Impairment: Moderators in Female Adolescents and Young Adults. *International Journal of Environmental Research and Public Health*, 18(5). <https://doi.org/10.3390/ijerph18052779>
- Santonastaso, P., Friederici, S., & Favaro, A. (1999). Full and partial syndromes in eating disorders: A 1-year prospective study of risk factors among female students. *Psychopathology*, 32(1), 50-56. <https://doi.org/10.1159/000029067>
- Schilder, C. M. T., Sternheim, L. C., Aarts, E., van Elburg, A. A., & Danner, U. N. (2021). Relationships between educational achievement, intelligence, and perfectionism in adolescents with eating disorders. *Int J Eat Disord*, 54(5), 794-801. <https://doi.org/https://dx.doi.org/10.1002/eat.23482>

- Schlegl, S., Smith, K. E., Vierl, L., Crosby, R. D., Moessner, M., Neumayr, C., & Voderholzer, U. (2021). Using network analysis to compare diagnosis-specific and age-specific symptom networks in eating disorders. *Int J Eat Disord*, 54(8), 1463-1476. <https://doi.org/https://dx.doi.org/10.1002/eat.23523>
- Sehm, M., & Warschburger, P. (2015). The Specificity of Psychological Factors Associated with Binge Eating in Adolescent Boys and Girls. *Journal of Abnormal Child Psychology*, 43(8), 1563-1571. <https://doi.org/10.1007/s10802-015-0026-7>
- Sehm, M., & Warschburger, P. (2018). Prospective Associations Between Binge Eating and Psychological Risk Factors in Adolescence. *Journal of Clinical Child and Adolescent Psychology*, 47(5), 770-784. <https://doi.org/10.1080/15374416.2016.1178124>
- Sepulveda, A. R., Moreno-Encinas, A., Martinez-Huertas, J. A., Anastasiadou, D., Nova, E., Marcos, A., Gomez-Martinez, S., Villa-Asensi, J. R., Mollejo, E., & Graell, M. (2021). Toward a Biological, Psychological and Familial Approach of Eating Disorders at Onset: Case-Control ANOBAS Study. *Frontiers in psychology*, 12, 714414. <https://doi.org/https://dx.doi.org/10.3389/fpsyg.2021.714414>
- Serpell, L., Hirani, V., Willoughby, K., Neiderman, M., & Lask, B. (2006). Personality or pathology?: Obsessive-compulsive symptoms in children and adolescents with anorexia nervosa. *European Eating Disorders Review*, 14(6), 404-413. <https://doi.org/10.1002/erv.742>
- Shahyad, S., Pakdaman, S., Shokri, O., & Saadat, S. H. (2018). The Role of Individual and Social Variables in Predicting Body Dissatisfaction and Eating Disorder Symptoms among Iranian Adolescent Girls: An Expanding of the Tripartite Influence Mode. *Eur J Transl Myol*, 28(1), 7277. <https://doi.org/10.4081/ejtm.2018.7277>
- Shaw, H. E., Stice, E., & Springer, D. W. (2004). Perfectionism, body dissatisfaction, and self-esteem in predicting bulimic symptomatology: lack of replication. *International Journal of Eating Disorders*, 36(1), 41-47. <https://doi.org/10.1002/eat.20016>
- Shore, R. A., & Porter, J. E. (1990). Normative and reliability data for 11 to 18 year olds on the eating disorder inventory. *International Journal of Eating Disorders*, 9(2), 201-207. <http://ovidsp.ovid.com/ovidweb.cgi?T=JS&PAGE=reference&D=emed4&NEWS=N&AN=20165193>
- Shu, C. Y., Watson, H. J., Anderson, R. A., Wade, T. D., Kane, R. T., & Egan, S. J. (2019). A randomized controlled trial of unguided internet cognitive behaviour therapy for perfectionism in adolescents: Impact on risk for eating disorders. *Behaviour research and therapy*, 120, 103429. <https://doi.org/https://dx.doi.org/10.1016/j.brat.2019.103429>
- Simmons, J. R., Smith, G. T., & Hill, K. K. (2002). Validation of eating and dieting expectancy measures in two adolescent samples. *Int J Eat Disord*, 31(4), 461-473. <http://ovidsp.ovid.com/ovidweb.cgi?T=JS&PAGE=reference&D=med4&NEWS=N&AN=11948651>
- Slade, P. D., Dewey, M. E., Kiemle, G., & Clin, M. (1990). Update on SCANS: A screening instrument for identifying individuals at risk of developing an eating disorder. *International Journal of Eating Disorders*, 9(5), 583-584. [https://doi.org/10.1002/1098-108x\(199009\)9:5<583::Aid-eat2260090515>3.0.Co;2-a](https://doi.org/10.1002/1098-108x(199009)9:5<583::Aid-eat2260090515>3.0.Co;2-a)
- Slaney, R. B., Rice, K. G., Mobley, M., Trippi, J., & Ashby, J. S. (2001). The revised almost perfect scale. *Measurement and Evaluation in Counseling and Development*, 34(3), 130-145. <https://doi.org/Doi10.1080/07481756.2002.12069030>
- Srivastava, K. (2009). *Conceptualization and development of the appearance perfectionism scale: Preliminary evidence for validity and utility in a college student population* [University of Michigan].
- Steiger, H., Leung, F. Y. K., Puentes-Neuman, G., & Gottheil, N. (1992). Psychosocial profiles of adolescent girls with varying degrees of eating and mood disturbances. *International Journal of Eating Disorders*, 11(2), 121-131. [https://doi.org/10.1002/1098-108x\(199203\)11:2<121::Aid-eat2260110204>3.0.Co;2-d](https://doi.org/10.1002/1098-108x(199203)11:2<121::Aid-eat2260110204>3.0.Co;2-d)
- Steiger, H., Puentes-Neuman, G., & Leung, F. Y. K. (1991). Personality and family features of adolescent girls with eating symptoms: Evidence for restrictor/binger differences in a nonclinical population. *Addictive Behaviors*, 16(5), 303-314. [https://doi.org/10.1016/0306-4603\(91\)90023-b](https://doi.org/10.1016/0306-4603(91)90023-b)

- Stice, E. (1998). Modeling of eating pathology and social reinforcement of the thin-ideal predict onset of bulimic symptoms. *Behaviour Research and Therapy*, 36(10), 931-944. [https://doi.org/10.1016/s0005-7967\(98\)00074-6](https://doi.org/10.1016/s0005-7967(98)00074-6)
- Stice, E., & Agras, W. S. (1998). Predicting onset and cessation of bulimic behaviors during adolescence: A longitudinal grouping analysis. *Behavior Therapy*, 29(2), 257-276. [https://doi.org/10.1016/s0005-7894\(98\)80006-3](https://doi.org/10.1016/s0005-7894(98)80006-3)
- Stice, E., Nemeroff, C., & Shaw, H. E. (1996). Test of the dual pathway model of bulimia nervosa: Evidence for dietary restraint and affect regulation mechanisms. *J Soc Clin Psychol*, 15, 340-363. <https://doi.org/10.1037/t04547-000>
- Stornaes, A. V., Rosenvinge, J. H., Sundgot-Borgen, J., Pettersen, G., & Friborg, O. (2019). Profiles of Perfectionism Among Adolescents Attending Specialized Elite- and Ordinary Lower Secondary Schools: A Norwegian Cross-Sectional Comparative Study. *Frontiers in Psychology*, 10, 2039. <https://doi.org/10.3389/fpsyg.2019.02039>
- Striegel-Moore, R. H., Schreiber, G. B., Lo, A., Crawford, P., Obarzanek, E., & Rodin, J. (2000). Eating disorder symptoms in a cohort of 11 to 16-year-old black and white girls: The NHLBI growth and health study. *International Journal of Eating Disorders*, 27(1), 49-66. [https://doi.org/10.1002/\(sici\)1098-108x\(200001\)27:1<49::Aid-eat6>3.0.Co;2-e](https://doi.org/10.1002/(sici)1098-108x(200001)27:1<49::Aid-eat6>3.0.Co;2-e)
- Strober, M. (1987). *The eating disorders family history interview* [University of California]. Los Angeles.
- Stunkard, A. J., & Messick, S. (1985). The three-factor eating questionnaire to measure dietary restraint, disinhibition and hunger. *J Psychosom Res*, 29(1), 71-83. [https://doi.org/10.1016/0022-3999\(85\)90010-8](https://doi.org/10.1016/0022-3999(85)90010-8)
- Stunkard, A. J., Sorenson, T., & Schulsinger, F. (1983). Use of the Danish adoption register for the study of obesity and thinness. In S. S. Kety, L. P. Rowland, R. L. Sidman, & S. W. Matthysse (Eds.), *The genetics of neurological and psychiatric disorders*.
- Swierczynska, J. (2020). Coexistence of the features of perfectionism and anorexia readiness in school youth. *Współwystępowanie cech perfekcjonizmu i gotowosci anorektycznej u młodzieży szkolnej.*, 54(2), 239-252. <https://doi.org/https://dx.doi.org/10.12740/PP/OnlineFirst/109070>
- Swierczynska, J. (2022). The image of perfectionism in youth with diverse structure and intensity of anorexia readiness. *Obraz perfekcjonizmu u młodzieży o różnej strukturze i nasileniu gotowosci anorektycznej.*, 56(3), 523-534. <https://doi.org/https://dx.doi.org/10.12740/PP/OnlineFirst/130484>
- Teixeira, M. D., Pereira, A. T., Marques, M. V., Saraiva, J. M., & Macedo, A. F. (2016). Eating behaviors, body image, perfectionism, and self-esteem in a sample of Portuguese girls. *Brazilian Journal of Psychiatry*, 38(2), 135-140. <https://doi.org/10.1590/1516-4446-2015-1723>
- Thelen, M. H., Farmer, J., Wonderlich, S., & Smith, M. (1991). A revision of the Bulimia Test: The BULIT--R. *Psychological Assessment*, 3(1), 119-124. <https://doi.org/10.1037/1040-3590.3.1.119>
- Thompson, J. K., Heinberg, L. J., Altabe, M., & Tantleff-Dunn, S. (1999). *Exacting beauty: Theory, assessment, and treatment of body image disturbance* [doi:10.1037/10312-000]. American Psychological Association. <https://doi.org/10.1037/10312-000>
- Thompson, J. K., Van den Berg, P., Roehrig, M., Guarda, A. S., & Heinberg, L. J. (2004). The sociocultural attitudes towards appearance scale-3 (SATAQ-3): development and validation. *International Journal of Eating Disorders*, 35(3), 293-304. <https://doi.org/10.1002/eat.10257>
- Thompson, M. A., & Gray, J. J. (1995). Development and validation of a new body-image assessment scale. *Journal of Personality Assessment*, 64(2), 258-269. [https://doi.org/10.1207/s15327752jpa6402\\_6](https://doi.org/10.1207/s15327752jpa6402_6)
- Tiggemann, M., & Dyer, G. M. (1995). Ideal body shape preferences and eating disorder scores in adolescent women. *Psychol Health*, 10(4), 345-347. <https://doi.org/10.1080/08870449508400248>
- Turgeon, M.-E., Forget, J., & Begin, J. (2015). Adaptation and psychometric testing of the self-oriented perfectionism subscale of the Positive and Negative Perfectionism Scale. *Adaptation et evaluation des proprietes psychometriques de la sous-echelle de perfectionnisme oriente vers soi de l'Echelle de Perfectionnisme Positif et Negatif.*, 25(4), 148-158. <https://doi.org/https://dx.doi.org/10.1016/j.jtcc.2015.05.001>

- Turgeon, M. E., Forget, J., & Senecal, C. (2011). Eating disorders, depression, self-esteem and perfectionism in children. *Troubles des conduites alimentaires, depression, estime de soi et perfectionnisme chez les enfants.*, 17(4), 315-328. <https://doi.org/https://dx.doi.org/10.1016/j.prps.2009.11.002>
- Tyrka, A. R., Waldron, I., Graber, J. A., & Brooks-Gunn, J. (2002). Prospective predictors of the onset of anorexic and bulimic syndromes. *International Journal of Eating Disorders*, 32(3), 282-290. <https://doi.org/10.1002/eat.10094>
- Upadhyah, A., Misra, R., Parchwani, D., & Maheria, P. (2014). Prevalence and risk factors for eating disorders in Indian adolescent females. *National Journal of Physiology, Pharmacy and Pharmacology*, 4(2), 153-157. <https://doi.org/https://dx.doi.org/10.5455/njppp.2014.4.041220131>
- Vall, E., & Wade, T. D. (2017). Predictors and moderators of outcomes and readmission for adolescent inpatients with anorexia nervosa: A pilot study. *Clinical Psychologist*, 21(2), 143-152. <https://doi.org/10.1111/cp.12091>
- van Noort, B. M., Lohmar, S. K., Pfeiffer, E., Lehmkuhl, U., Winter, S. M., & Kappel, V. (2018). Clinical characteristics of early onset anorexia nervosa. *European Eating Disorders Review*, 26(5), 519-525. <https://doi.org/10.1002/erv.2614>
- van Strien, T., Frijters, J. E. R., Bergers, G. P. A., & Defares, P. B. (1986). The Dutch Eating Behavior Questionnaire (DEBQ) for assessment of restrained, emotional, and external eating behavior. *International Journal of Eating Disorders*, 5(2), 295-315. [https://doi.org/10.1002/1098-108x\(198602\)5:2<295::Aid-eat2260050209>3.0.Co;2-t](https://doi.org/10.1002/1098-108x(198602)5:2<295::Aid-eat2260050209>3.0.Co;2-t)
- Varela-Besteiro, O., Serrano-Troncoso, E., Rodriguez-Vicente, V., Curet-Santisteban, M., Conangla-Rosello, G., Cecilia-Costa, R., Carulla-Roig, M., Matali-Costa, J. L., & Dolz-Abadia, M. (2017). Suicidal ideation and self-injurious behavior in adolescents with eating disorders. *Actas Españolas de Psiquiatría: Acepsi*, 45(4), 157-166.
- Wade, T. D., & Lowes, J. (2002). Variables associated with disturbed eating habits and overvalued ideas about the personal implications of body shape and weight in a female adolescent population. *International Journal of Eating Disorders*, 32(1), 39-45. <https://doi.org/10.1002/eat.10054>
- Wade, T. D., & O'Shea, A. (2015). DSM-5 unspecified feeding and eating disorders in adolescents: what do they look like and are they clinically significant? *International Journal of Eating Disorders*, 48(4), 367-374. <https://doi.org/10.1002/eat.22303>
- Wade, T. D., Wilksch, S. M., Paxton, S. J., Byrne, S. M., & Austin, S. B. (2015). How perfectionism and ineffectiveness influence growth of eating disorder risk in young adolescent girls. *Behaviour Research and Therapy*, 66, 56-63. <https://doi.org/10.1016/j.brat.2015.01.007>
- Warschburger, P., & Zitzmann, J. (2018). The Efficacy of a Universal School-Based Prevention Program for Eating Disorders among German Adolescents: Results from a Randomized-Controlled Trial. *Journal of youth and adolescence*, 47(6), 1317-1331. <https://doi.org/https://dx.doi.org/10.1007/s10964-018-0852-3>
- Welch, H. A., Agras, W. S., Lock, J., & Halmi, K. A. (2020). Perfectionism, anorexia nervosa, and family treatment: How perfectionism changes throughout treatment and predicts outcomes. *Int J Eat Disord*, 53(12), 2055-2060. <https://doi.org/https://dx.doi.org/10.1002/eat.23396>
- Wells, G. A., Wells, G., Shea, B., Shea, B., O'Connell, D., Peterson, J., Welch, Losos, M., Tugwell, P., Ga, S. W., Zello, G. A., & Petersen, J. A. (2014). The Newcastle-Ottawa Scale (NOS) for Assessing the Quality of Nonrandomised Studies in Meta-Analyses.
- Westerberg, J., Edlund, B., & Ghaderi, A. (2008). A 2-year longitudinal study of eating attitudes, BMI, perfectionism, asceticism and family climate in adolescent girls and their parents [journal article]. *Eating and Weight Disorders*, 13(2), 64-72. <https://doi.org/10.1007/bf03327605>
- Westerberg, J., Edlund, B., & Ghaderi, A. (2010). Risk and protective factors for disturbed eating: a 7-year longitudinal study of eating attitudes and psychological factors in adolescent girls and their parents. *Eating and Weight Disorders*, 15(4), e208-218. <https://doi.org/10.1007/bf03325302>
- Wiederman, M. W., & Pryor, T. (1998). The Relationship Between Substance Use and Clinical Characteristics Among Adolescent Girls with Anorexia Nervosa or Bulimia Nervosa. *J Child Adolesc Subst Abuse*, 6(2), 39-47. [https://doi.org/10.1300/J029v06n02\\_03](https://doi.org/10.1300/J029v06n02_03)

- Wilksch, S. M., Durbridge, M. R., & Wade, T. D. (2008). A preliminary controlled comparison of programs designed to reduce risk of eating disorders targeting perfectionism and media literacy. *Journal of the American Academy of Child and Adolescent Psychiatry*, 47(8), 937-947. <https://doi.org/https://dx.doi.org/10.1097/CHI.0b013e3181799f4a>
- Wilksch, S. M., Paxton, S. J., Byrne, S. M., Austin, S. B., O'Shea, A., & Wade, T. D. (2017). Outcomes of three universal eating disorder risk reduction programs by participants with higher and lower baseline shape and weight concern. *Int J Eat Disord*, 50(1), 66-75. <https://doi.org/https://dx.doi.org/10.1002/eat.22642>
- Wilksch, S. M., & Wade, T. D. (2010). Risk factors for clinically significant importance of shape and weight in adolescent girls. *J Abnorm Psychol*, 119(1), 206-215. <https://doi.org/10.1037/a0017779>
- Wiseman, C. V., Sunday, S. R., Bortolotti, F., & Halmi, K. A. (2004). Primary prevention of eating disorders through attitude change: A two country comparison. *Eating disorders*, 12(3), 241-250. <https://doi.org/https://dx.doi.org/10.1080/10640260490481447>
- Wojtowicz, A. E., & von Ranson, K. M. (2012). Weighing in on risk factors for body dissatisfaction: a one-year prospective study of middle-adolescent girls. *Body Image*, 9(1), 20-30. <https://doi.org/10.1016/j.bodyim.2011.07.004>
- World Health Organization. (1992). *The ICD 10 Classification of Mental and Behavioural Disorders*. World Health Organization.
- Ziółkowska, B. (2001). *Ekspresja syndromu gotowości anorektycznej u dziewcząt w stadium adolescencji*. Wydawnictwo Fundacji Humaniora.
